# Supplementary material for: Iron supplementation alleviates pathologies in a mouse model of facioscapulohumeral muscular dystrophy
Source: JCI journal article supplement (doi:10.1172/jci181881), 2025-07-01

A

Iron  
2 repeats

DFO

-

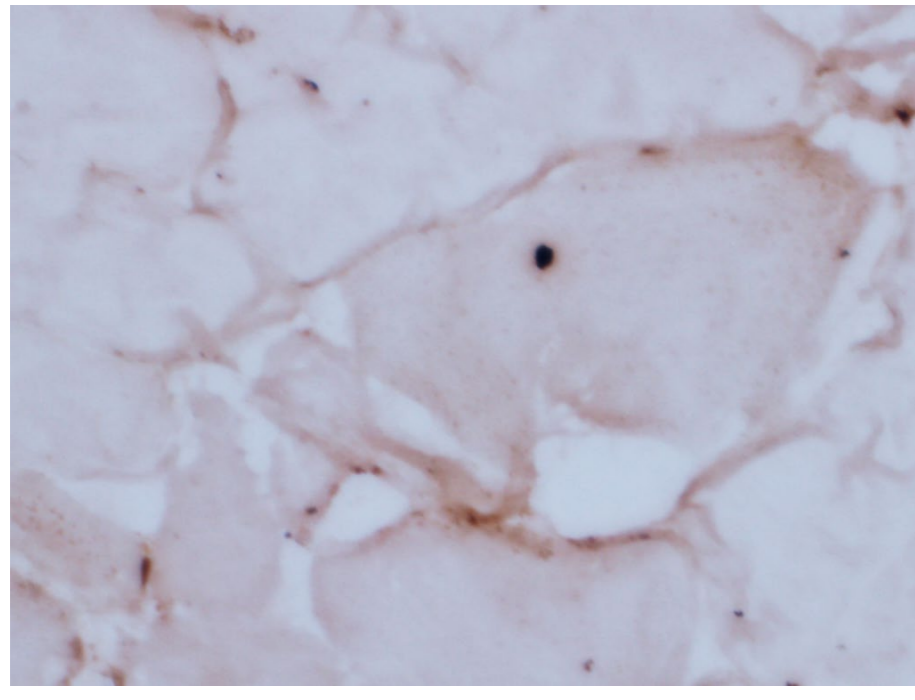

+

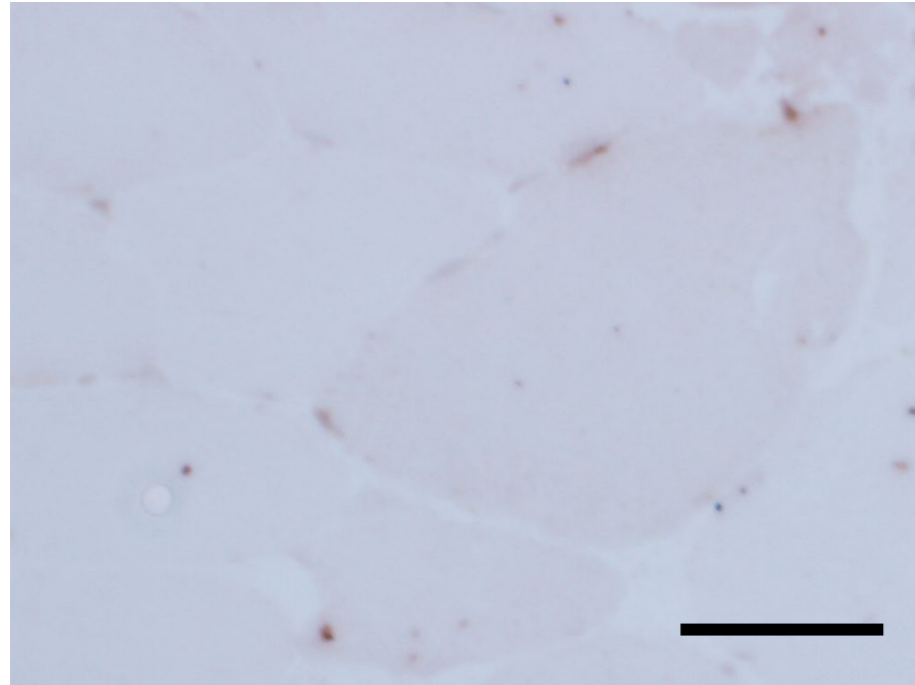

# Supplementary Figure 2

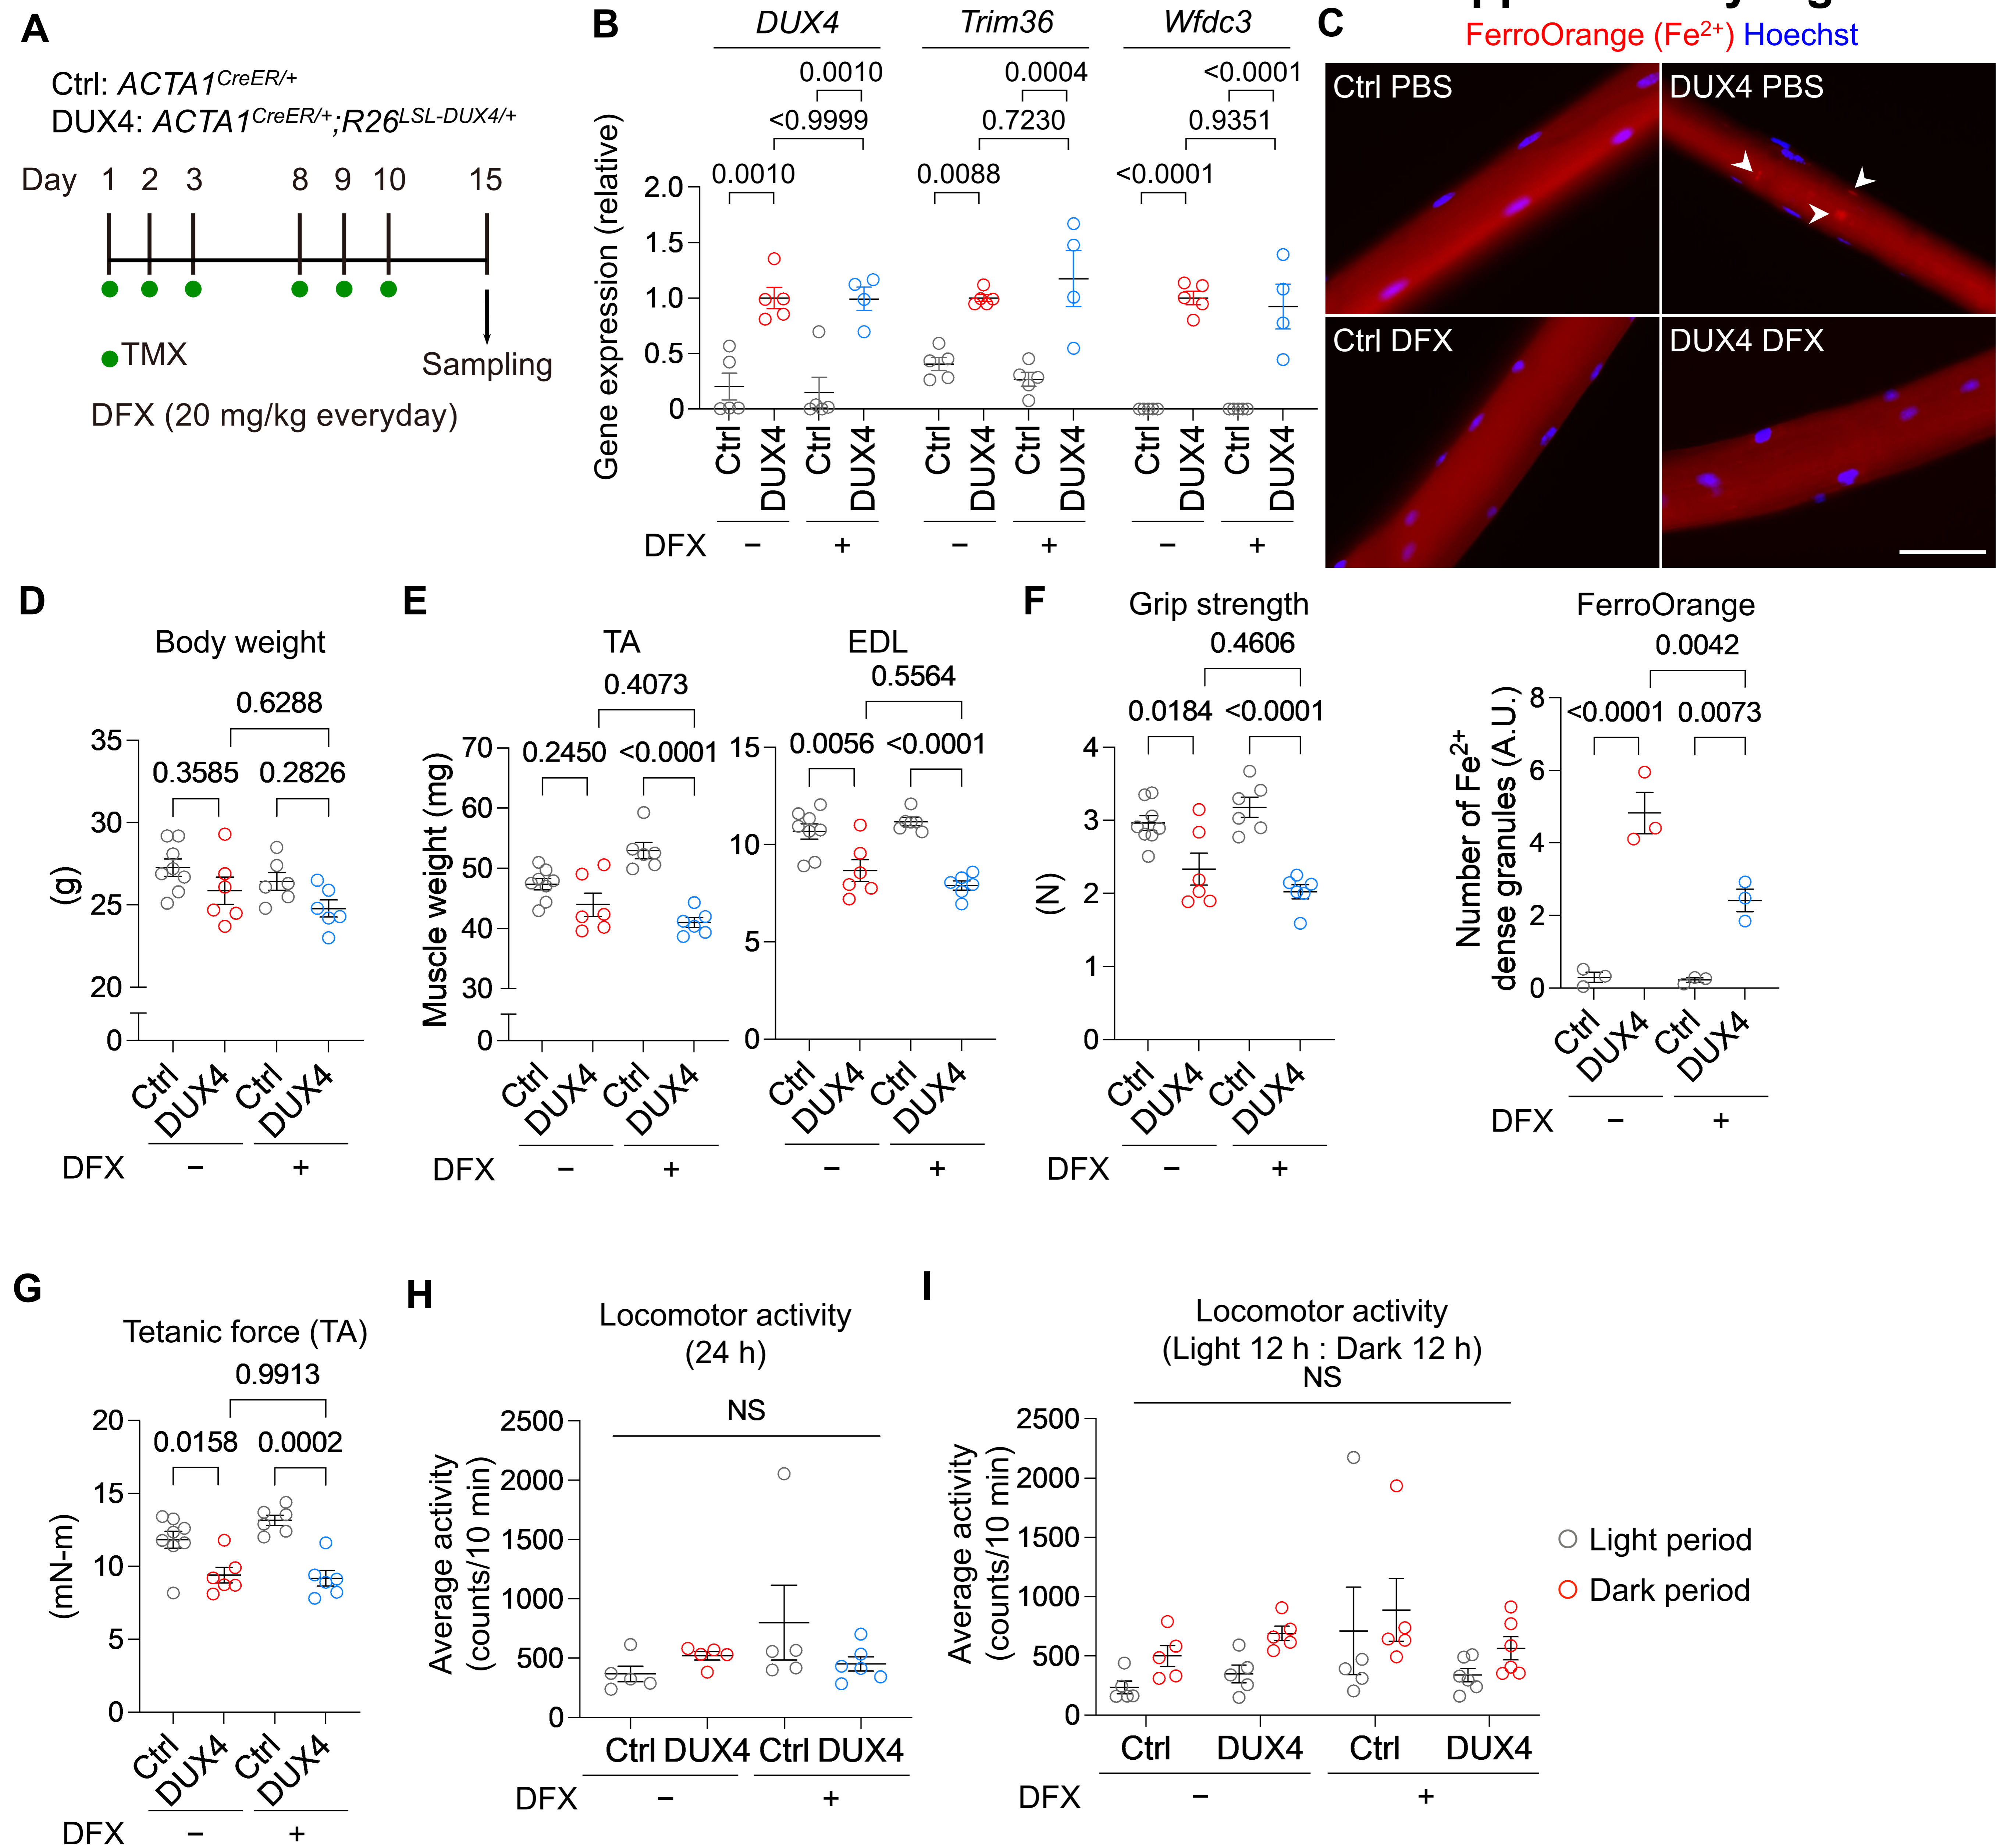

# Supplementary Figure 3

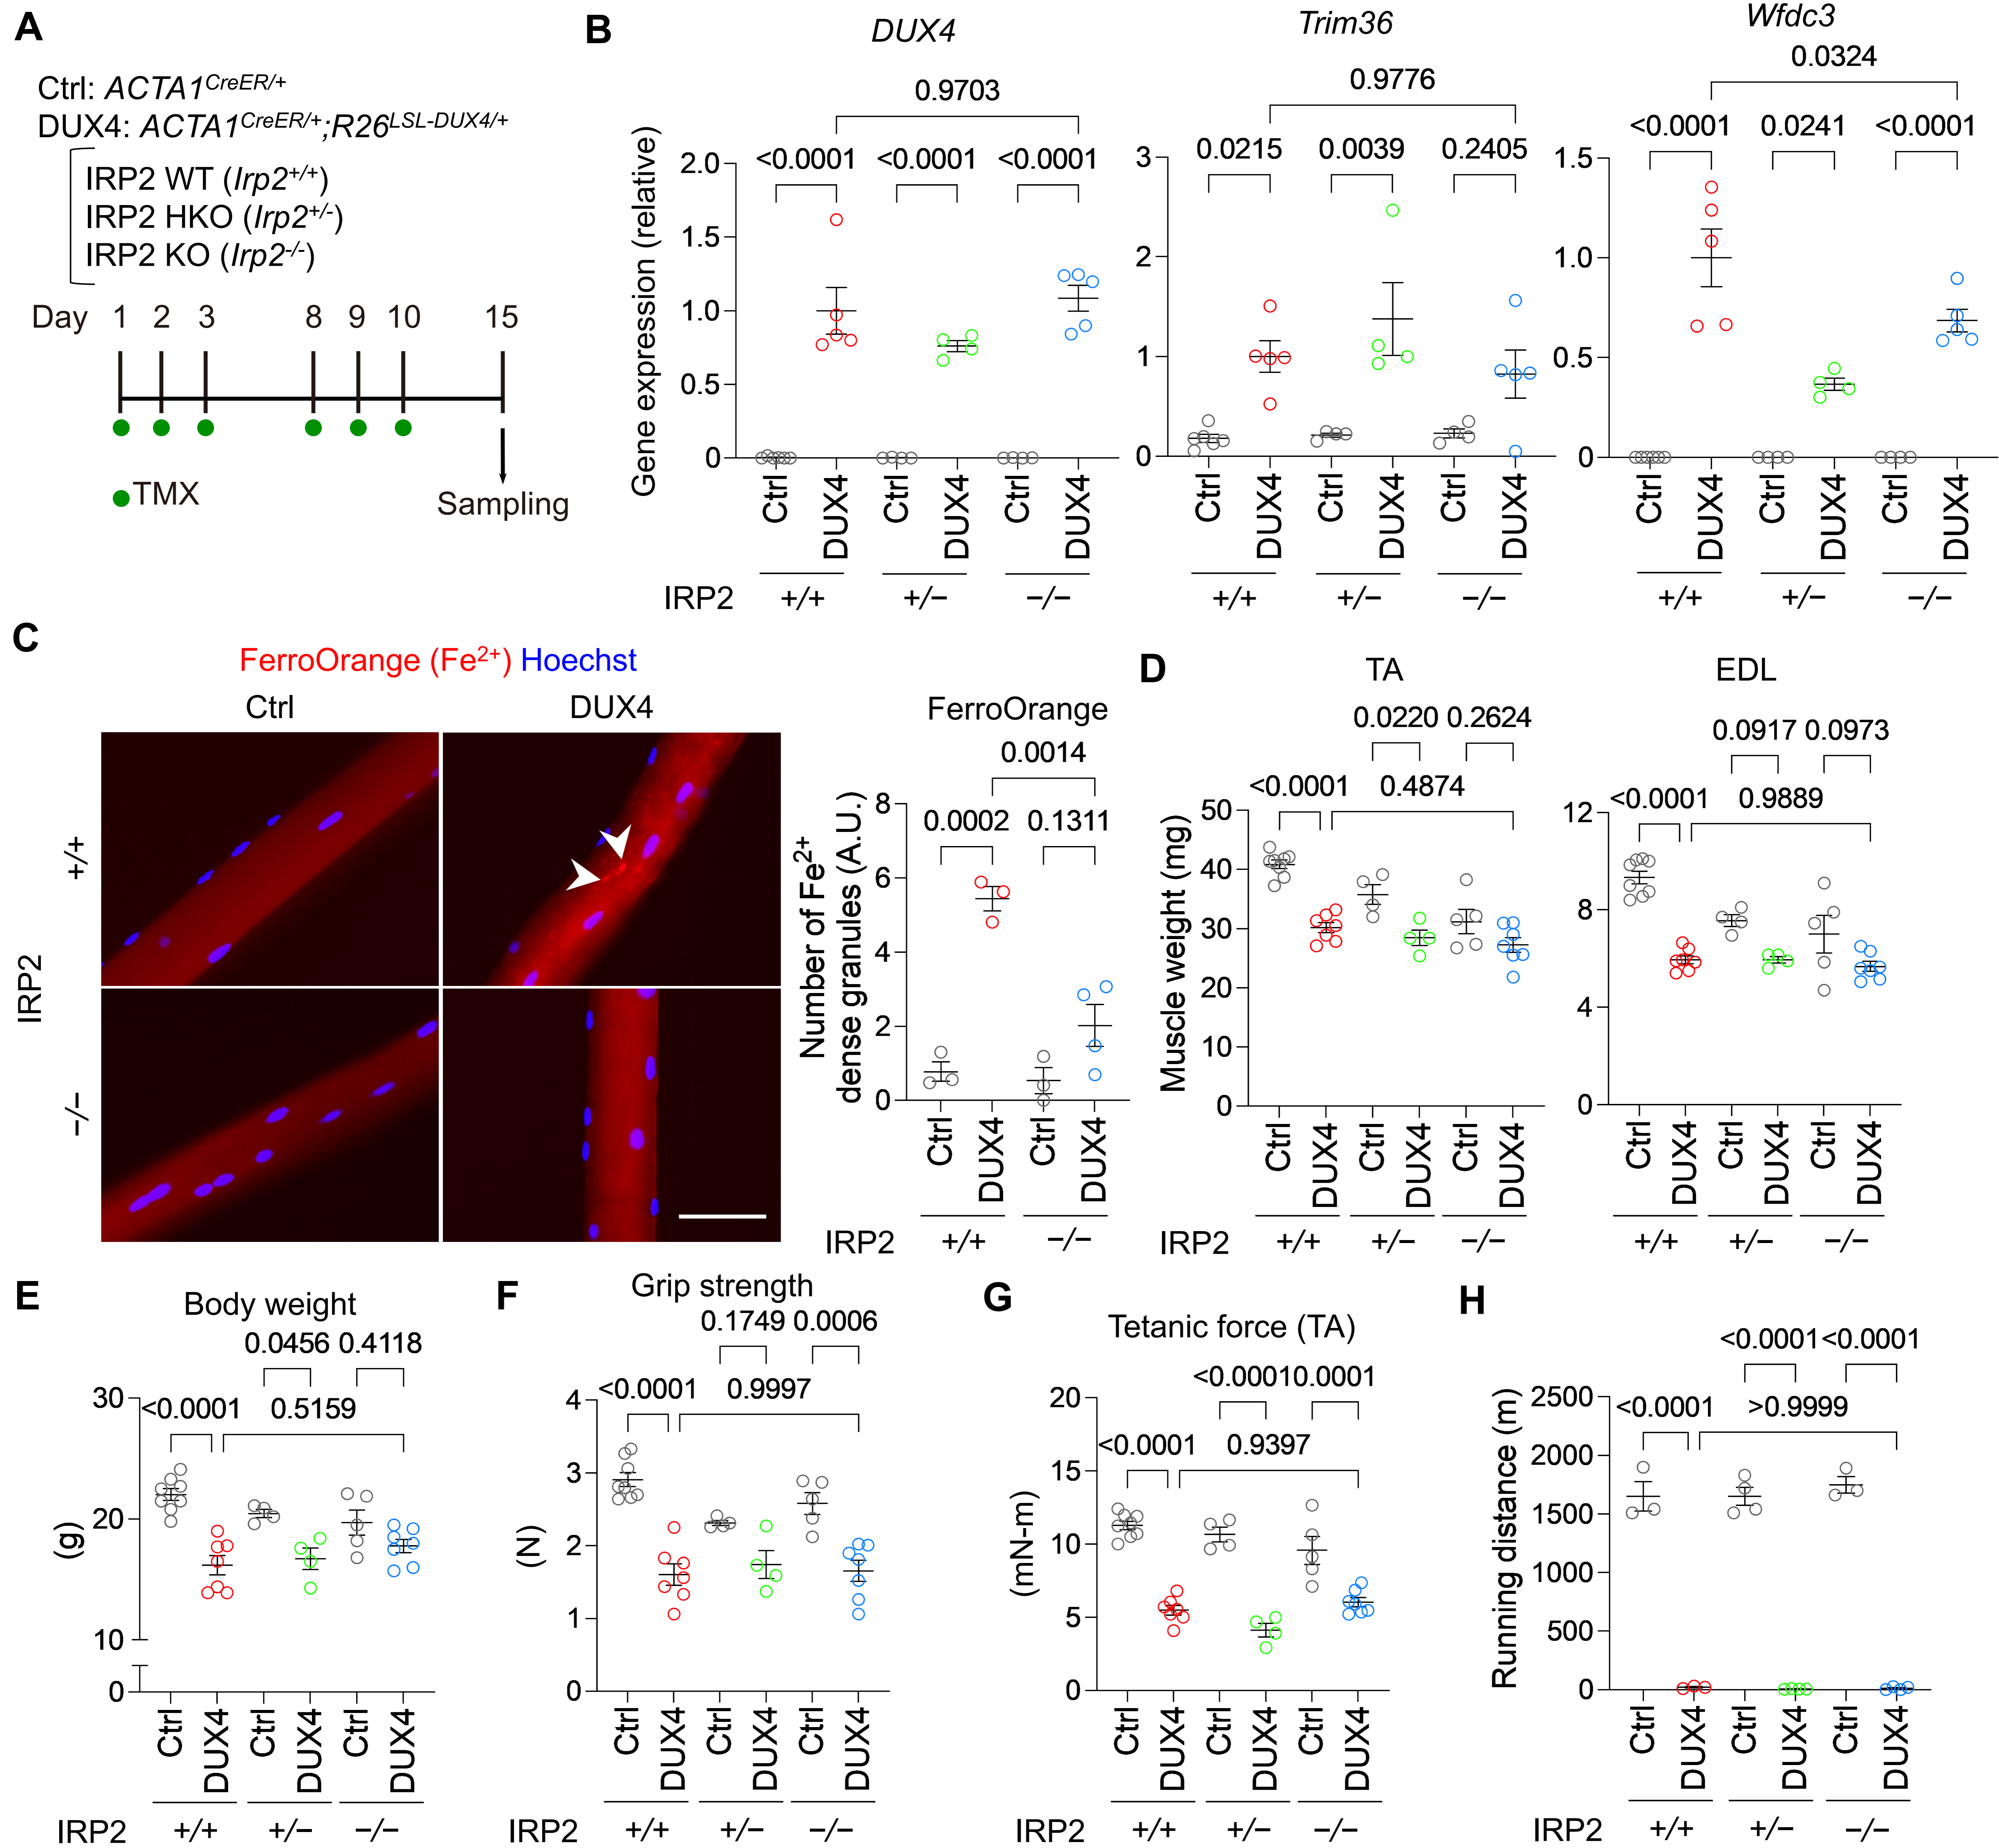

# Supplementary Figure 4

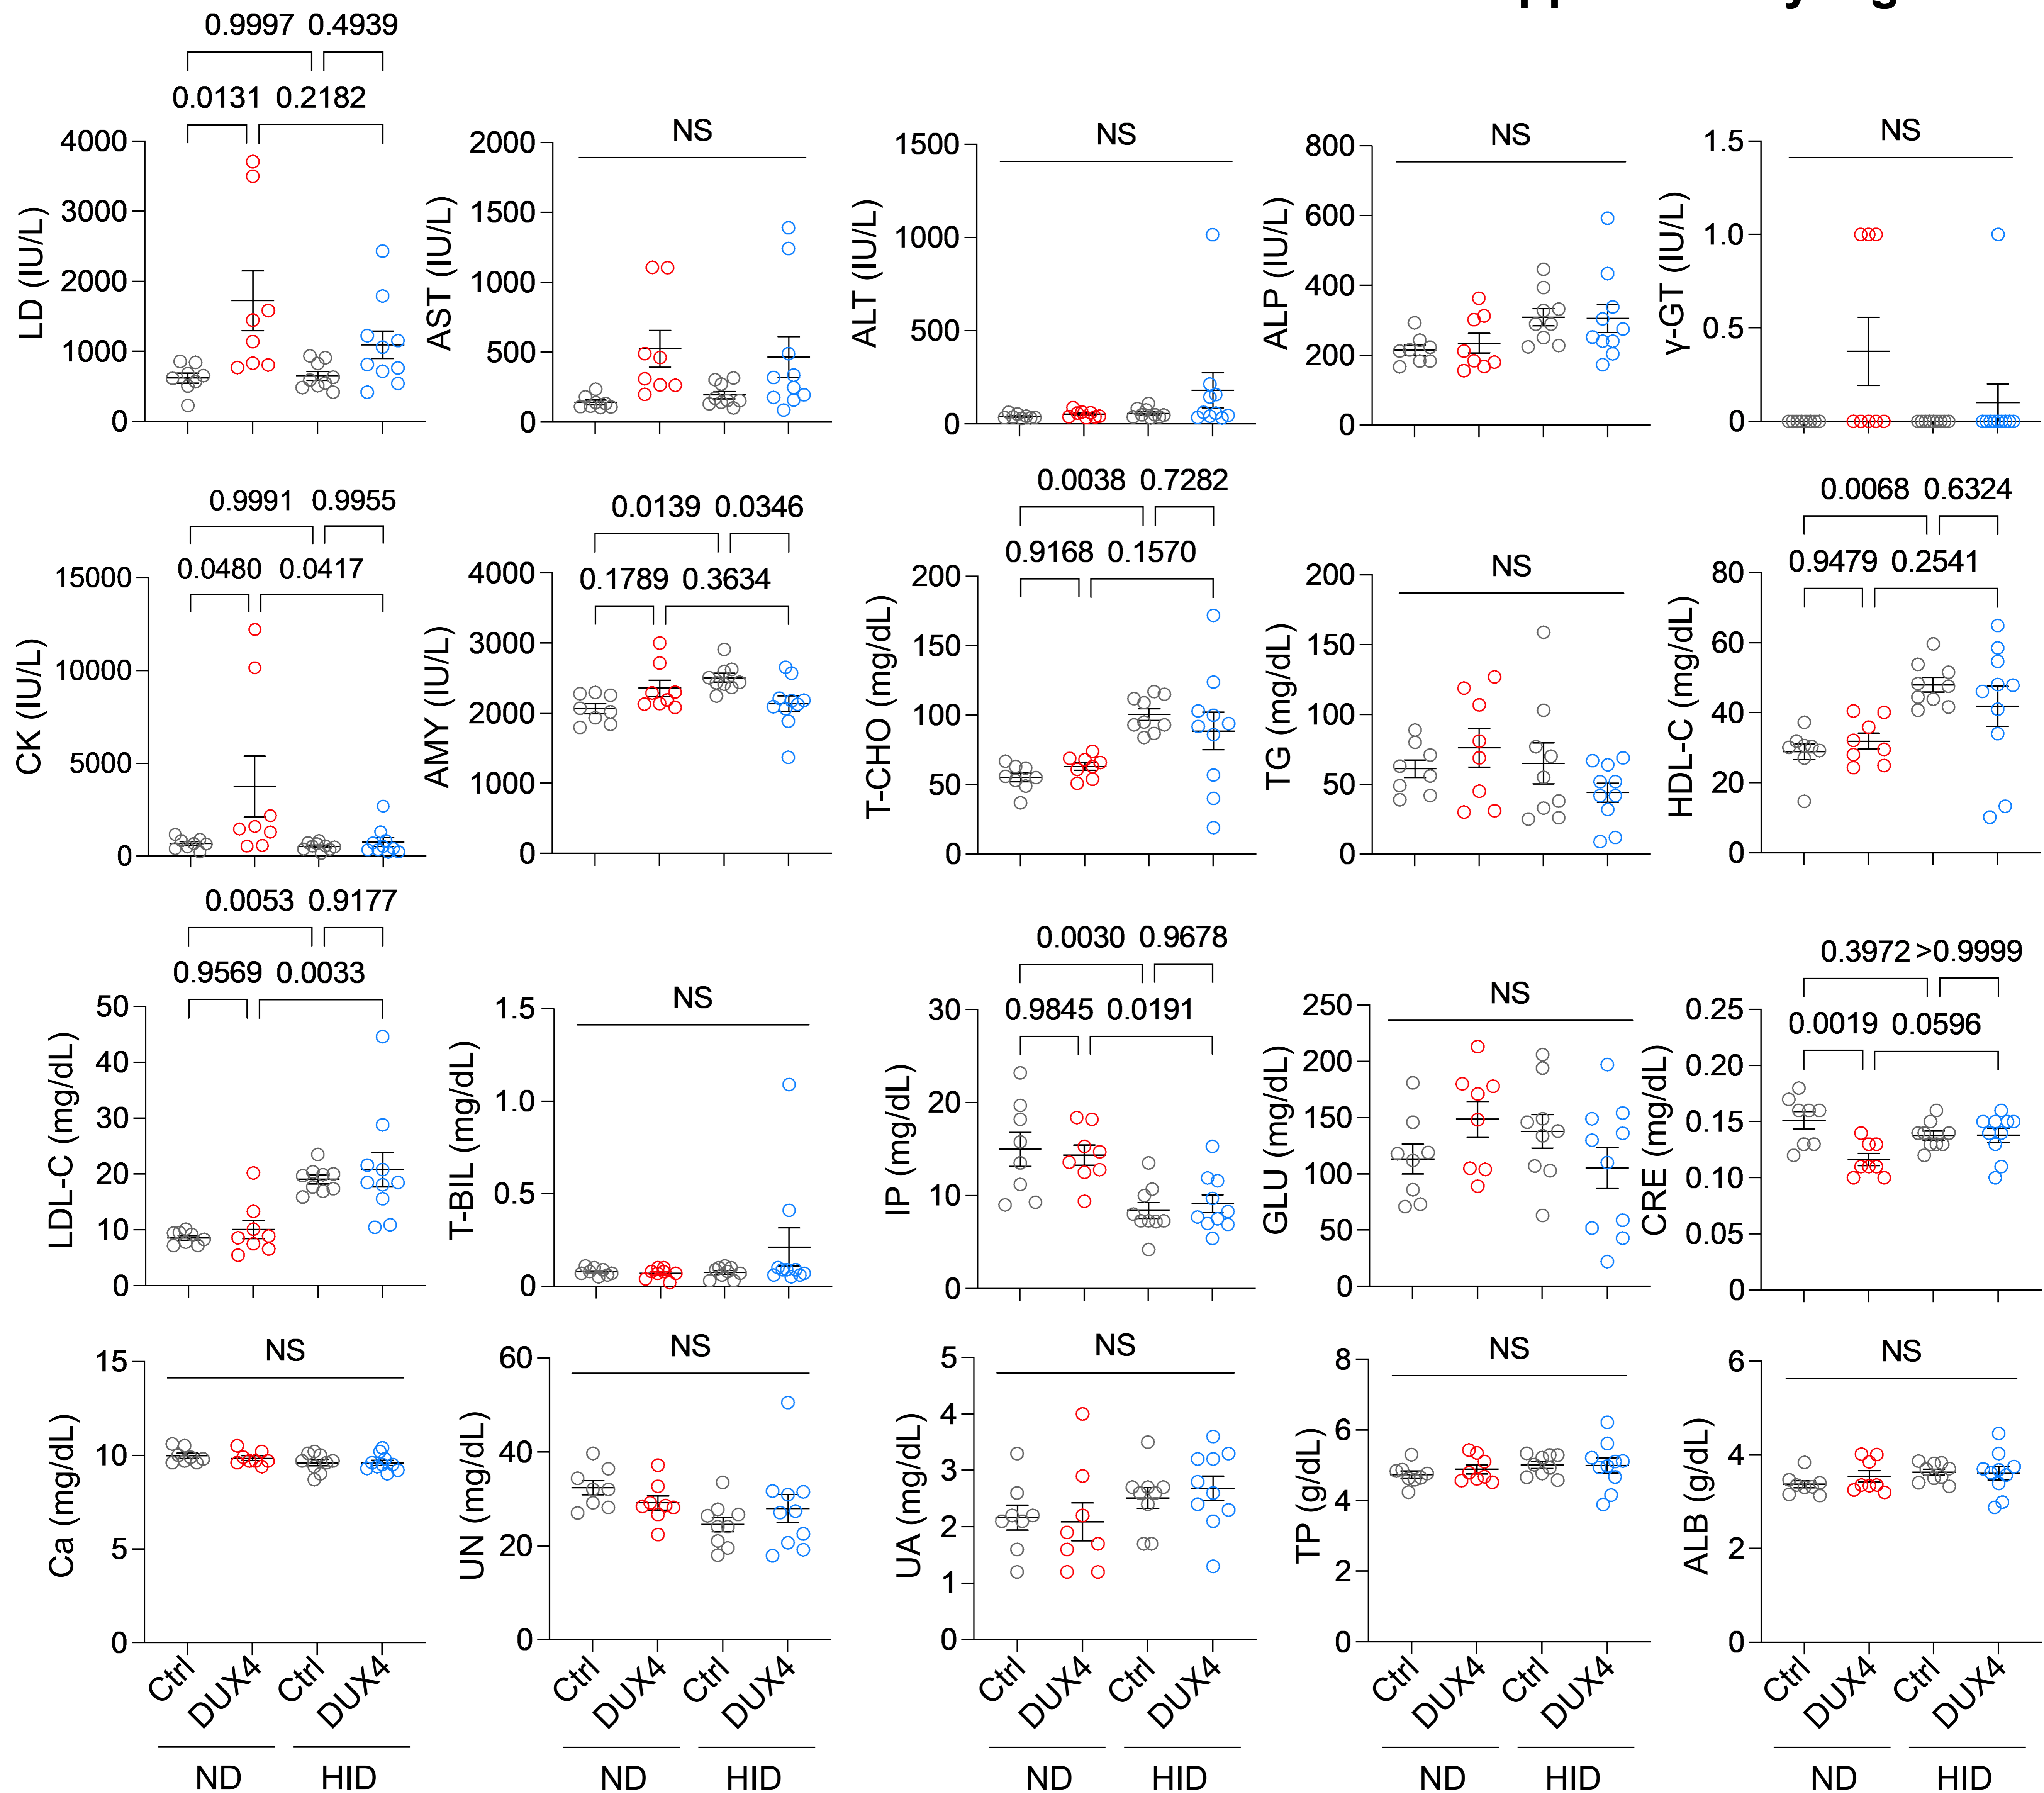

# Supplementary Figure 5

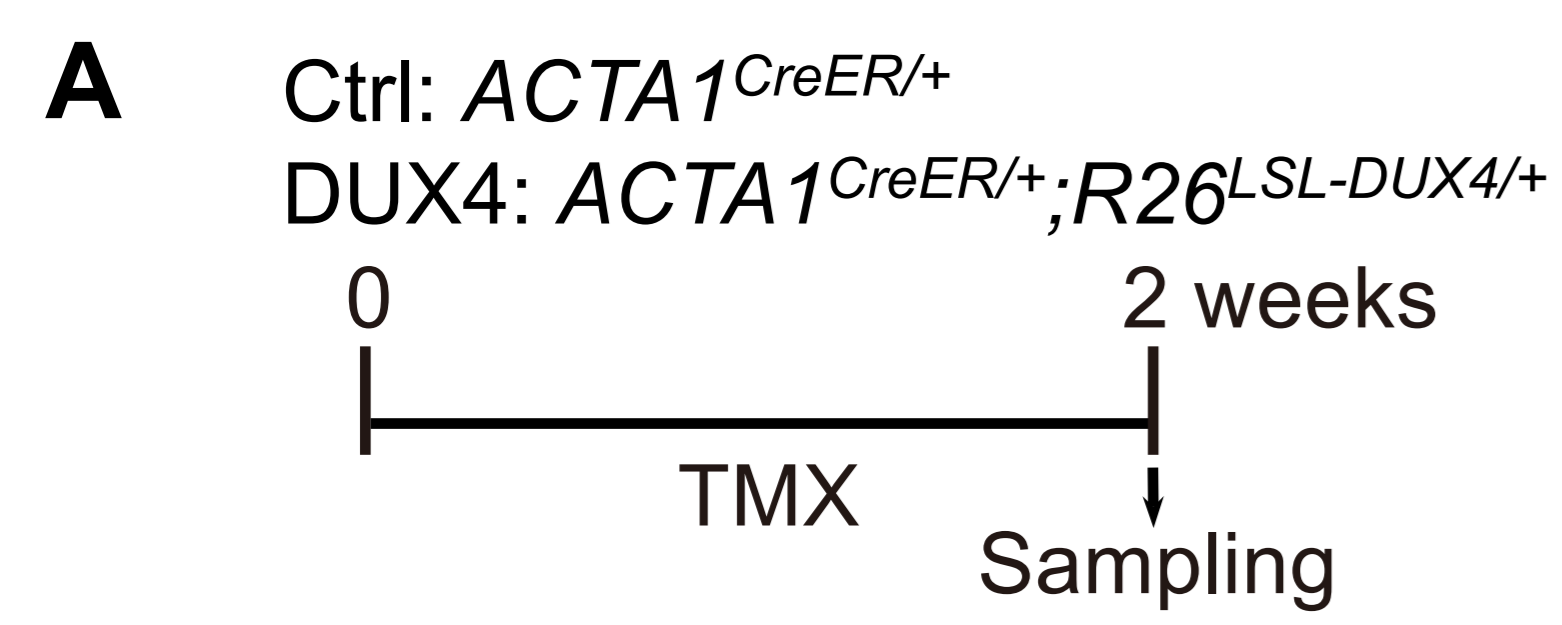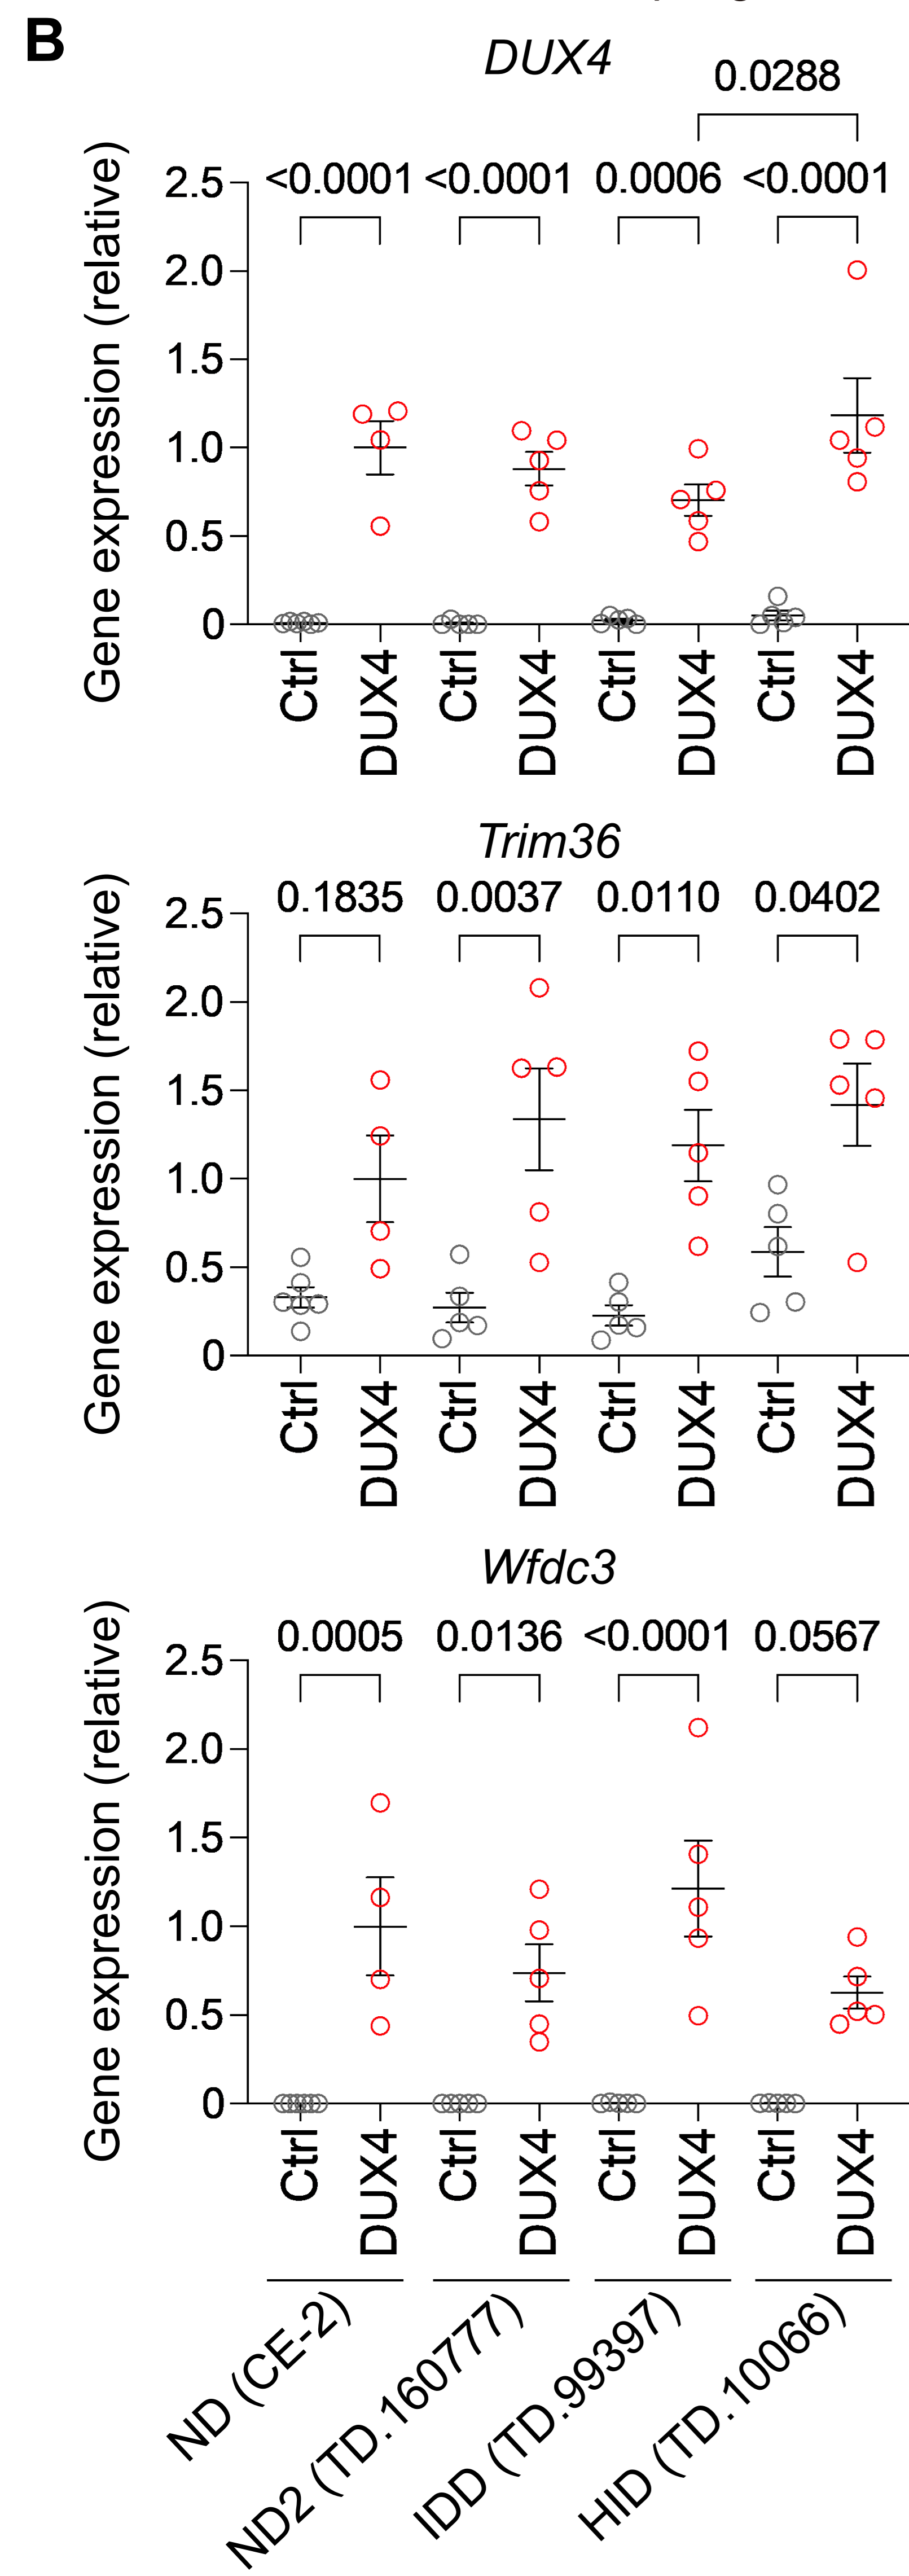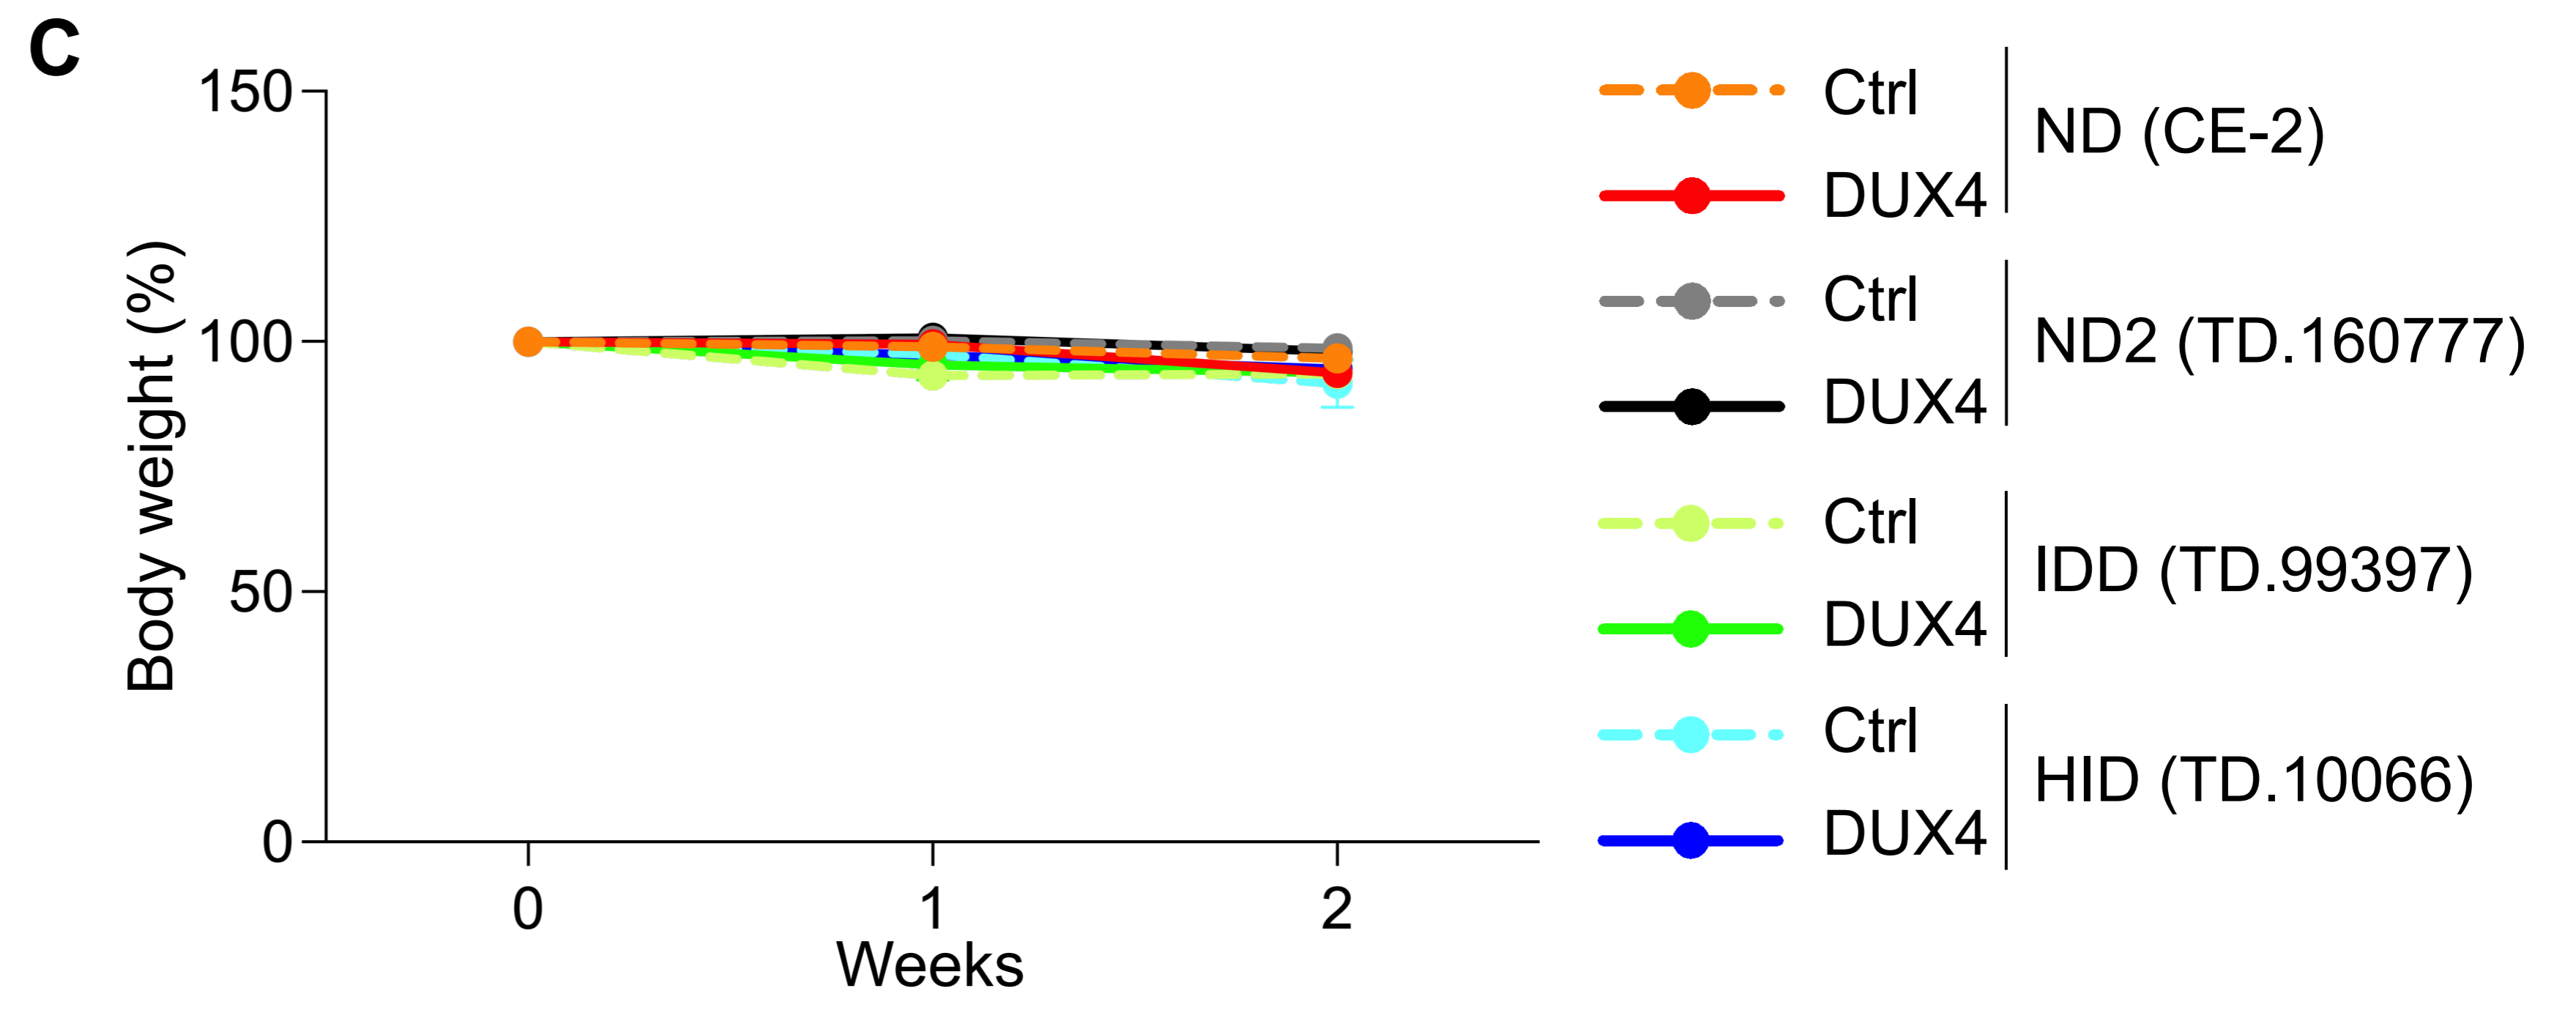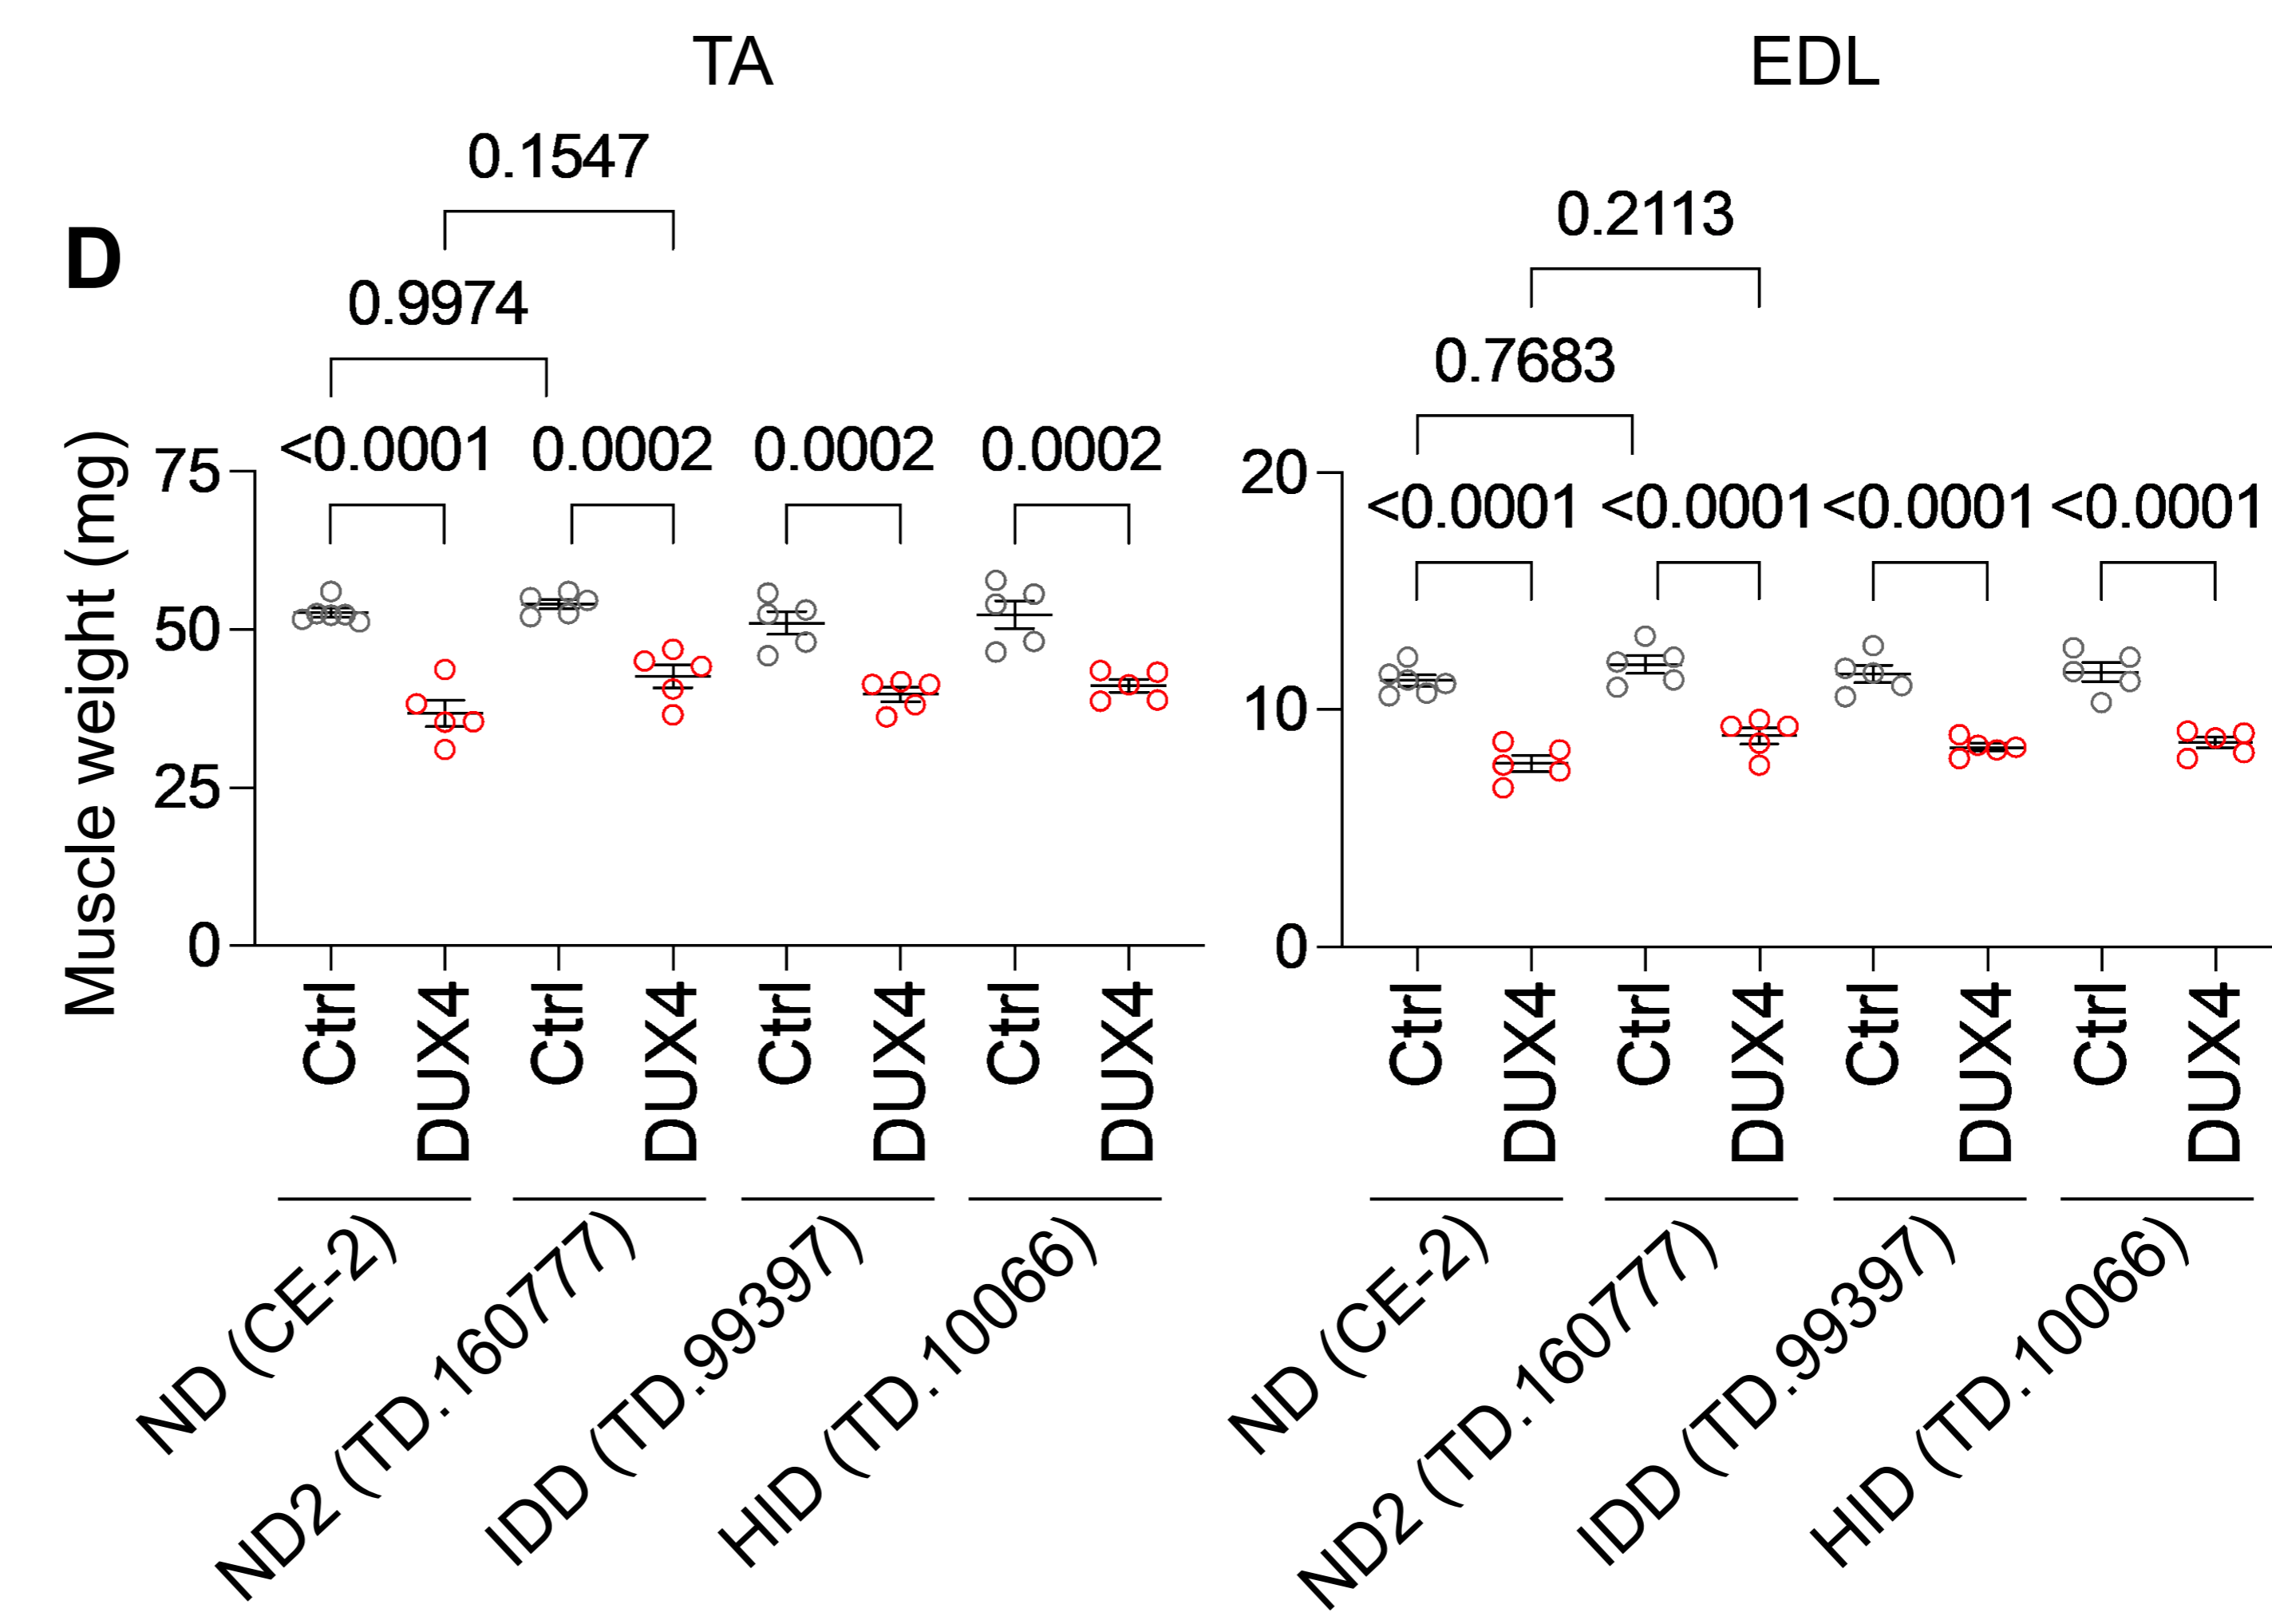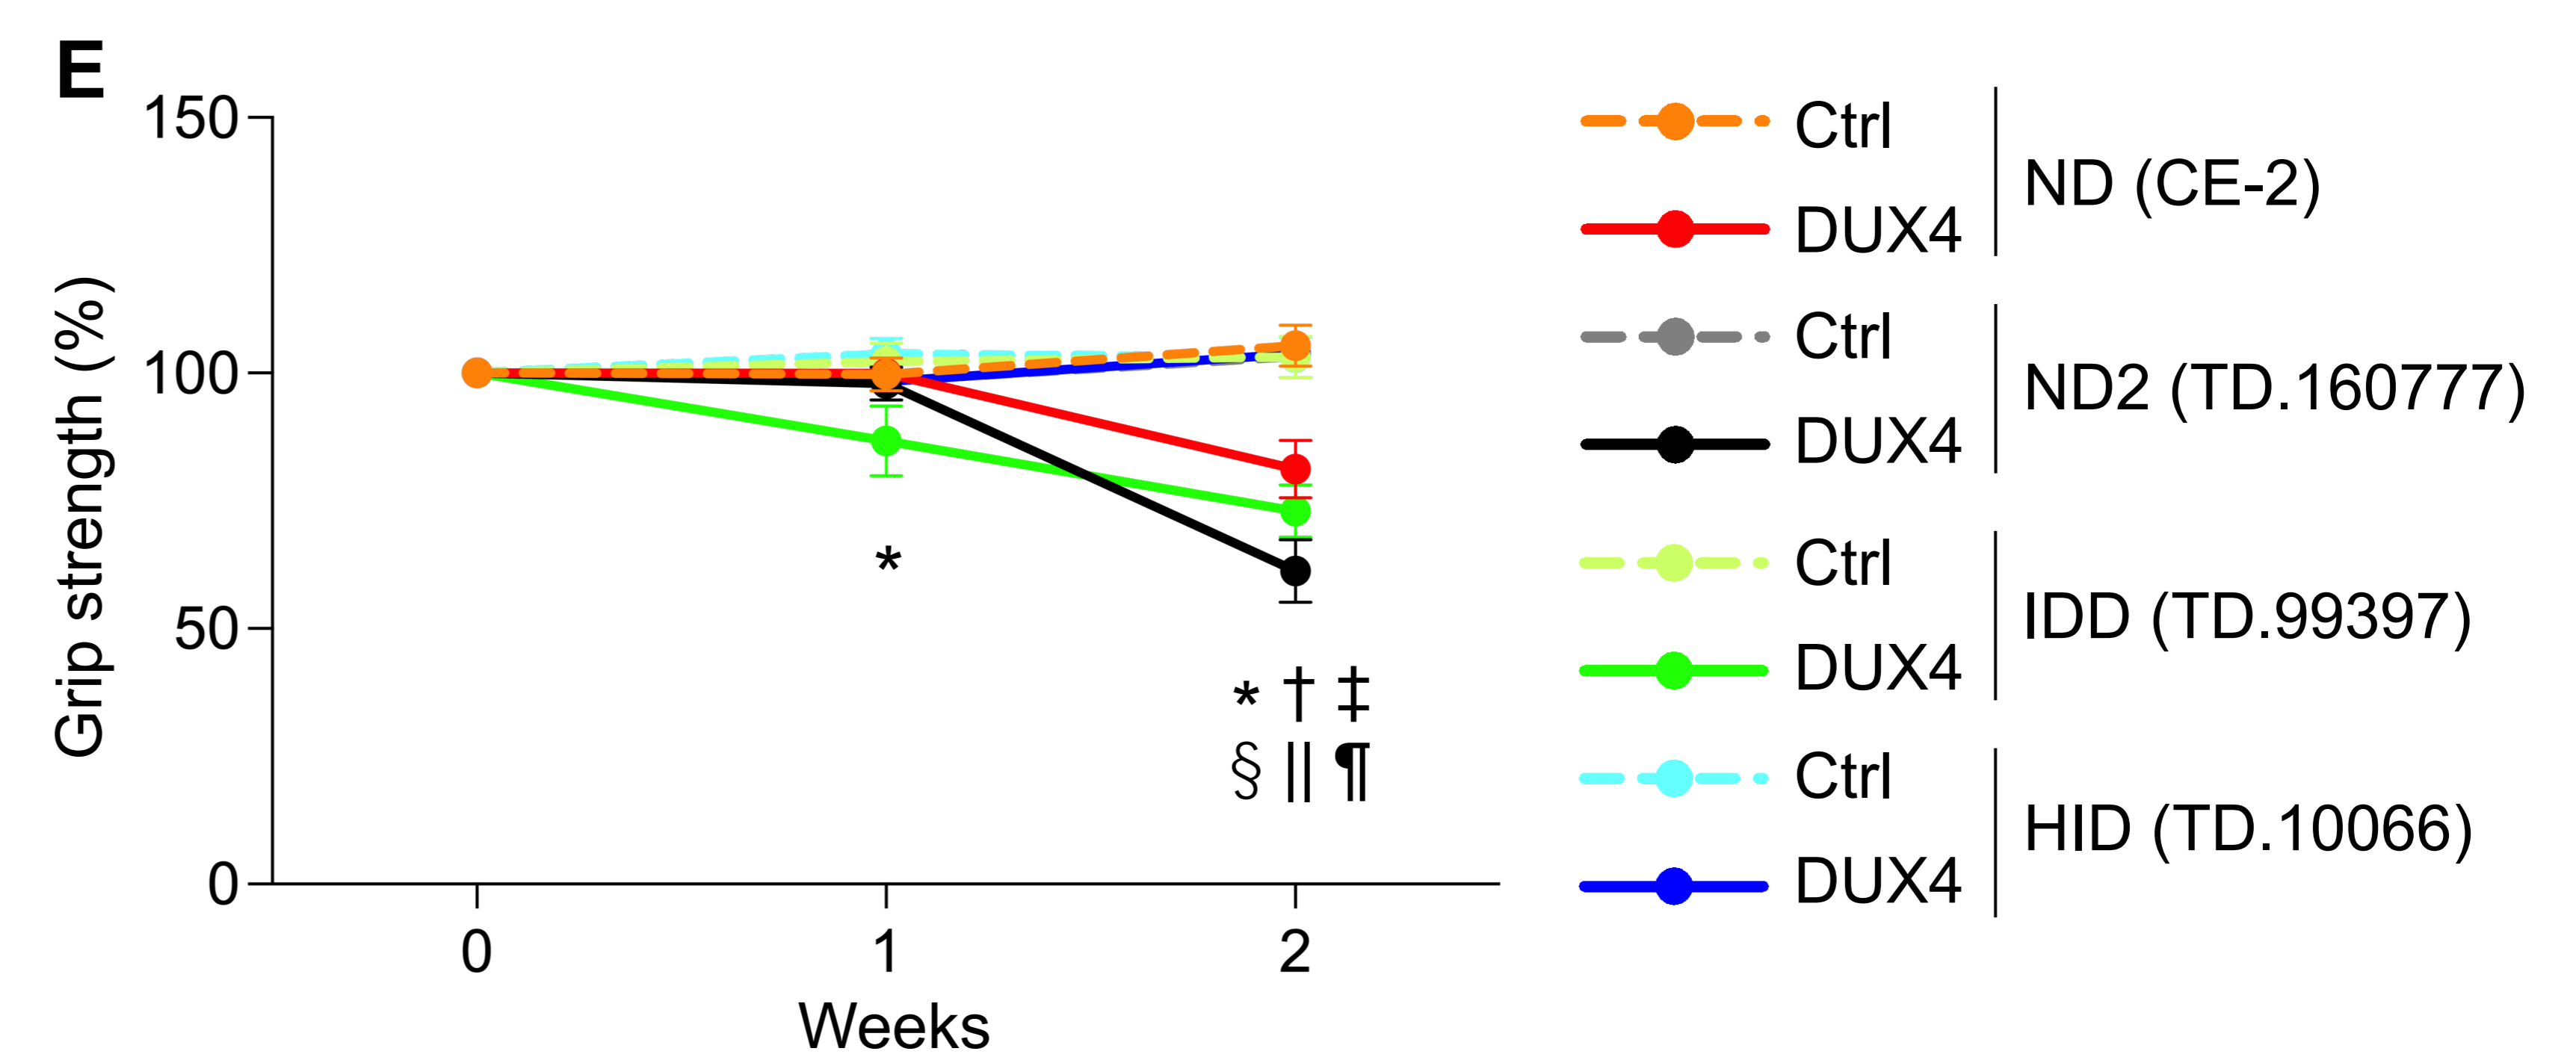

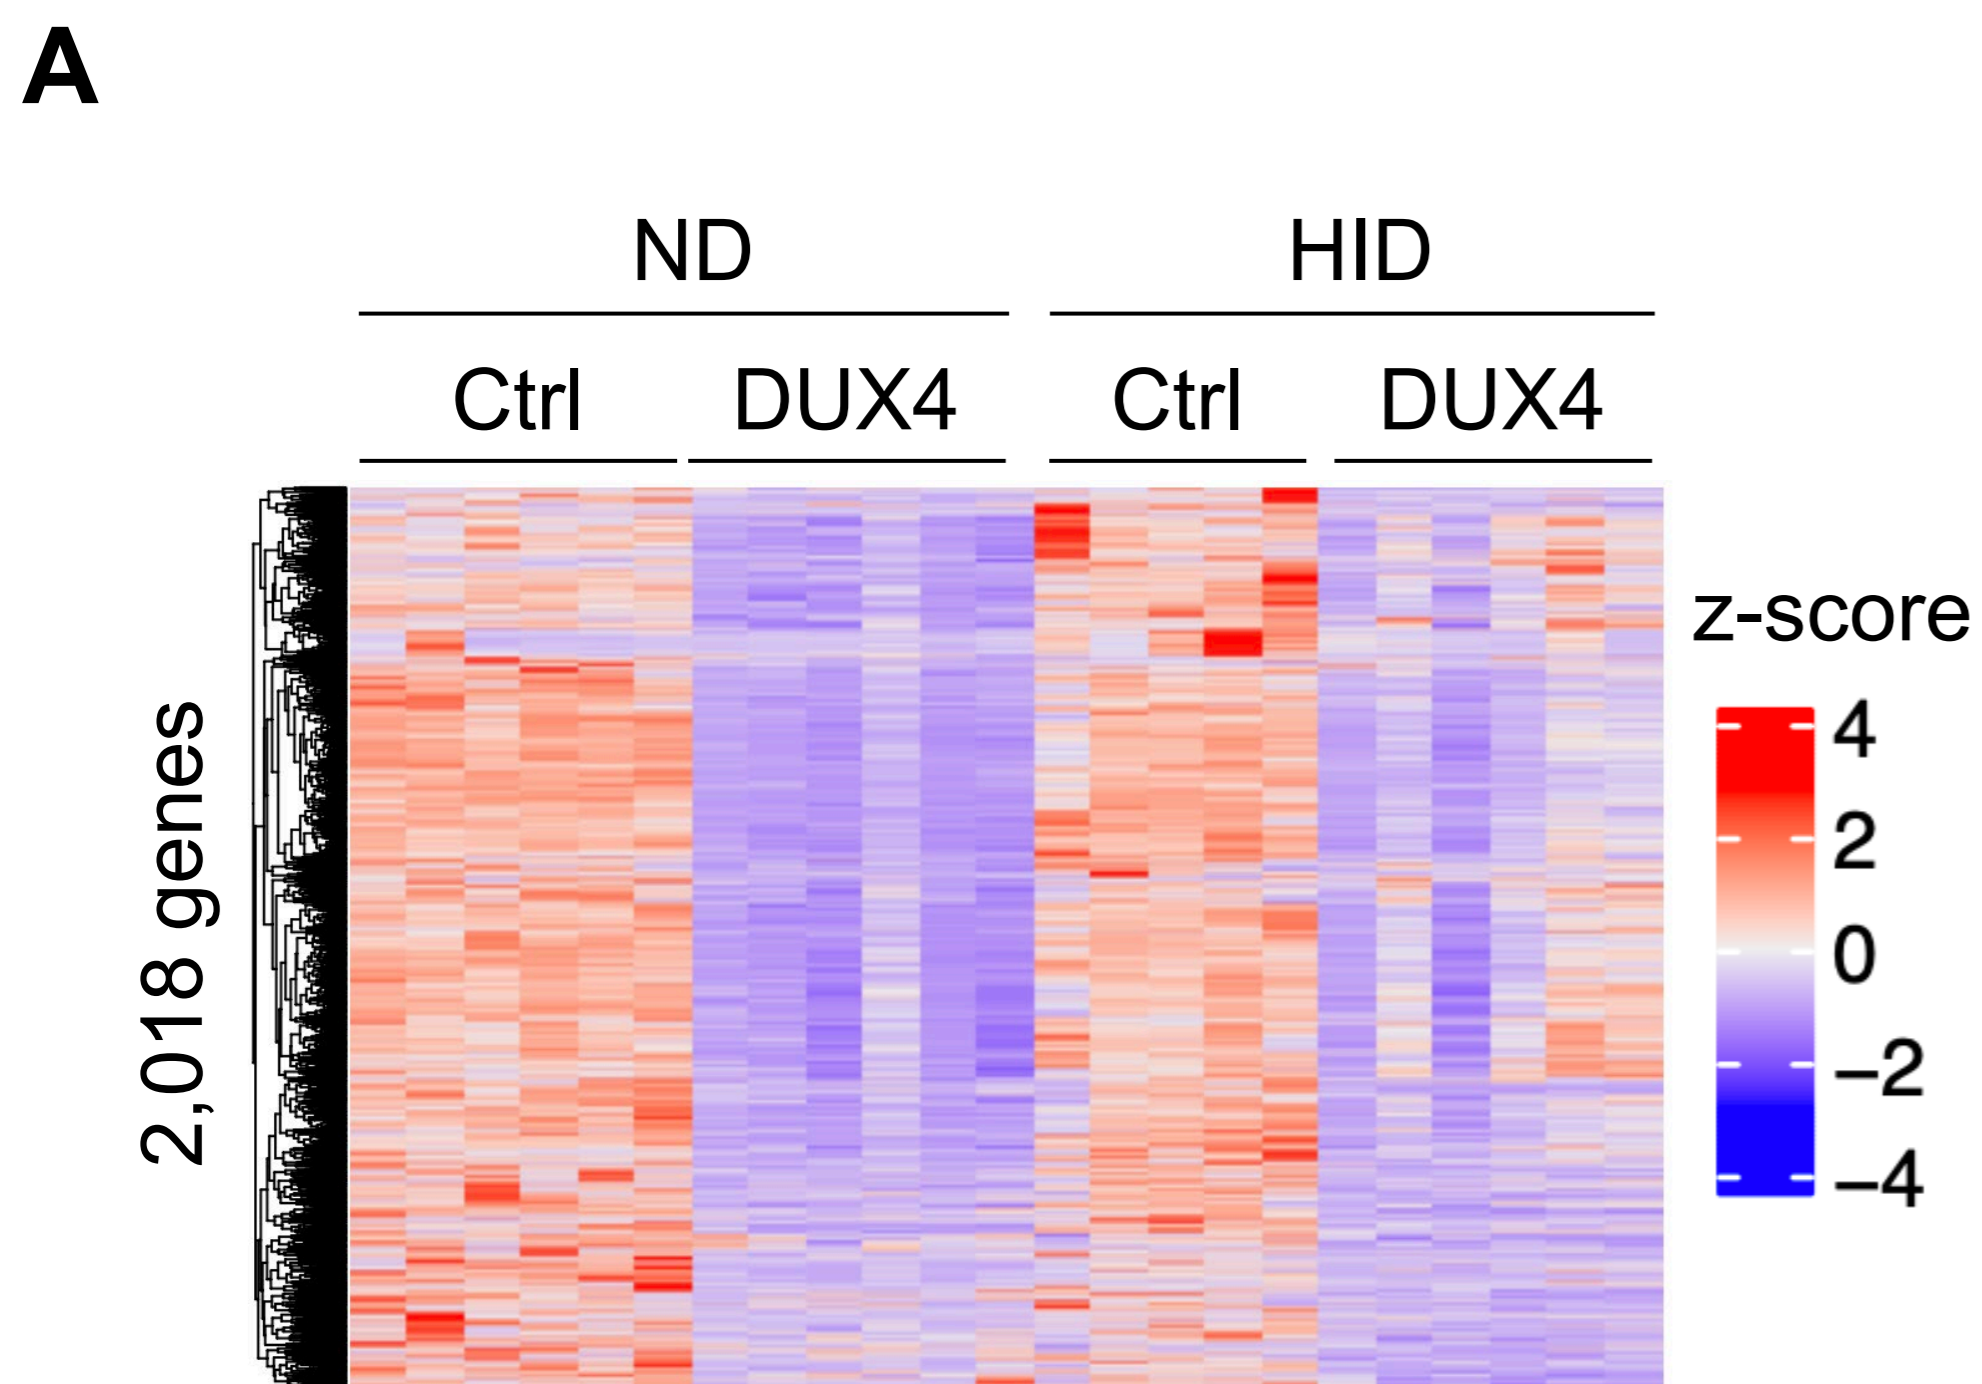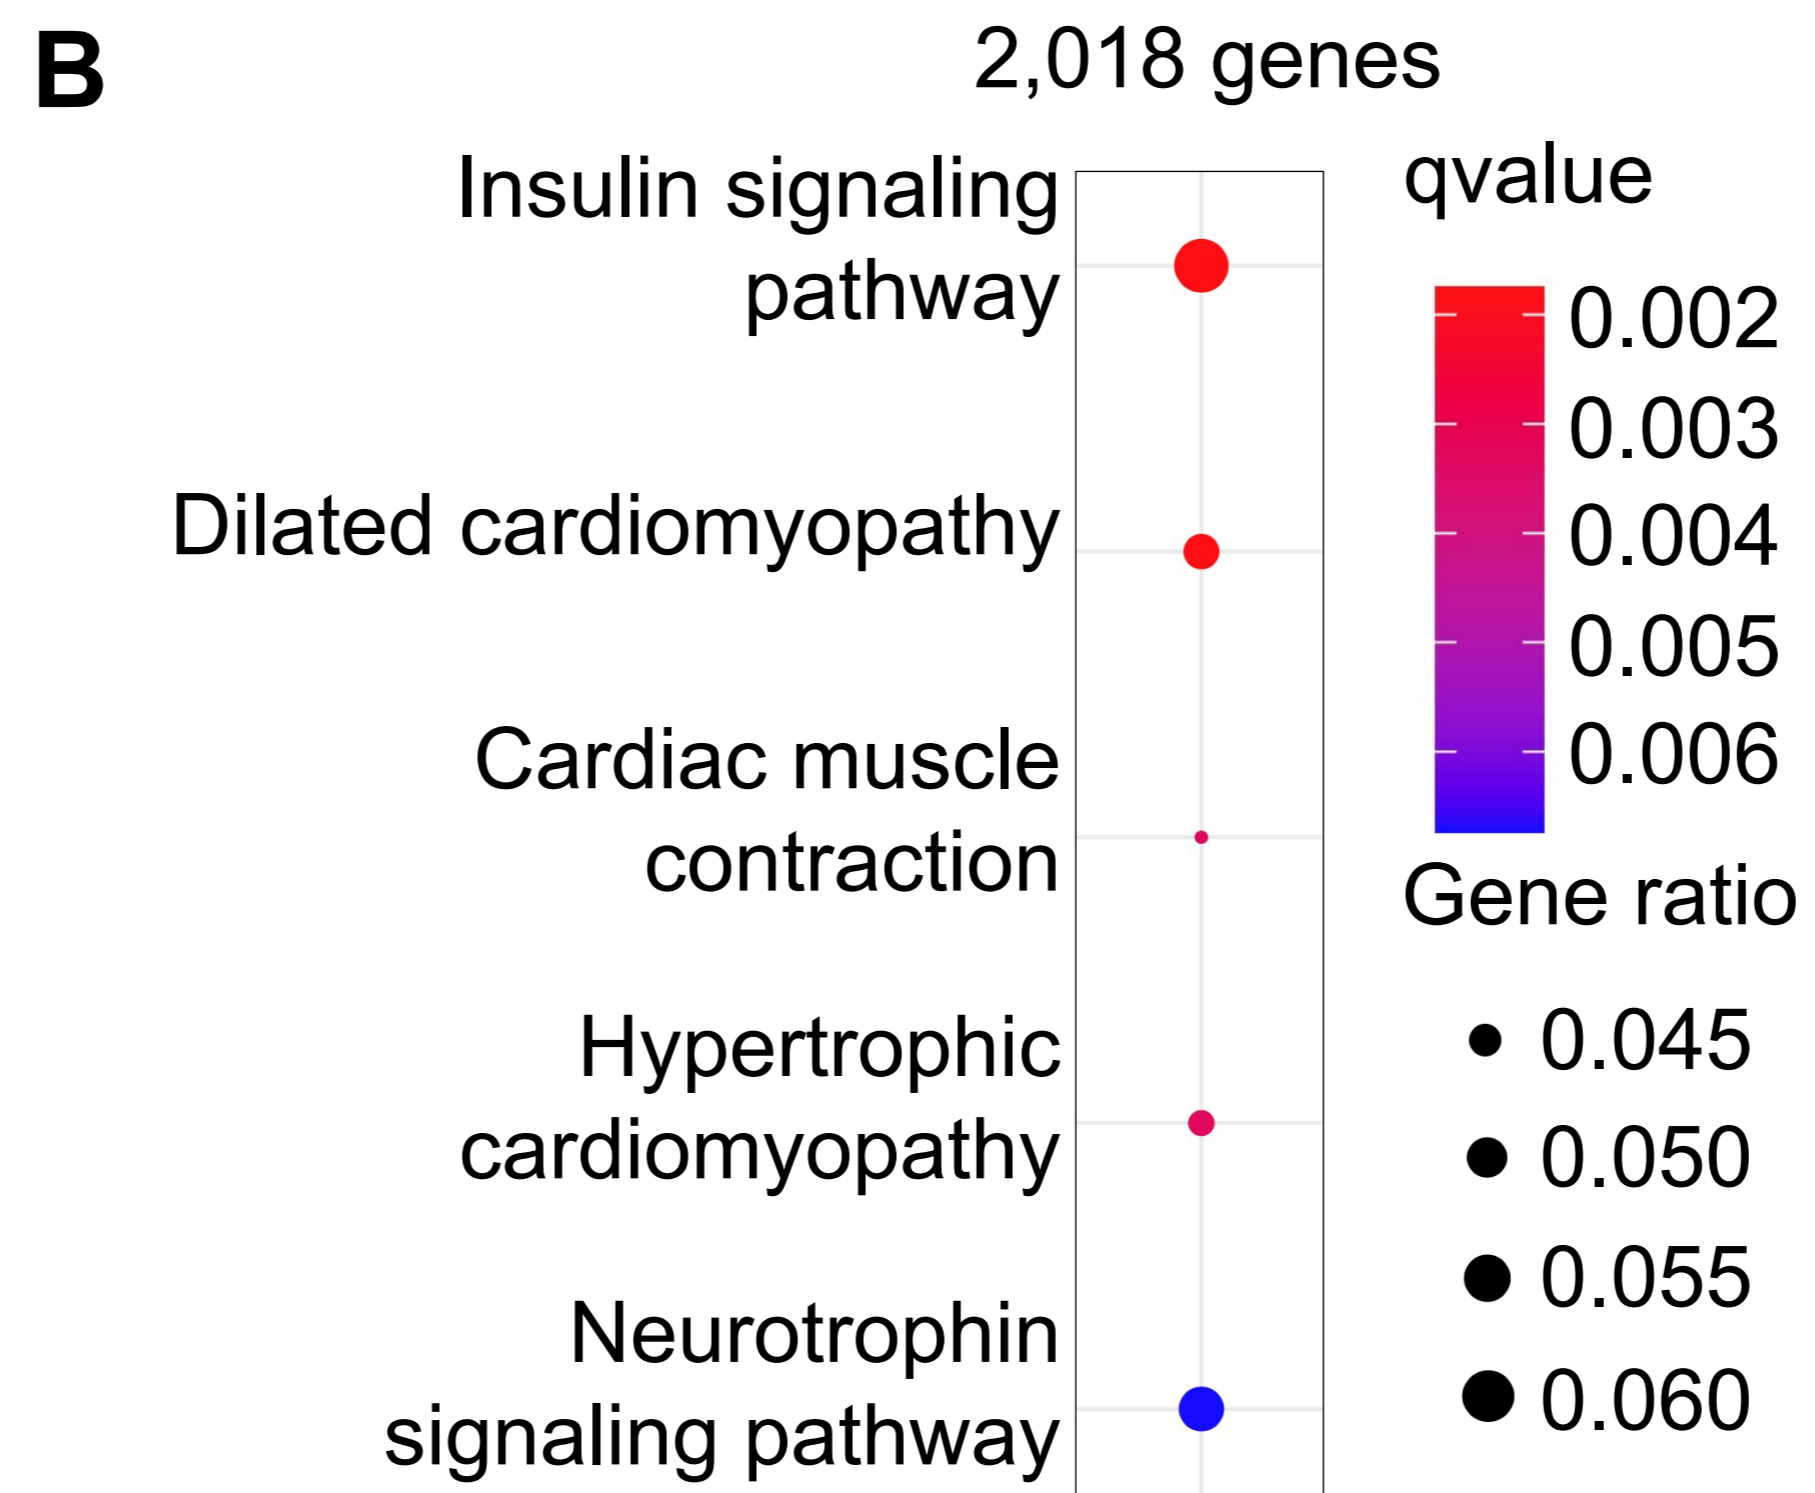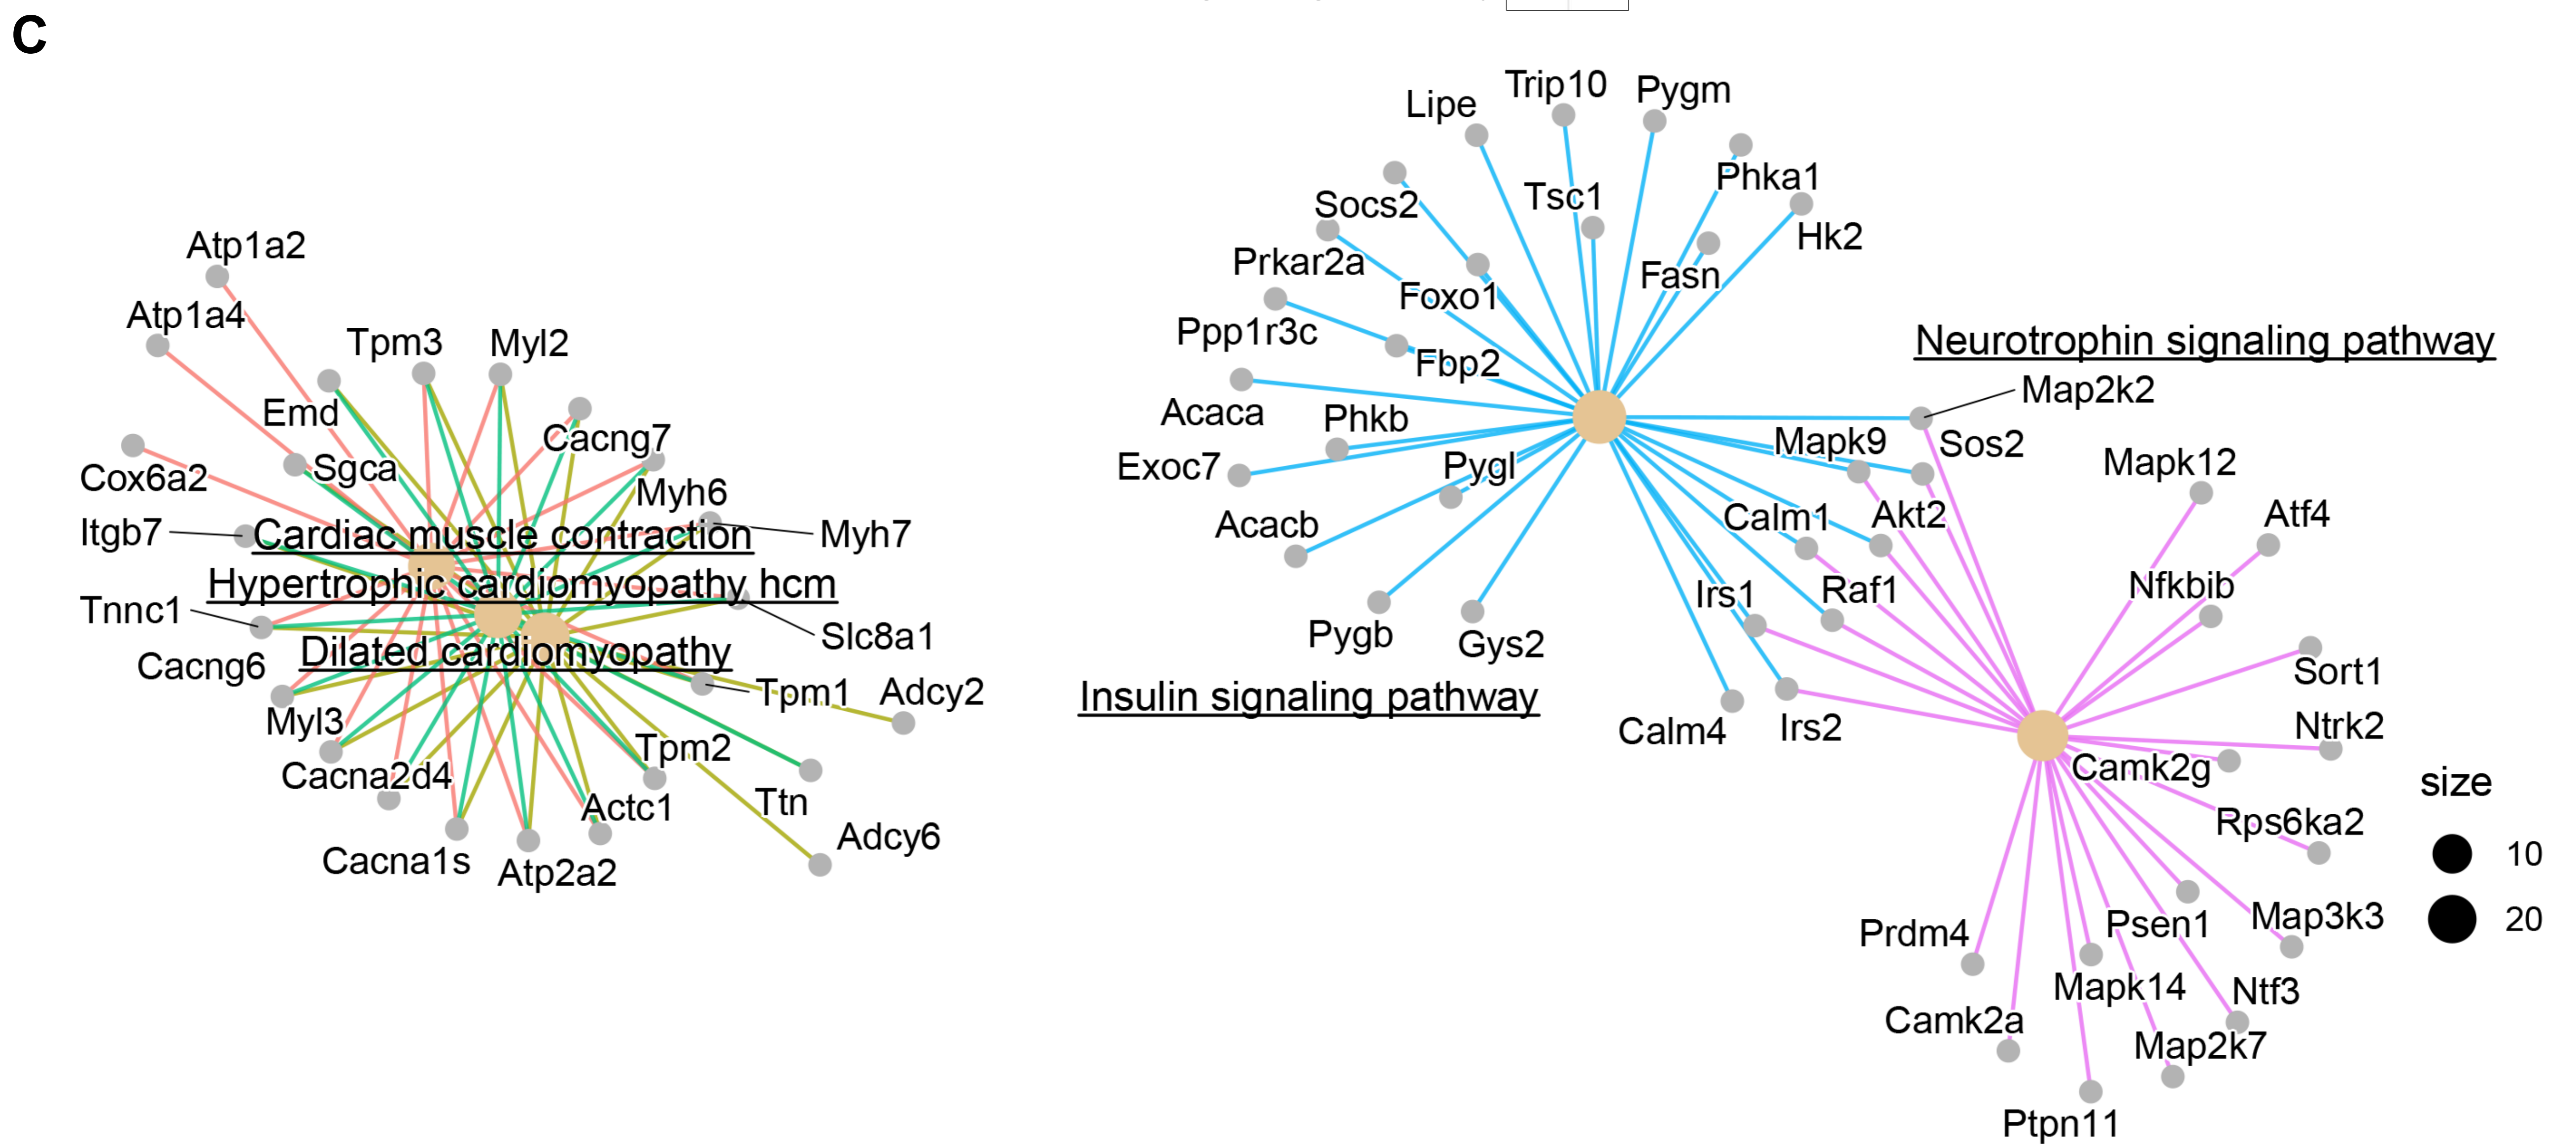

**A**  
Myoblasts isolated from  
*ACTA1<sup>CreER/+</sup>;R26<sup>LSL-DUX4/+</sup>* mice

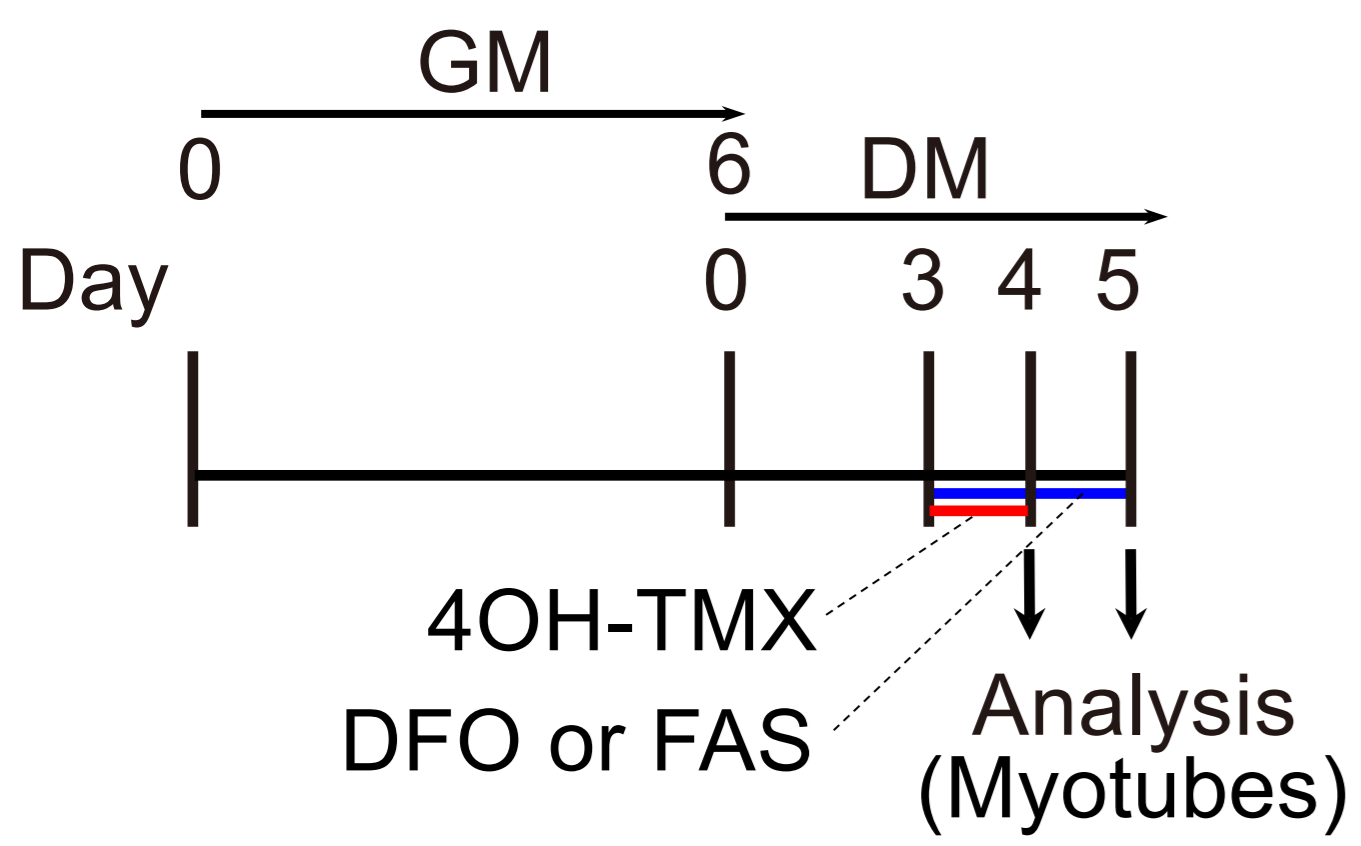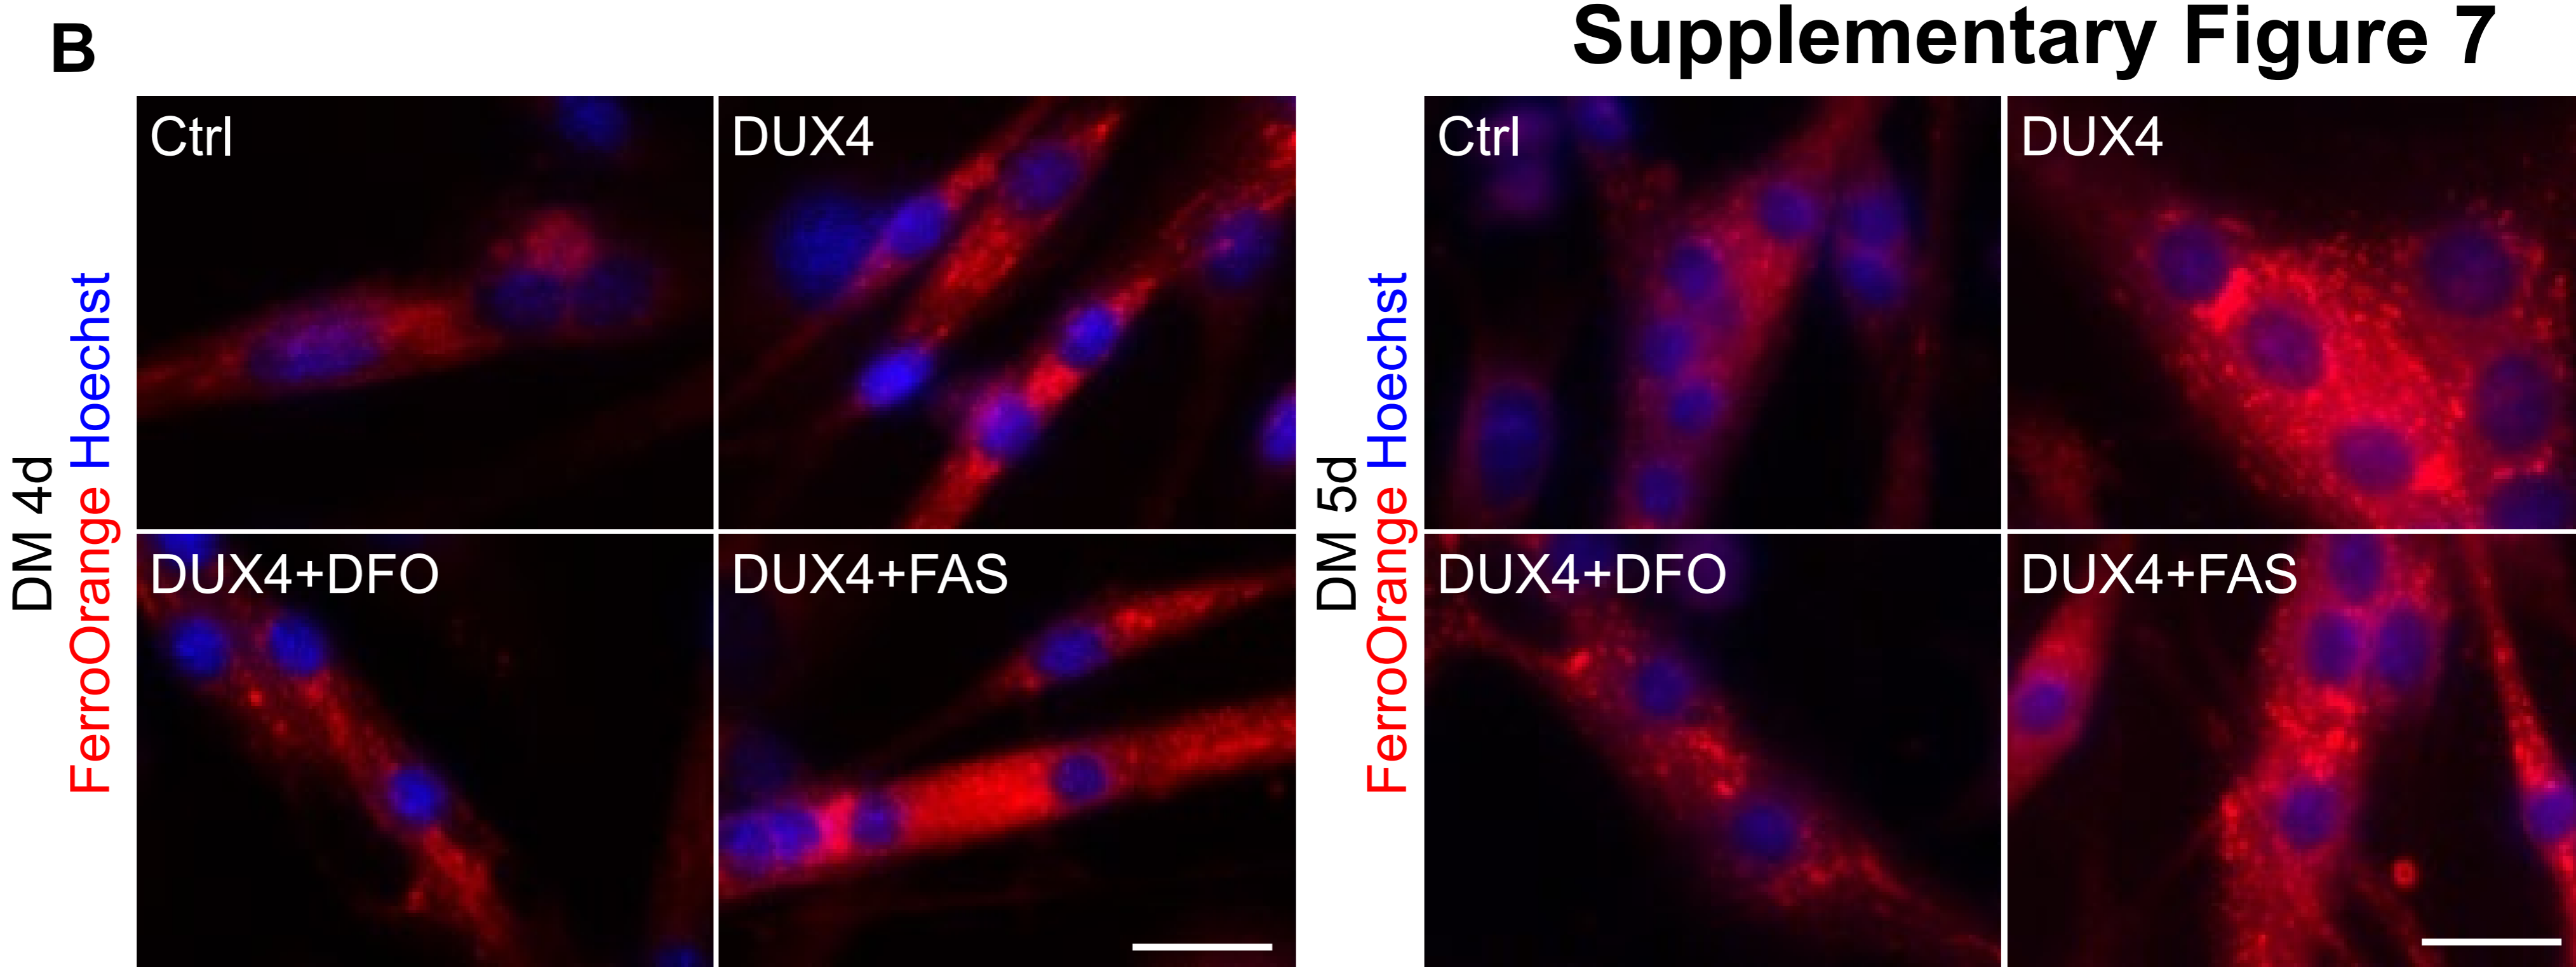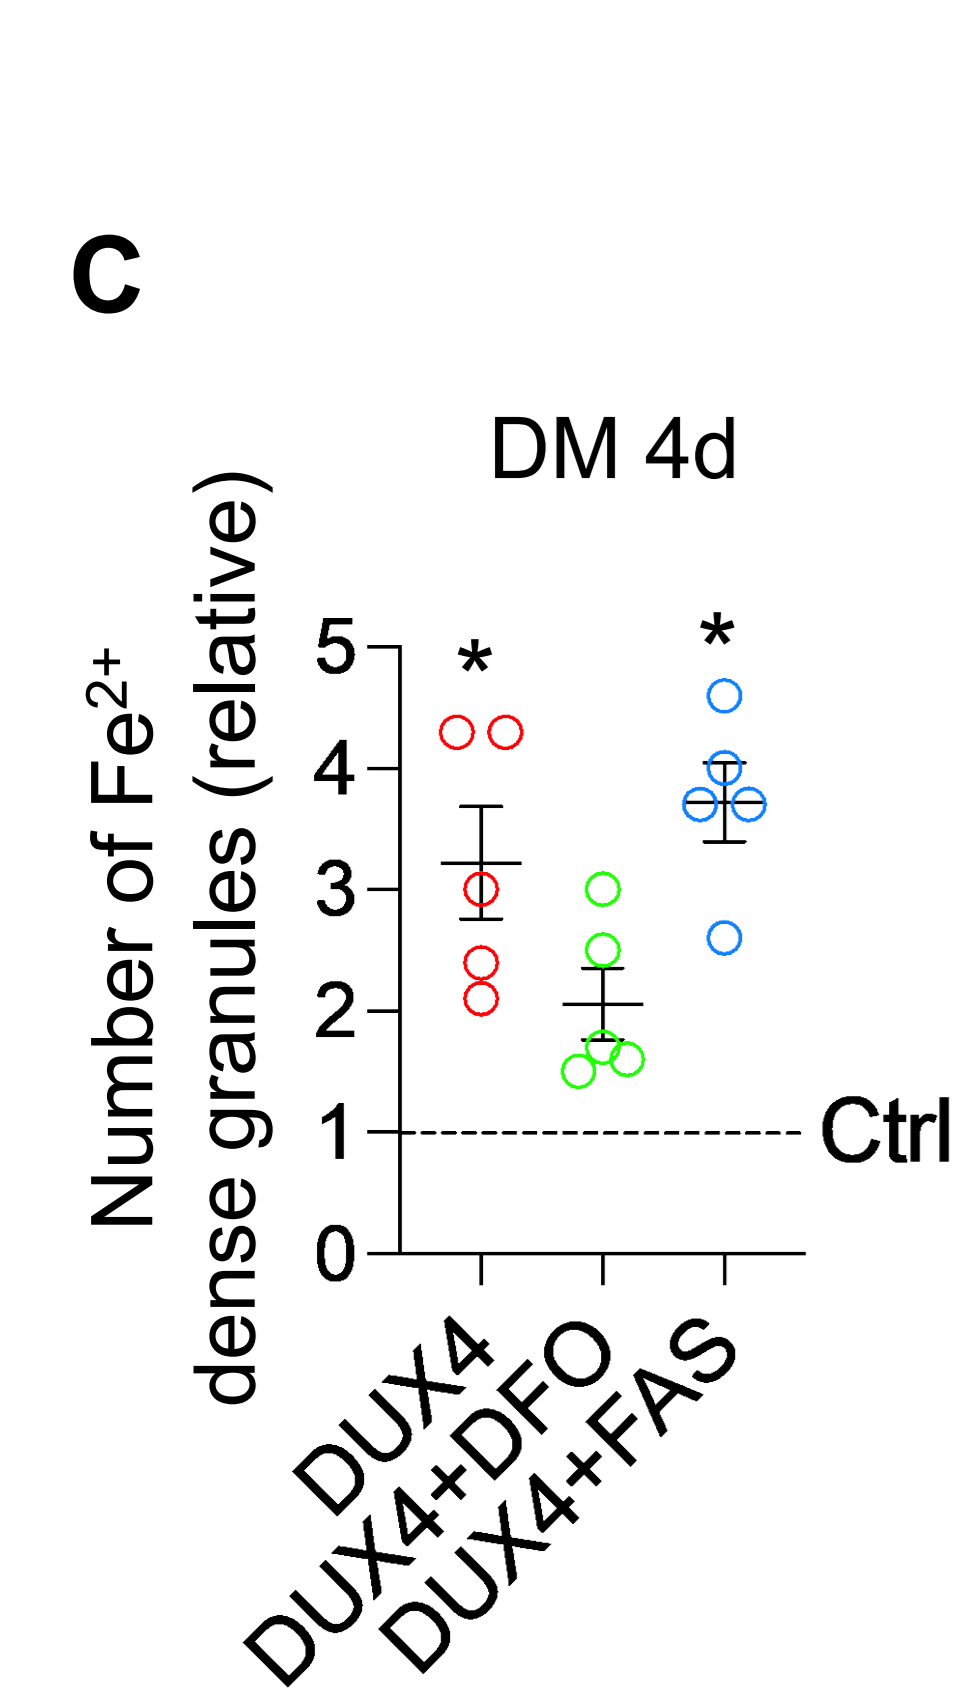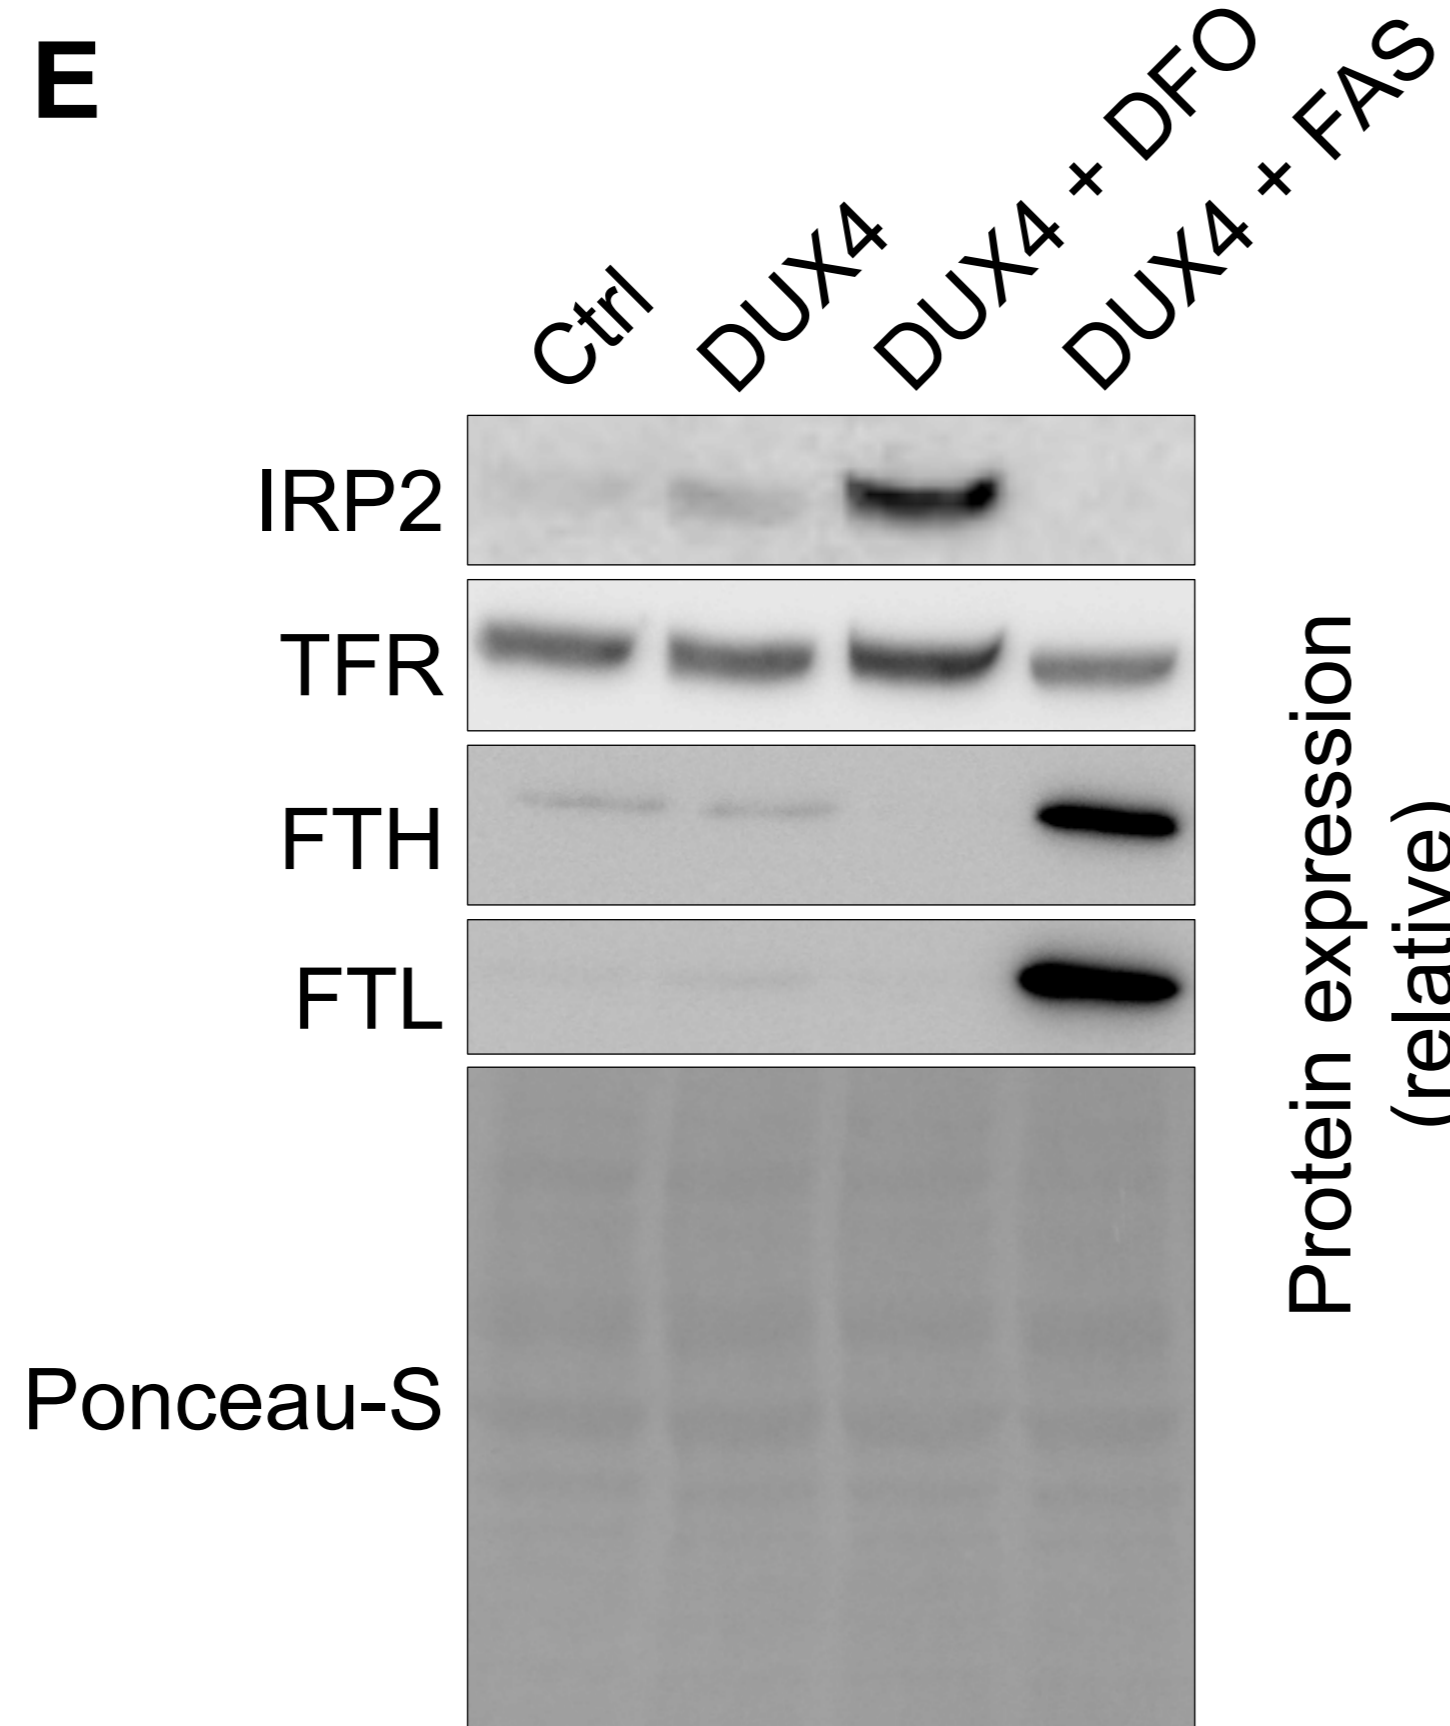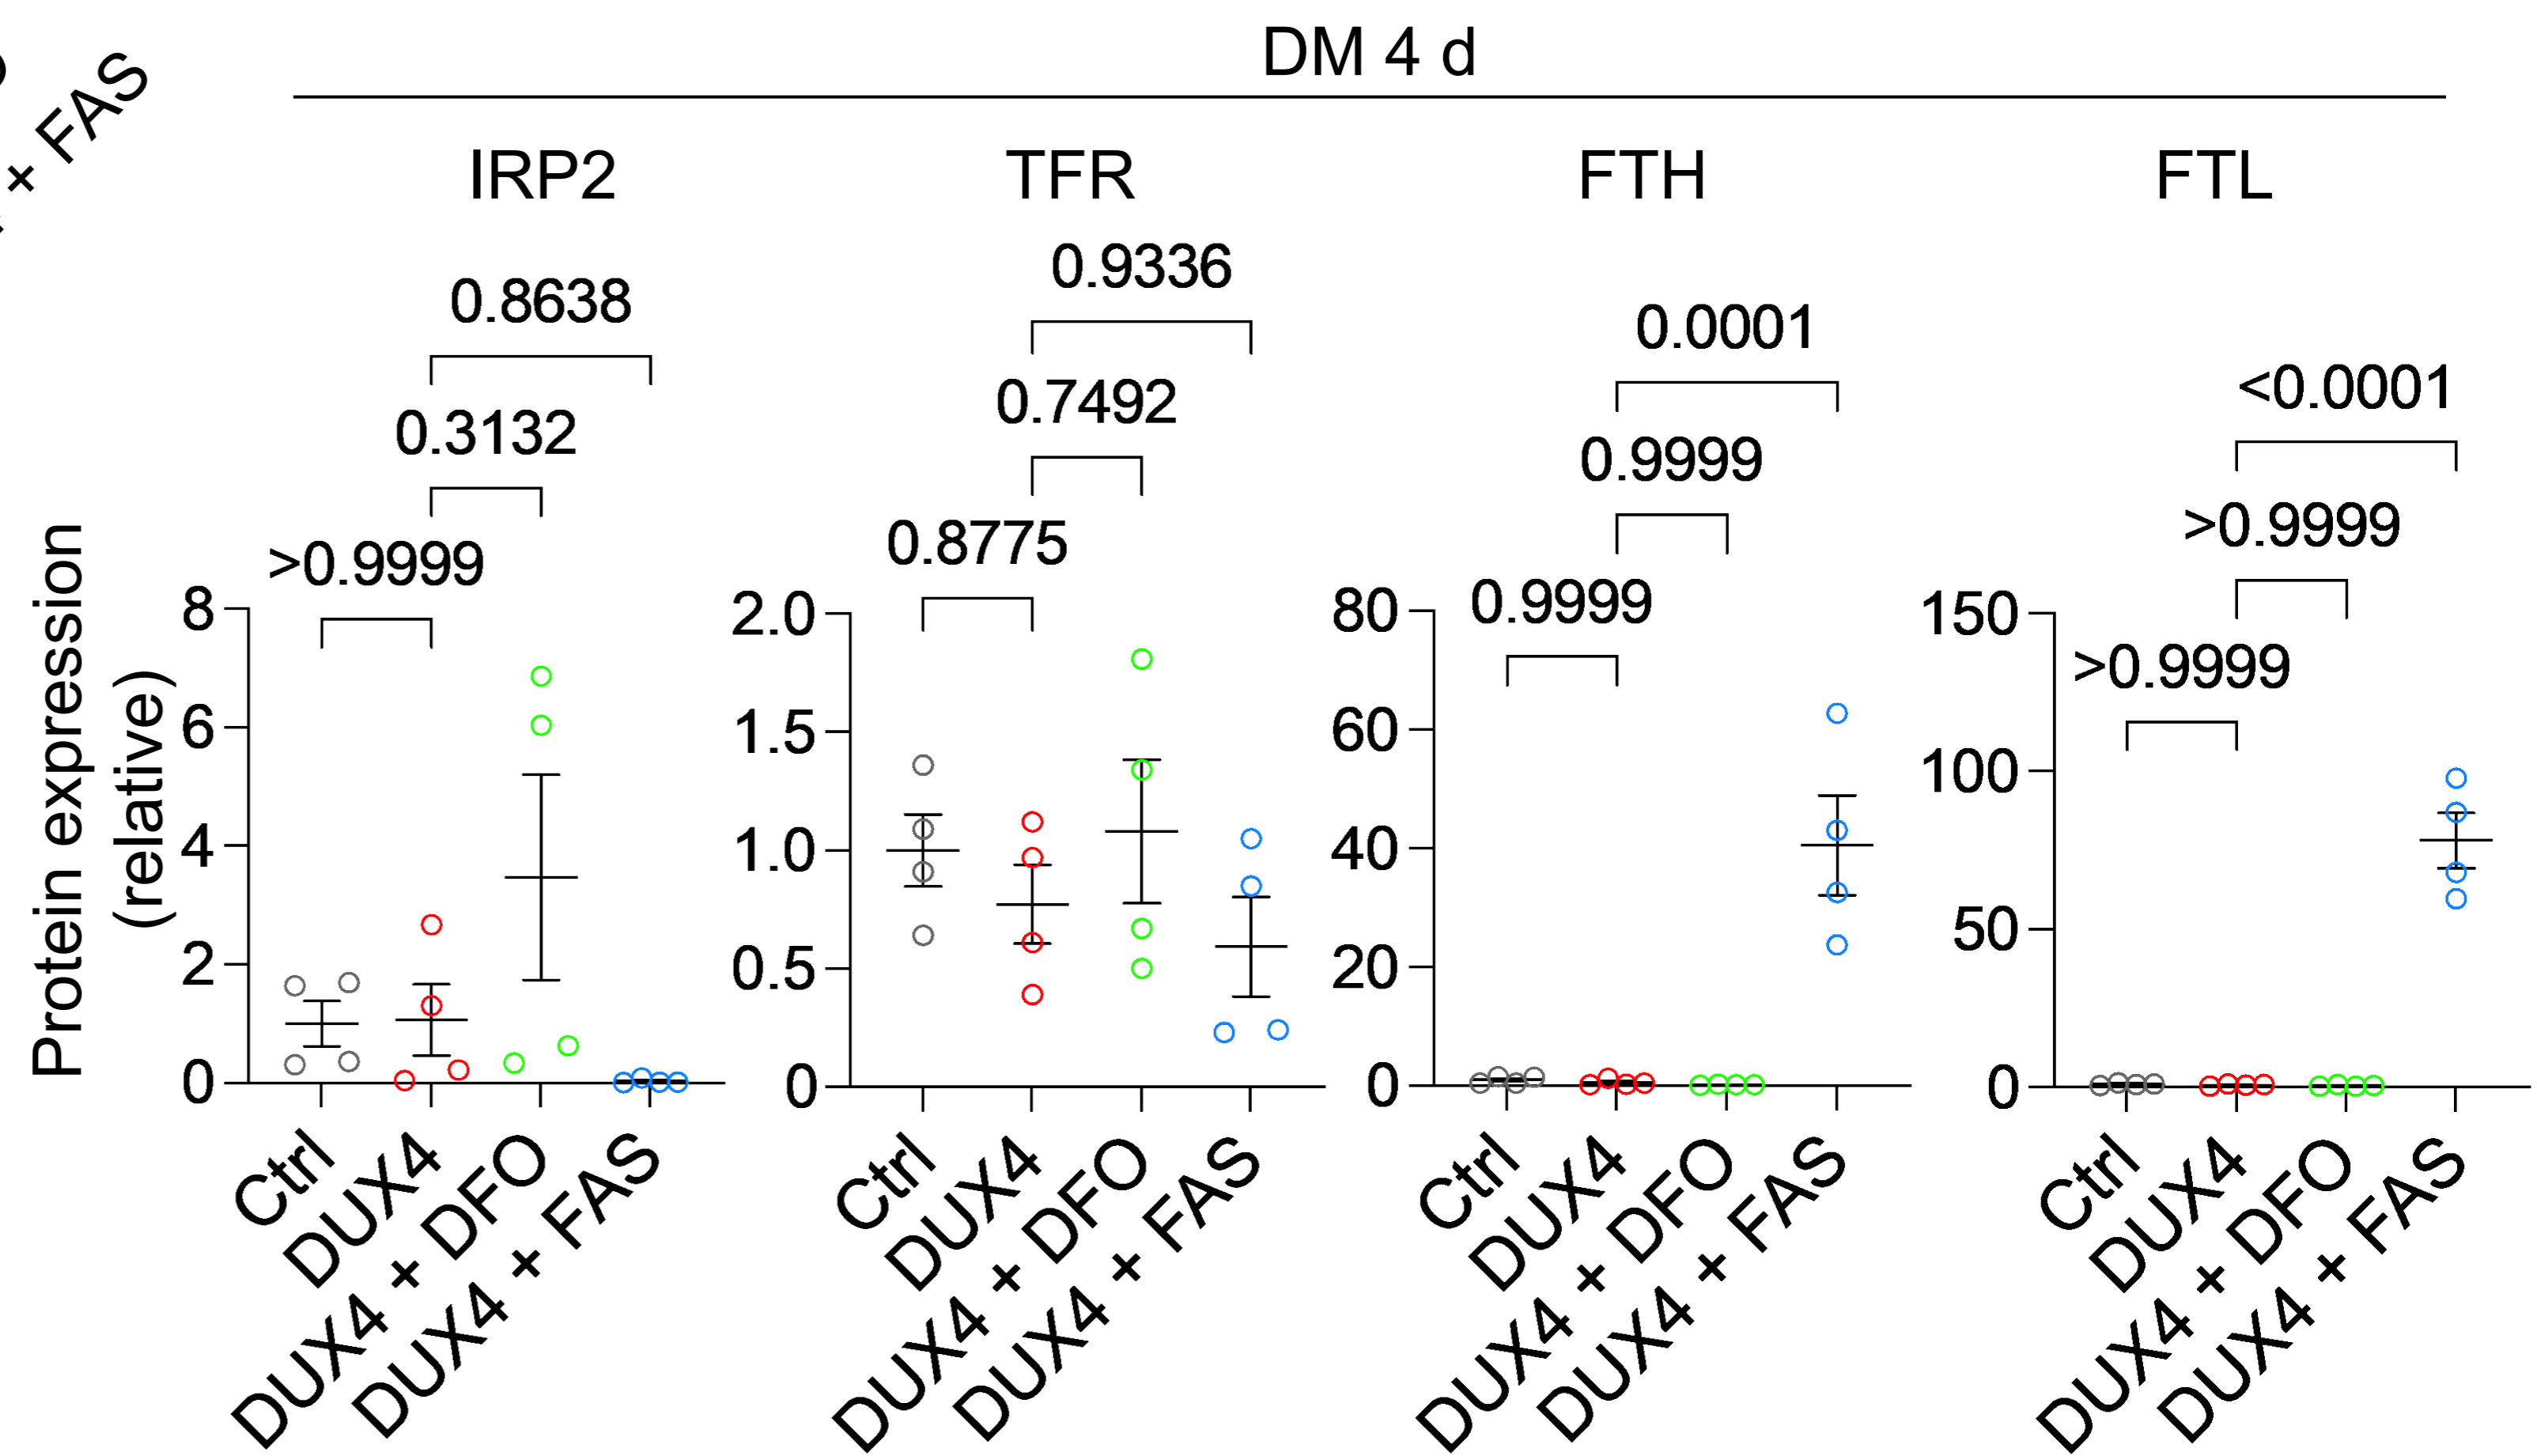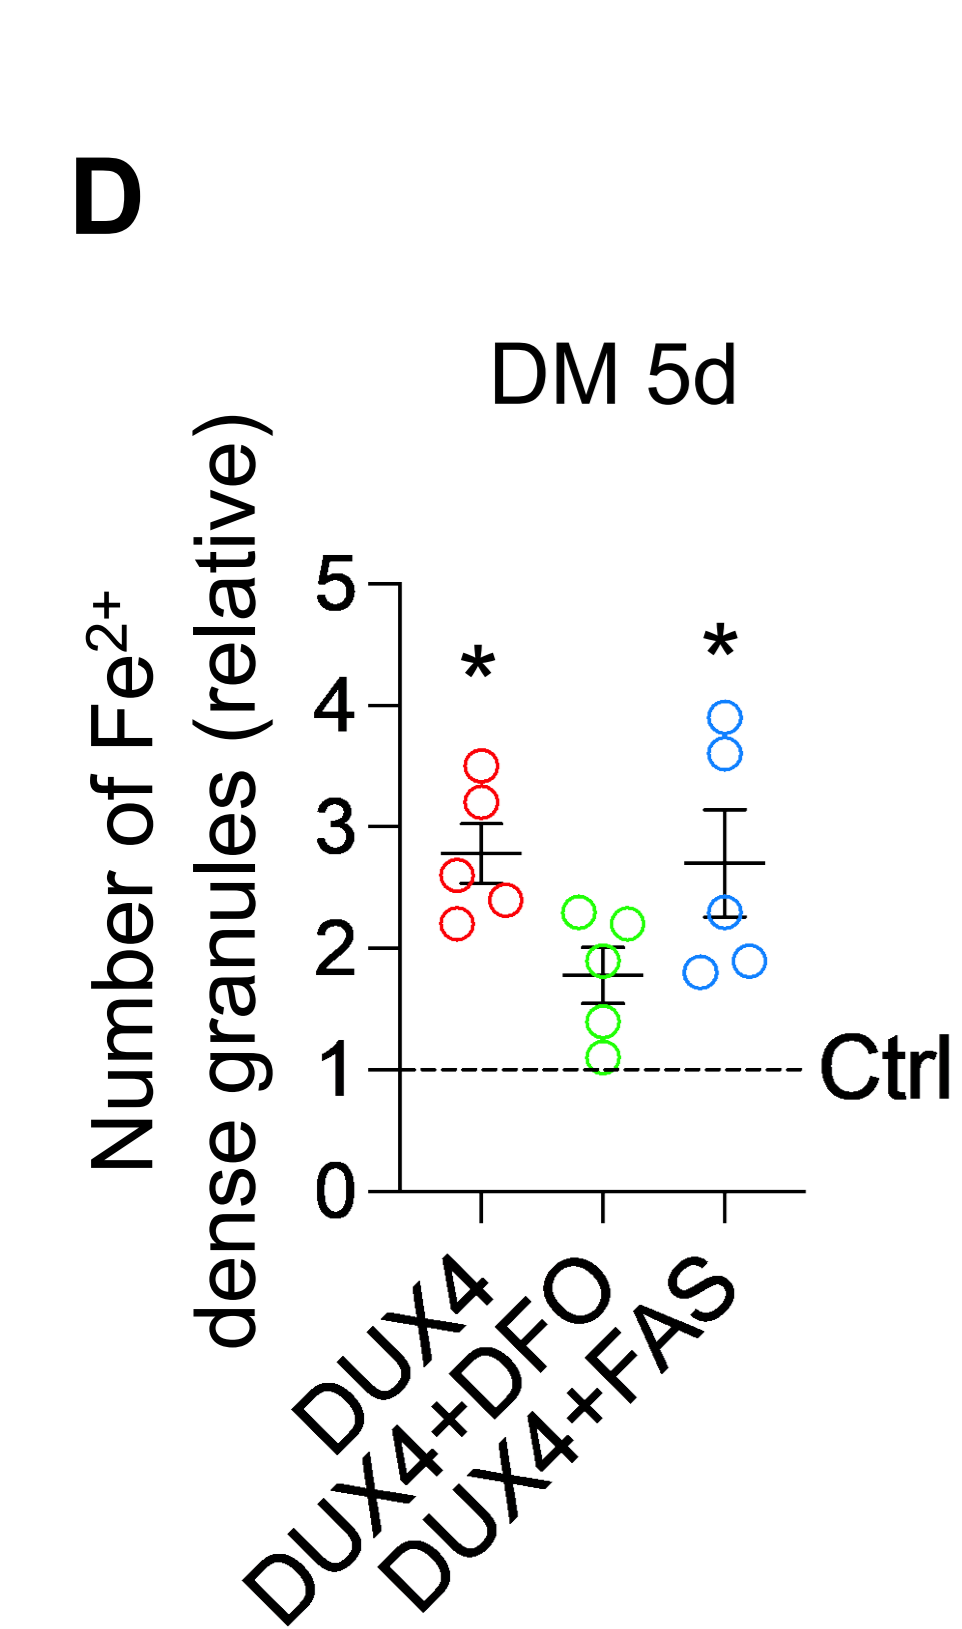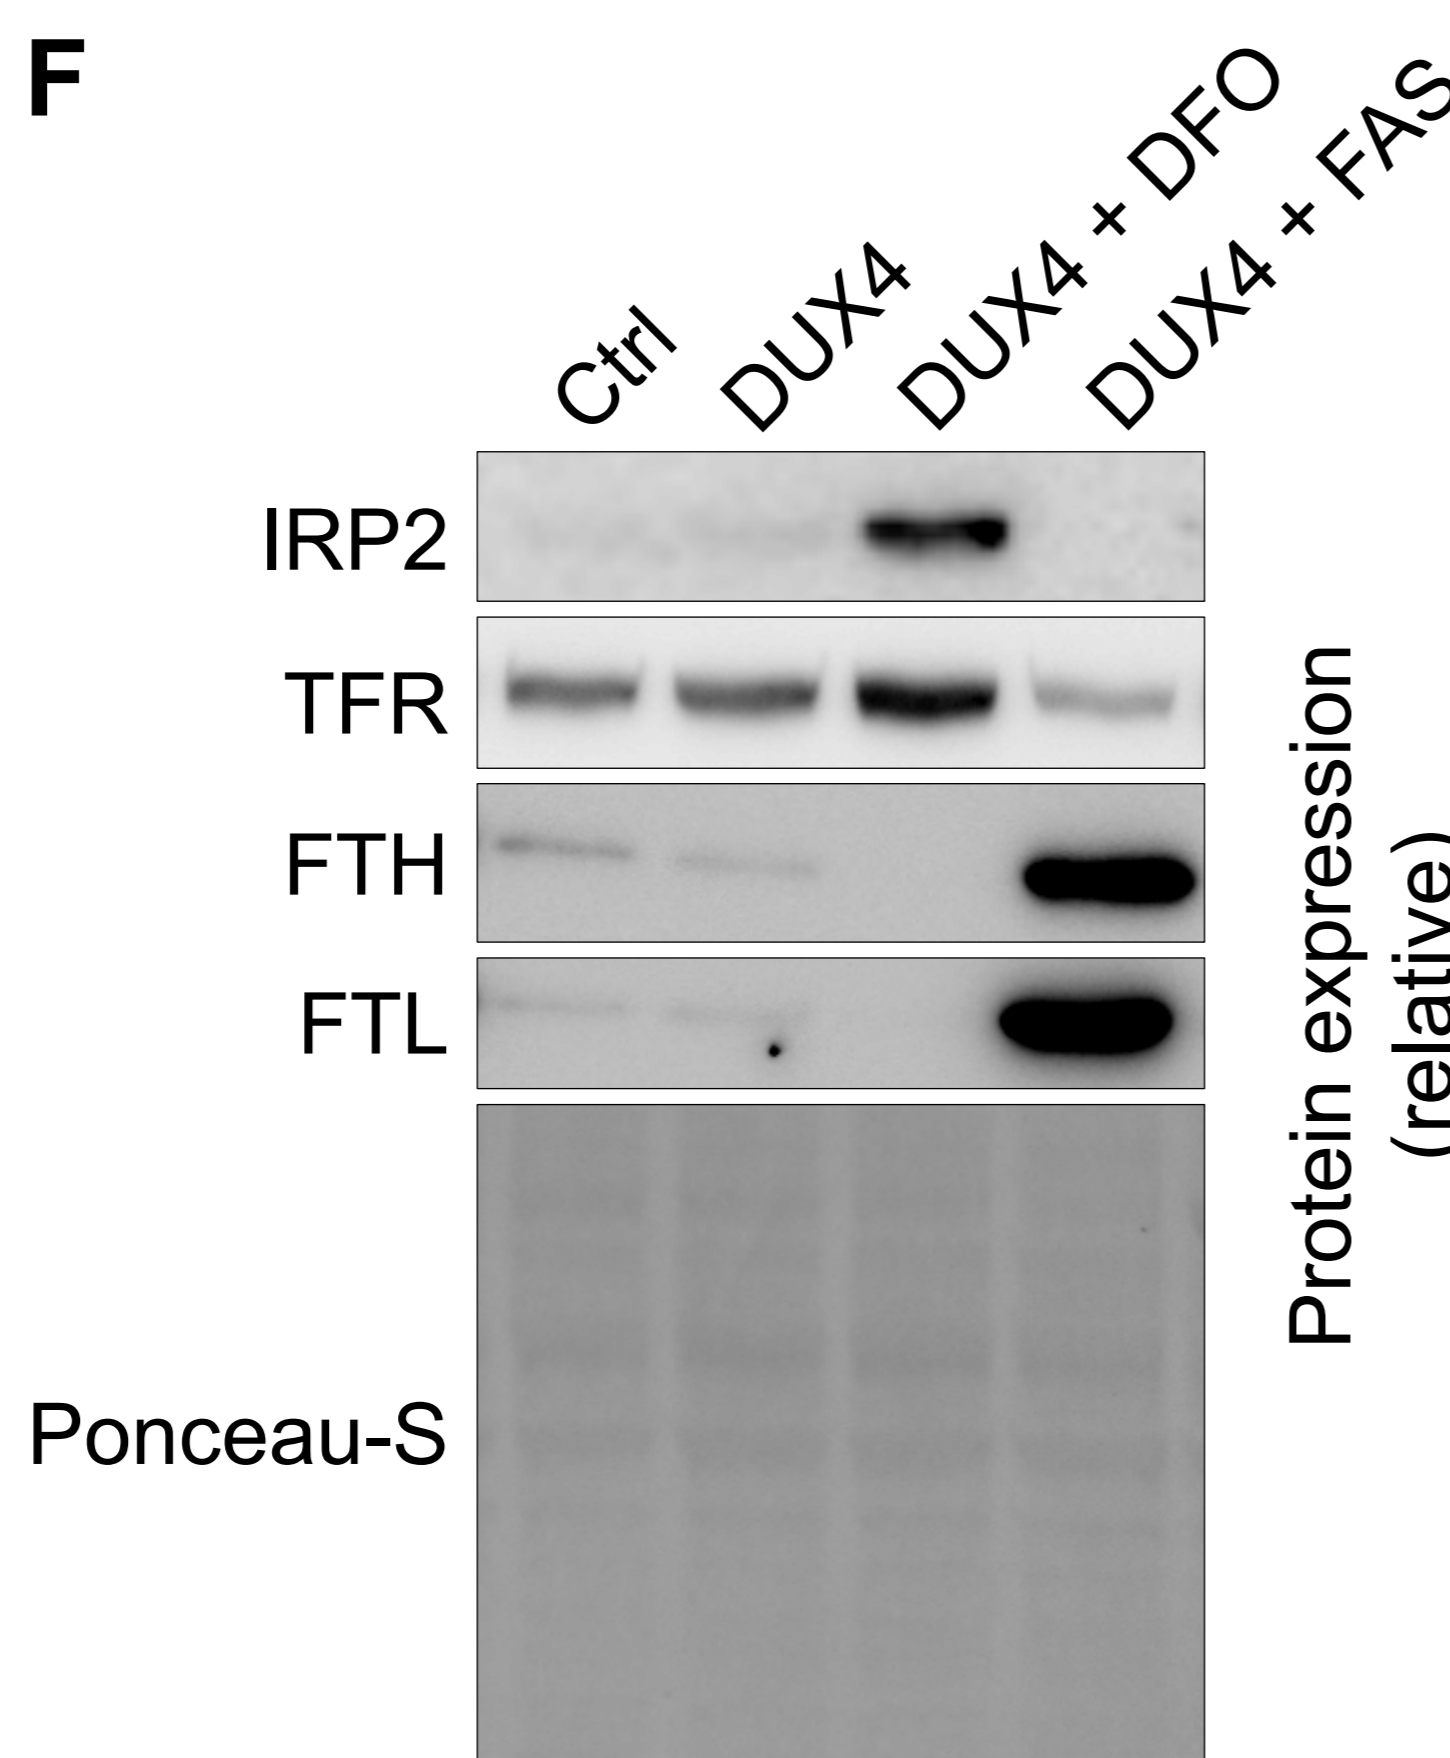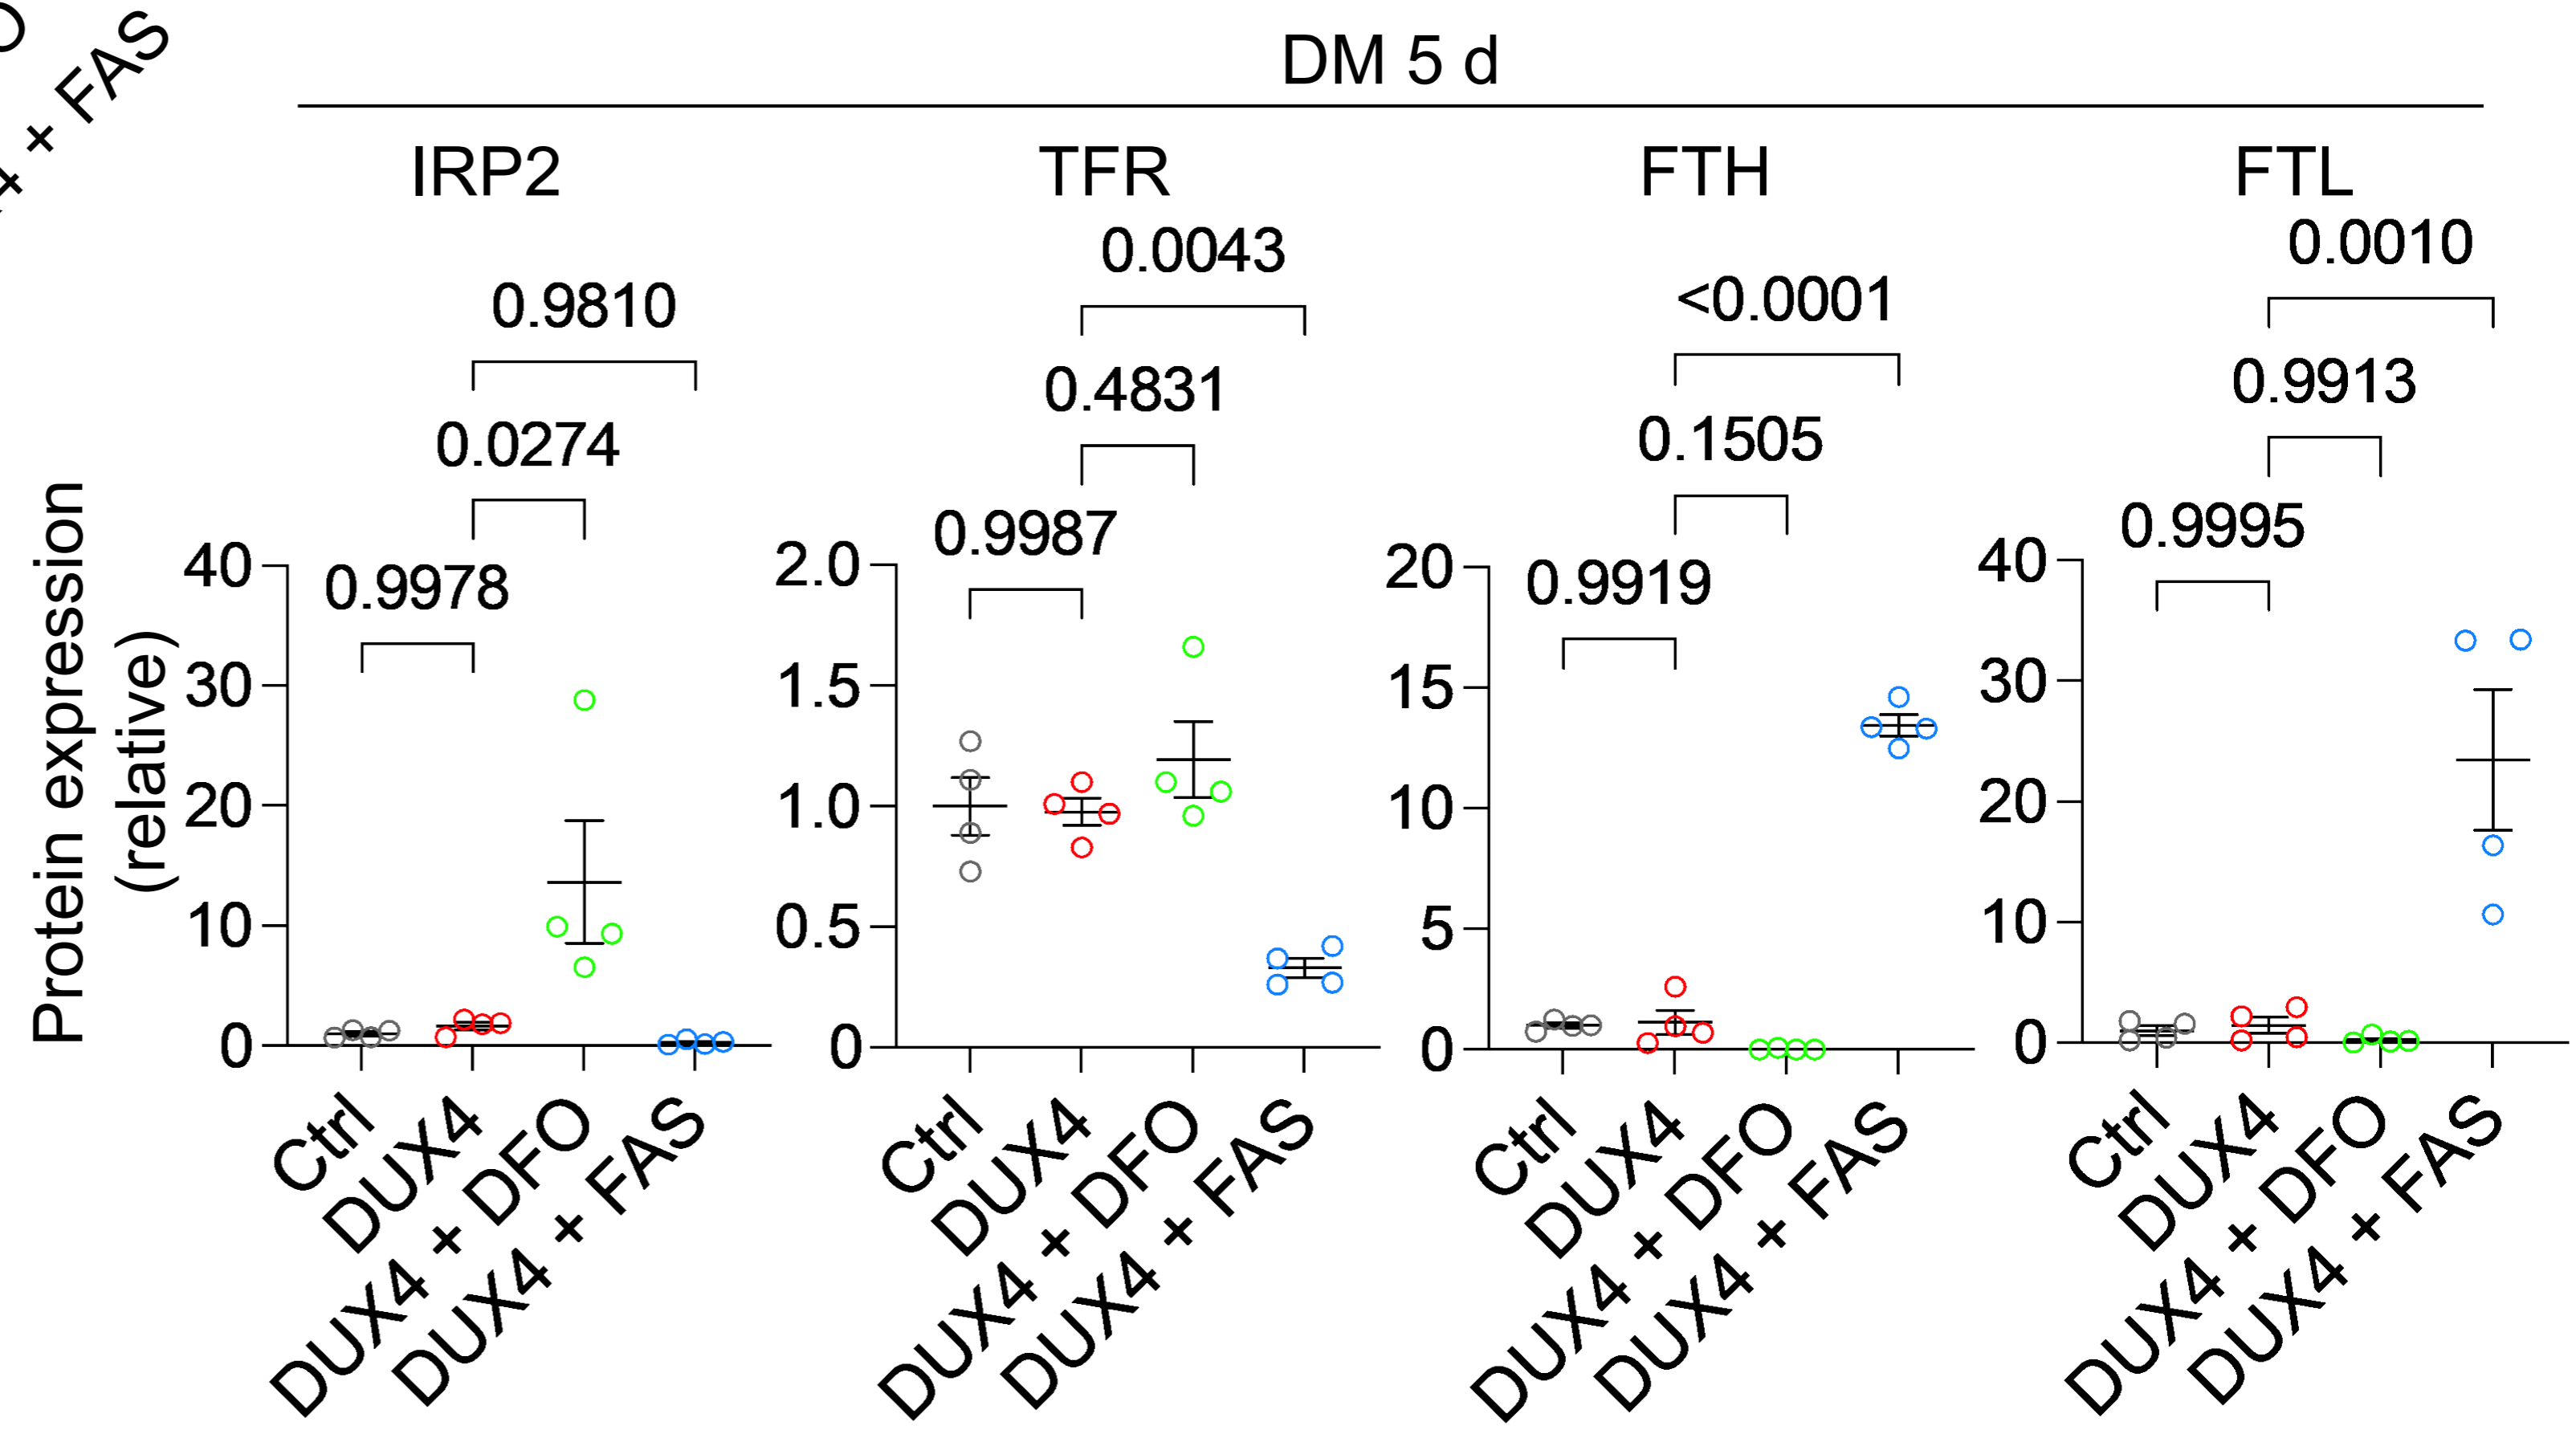

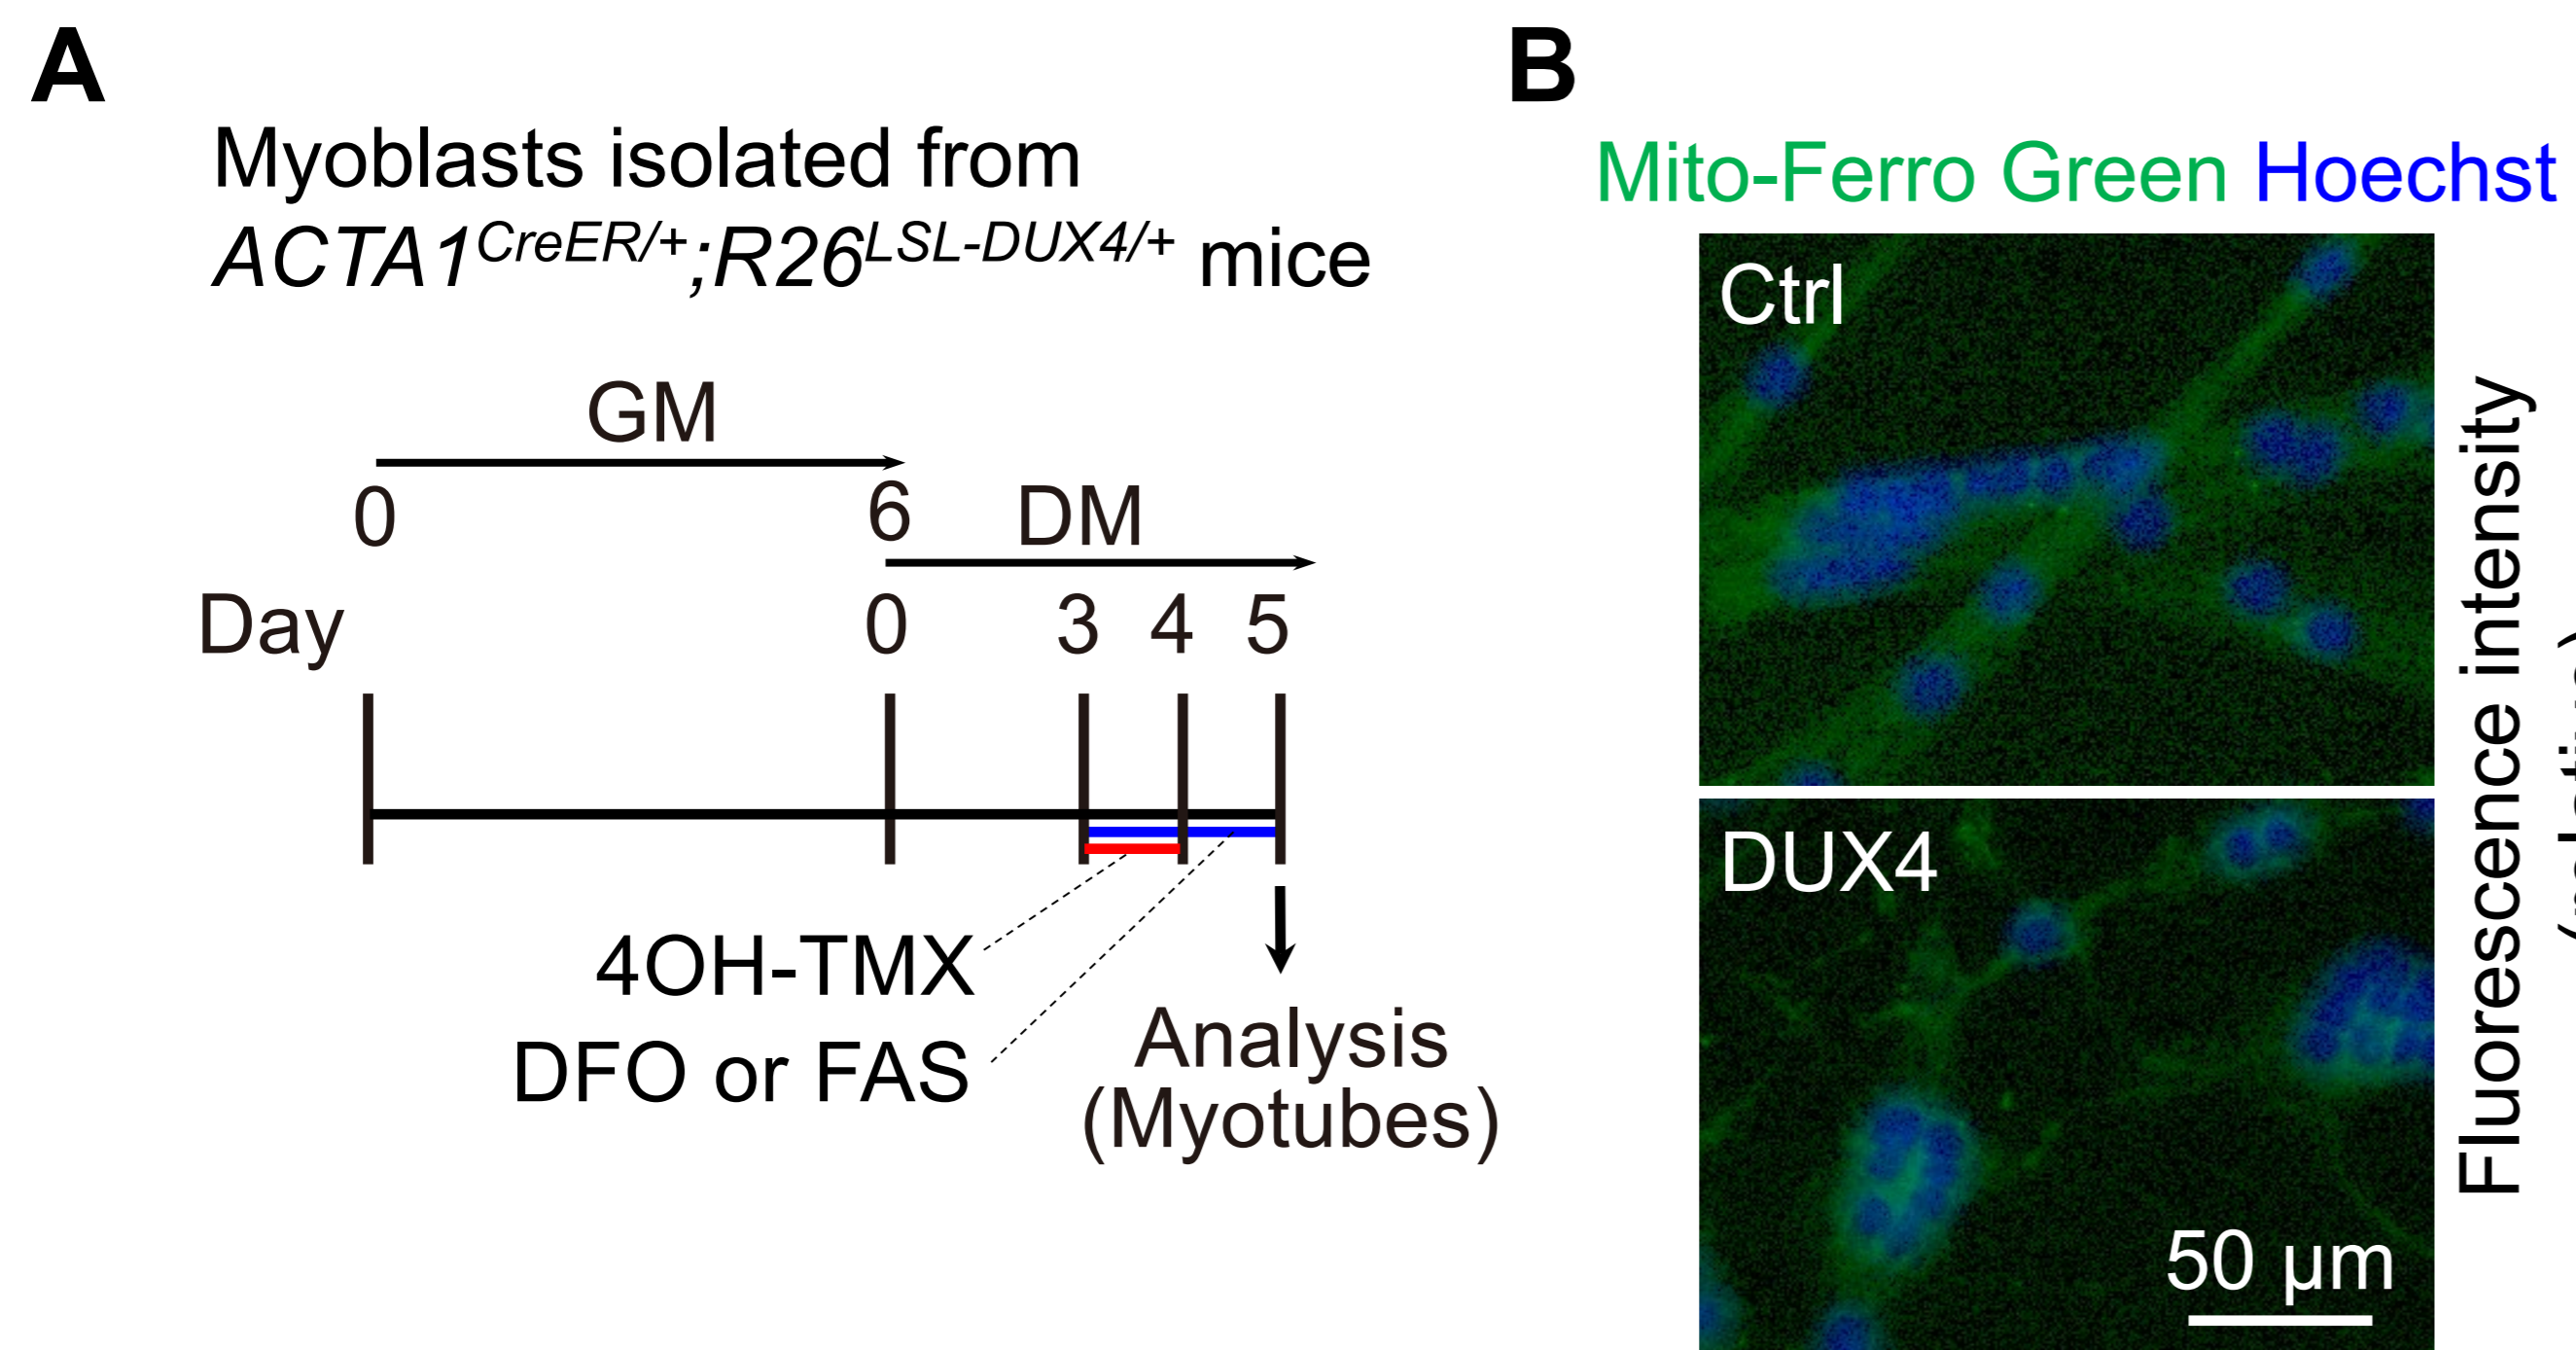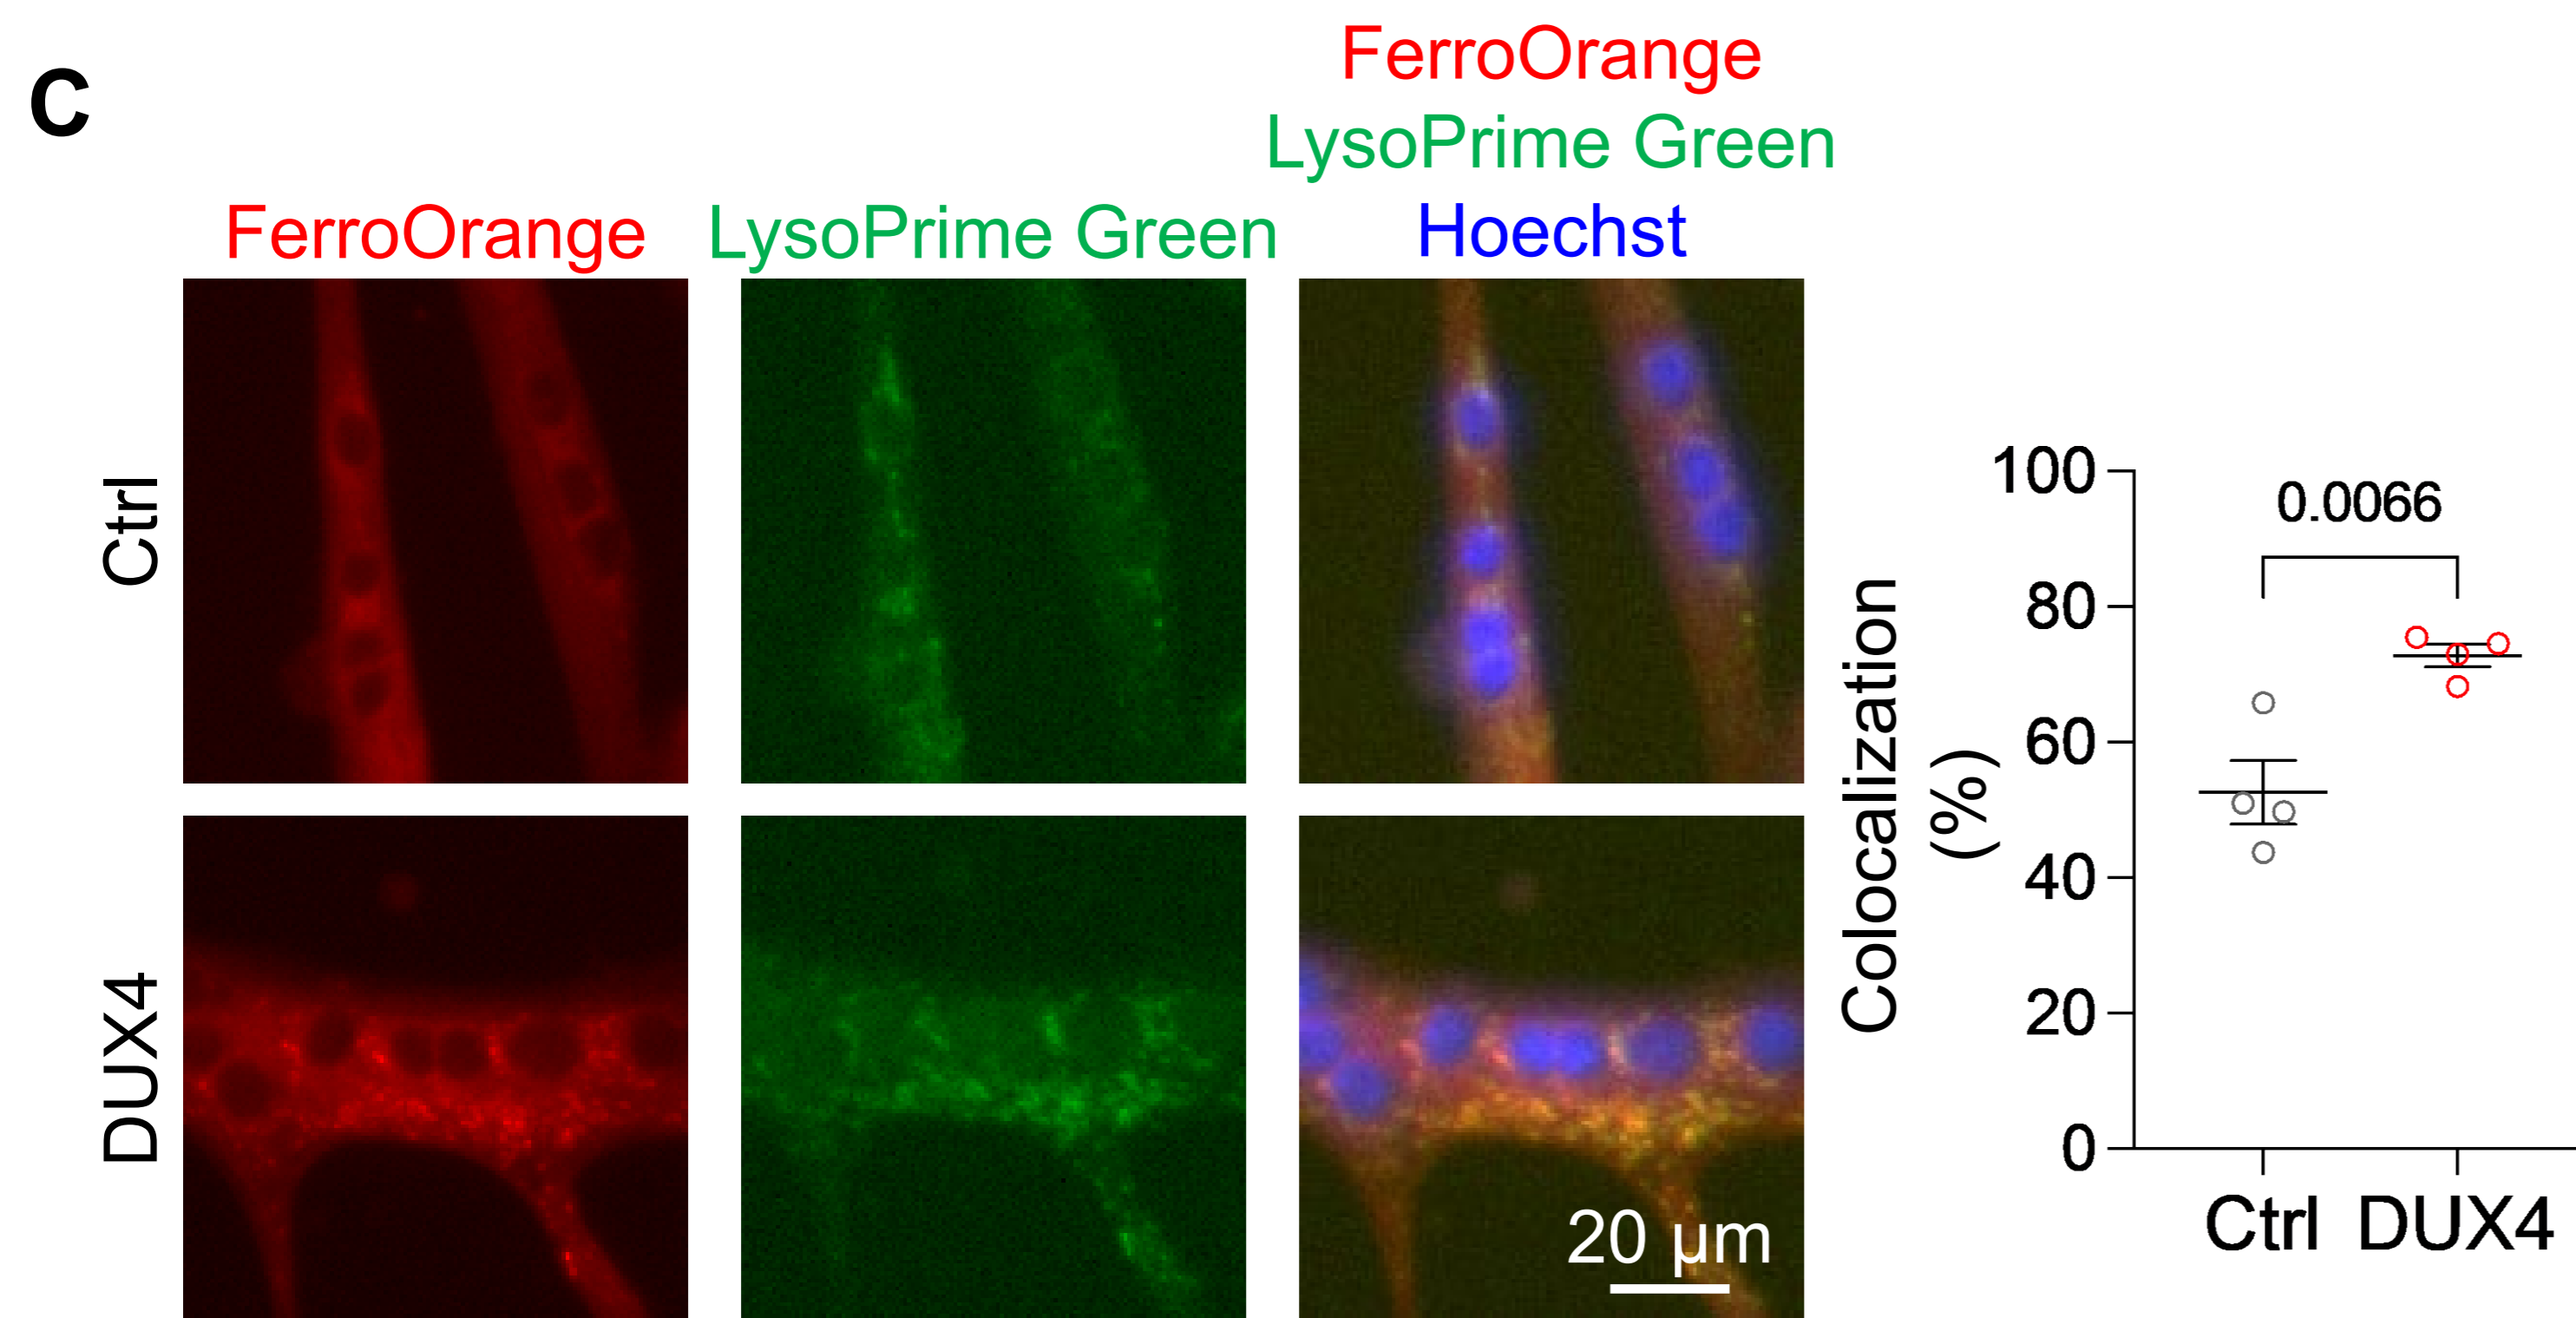

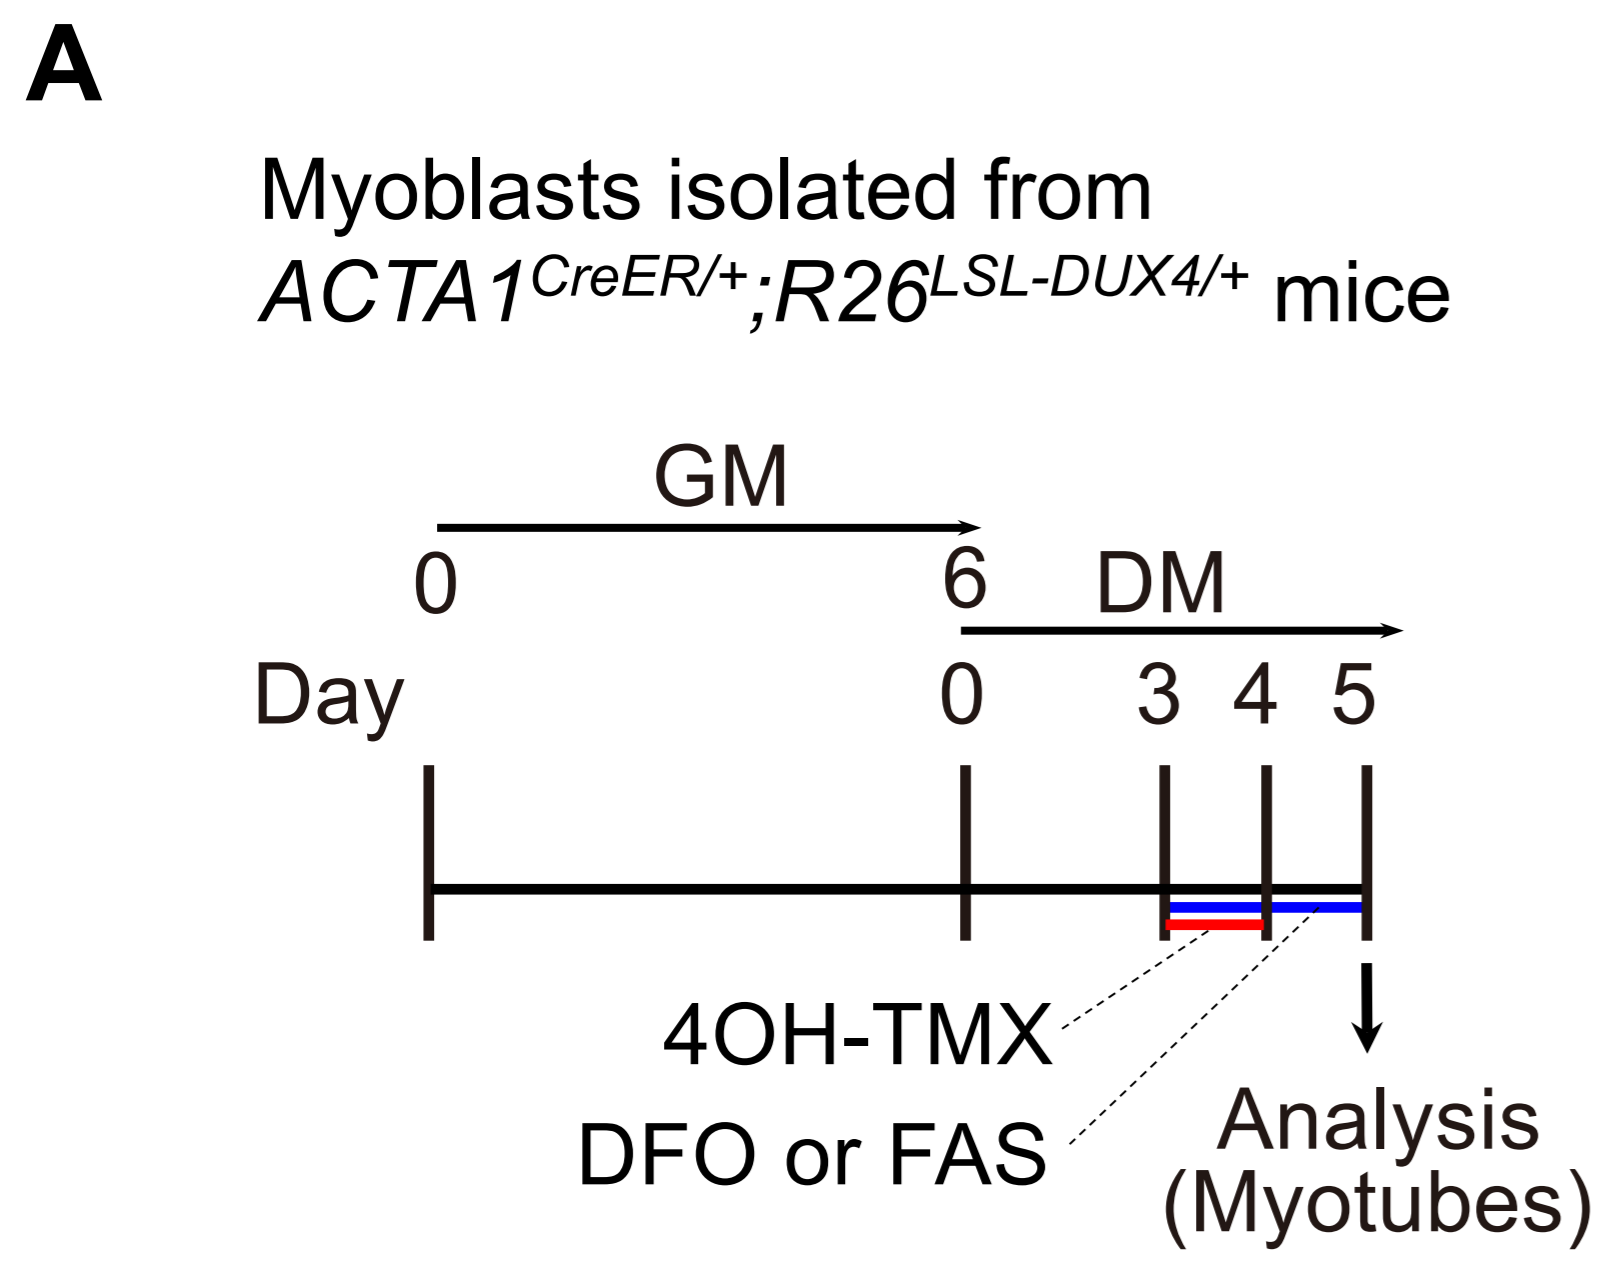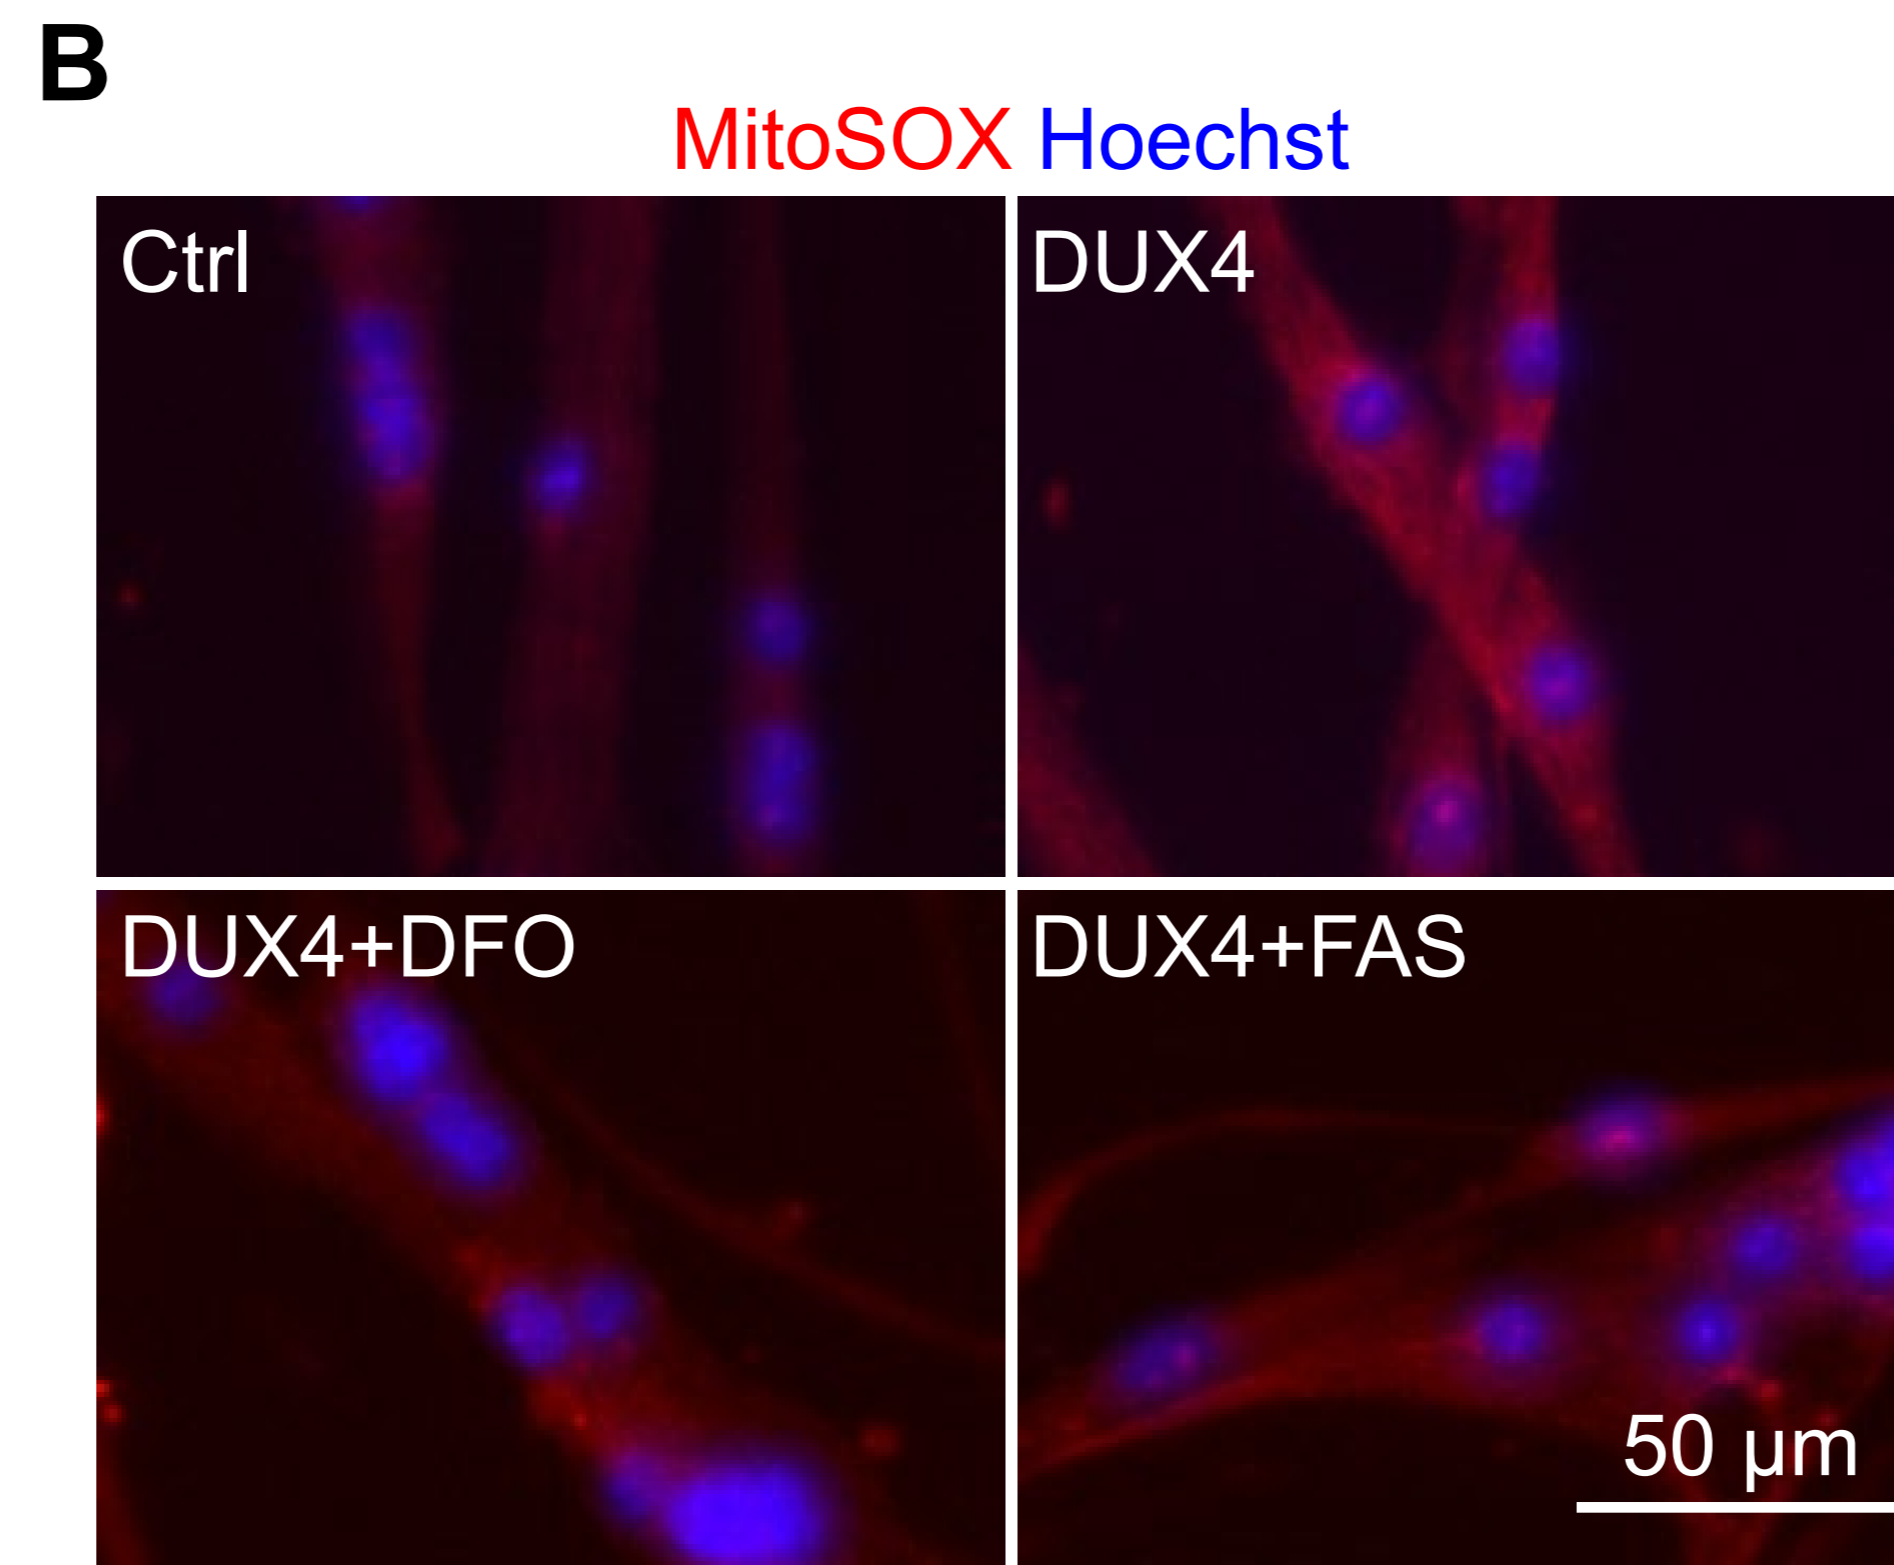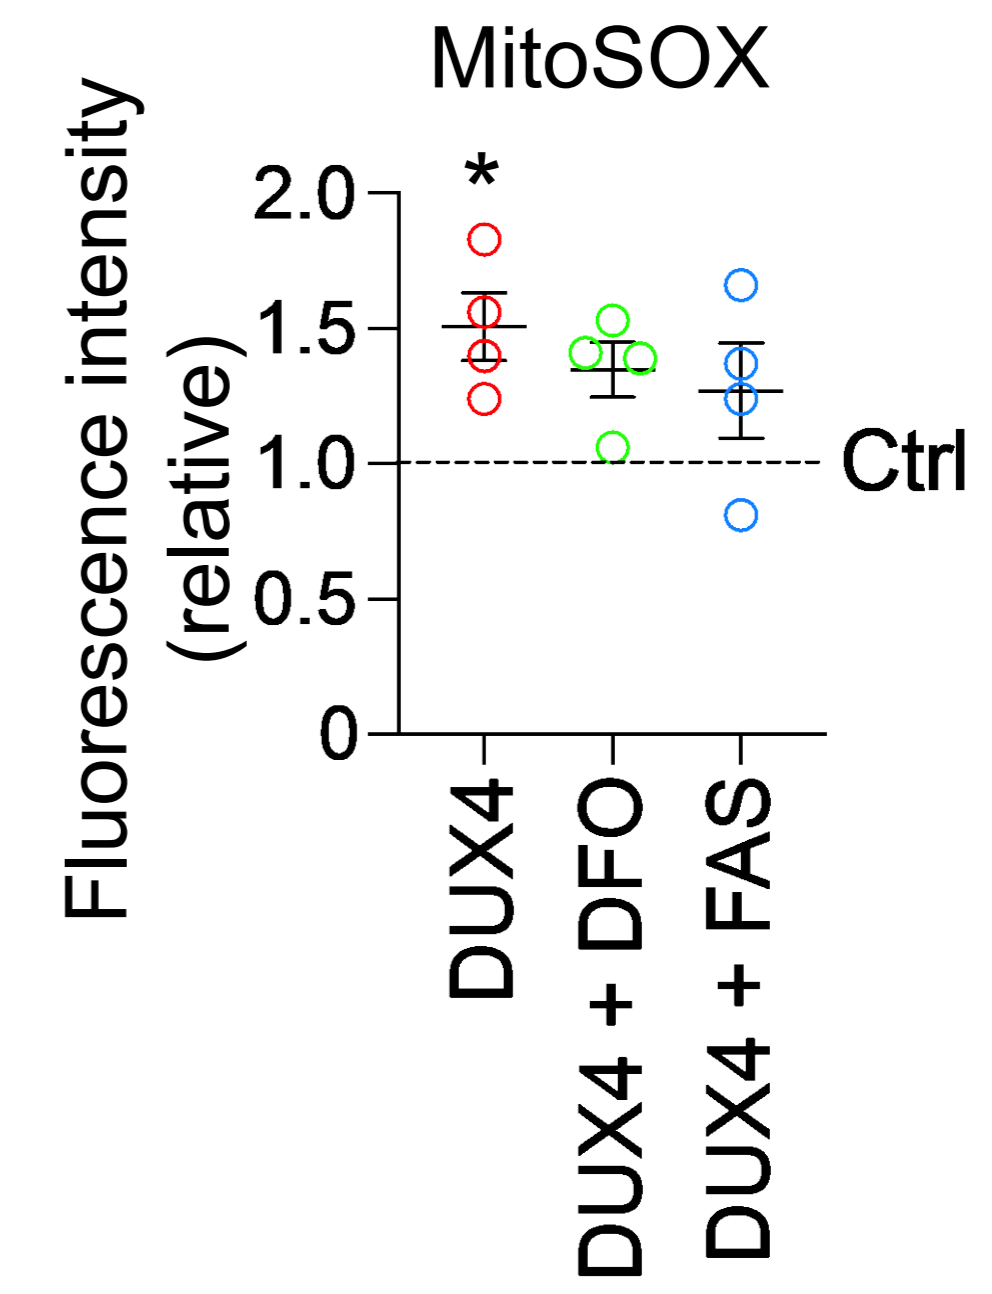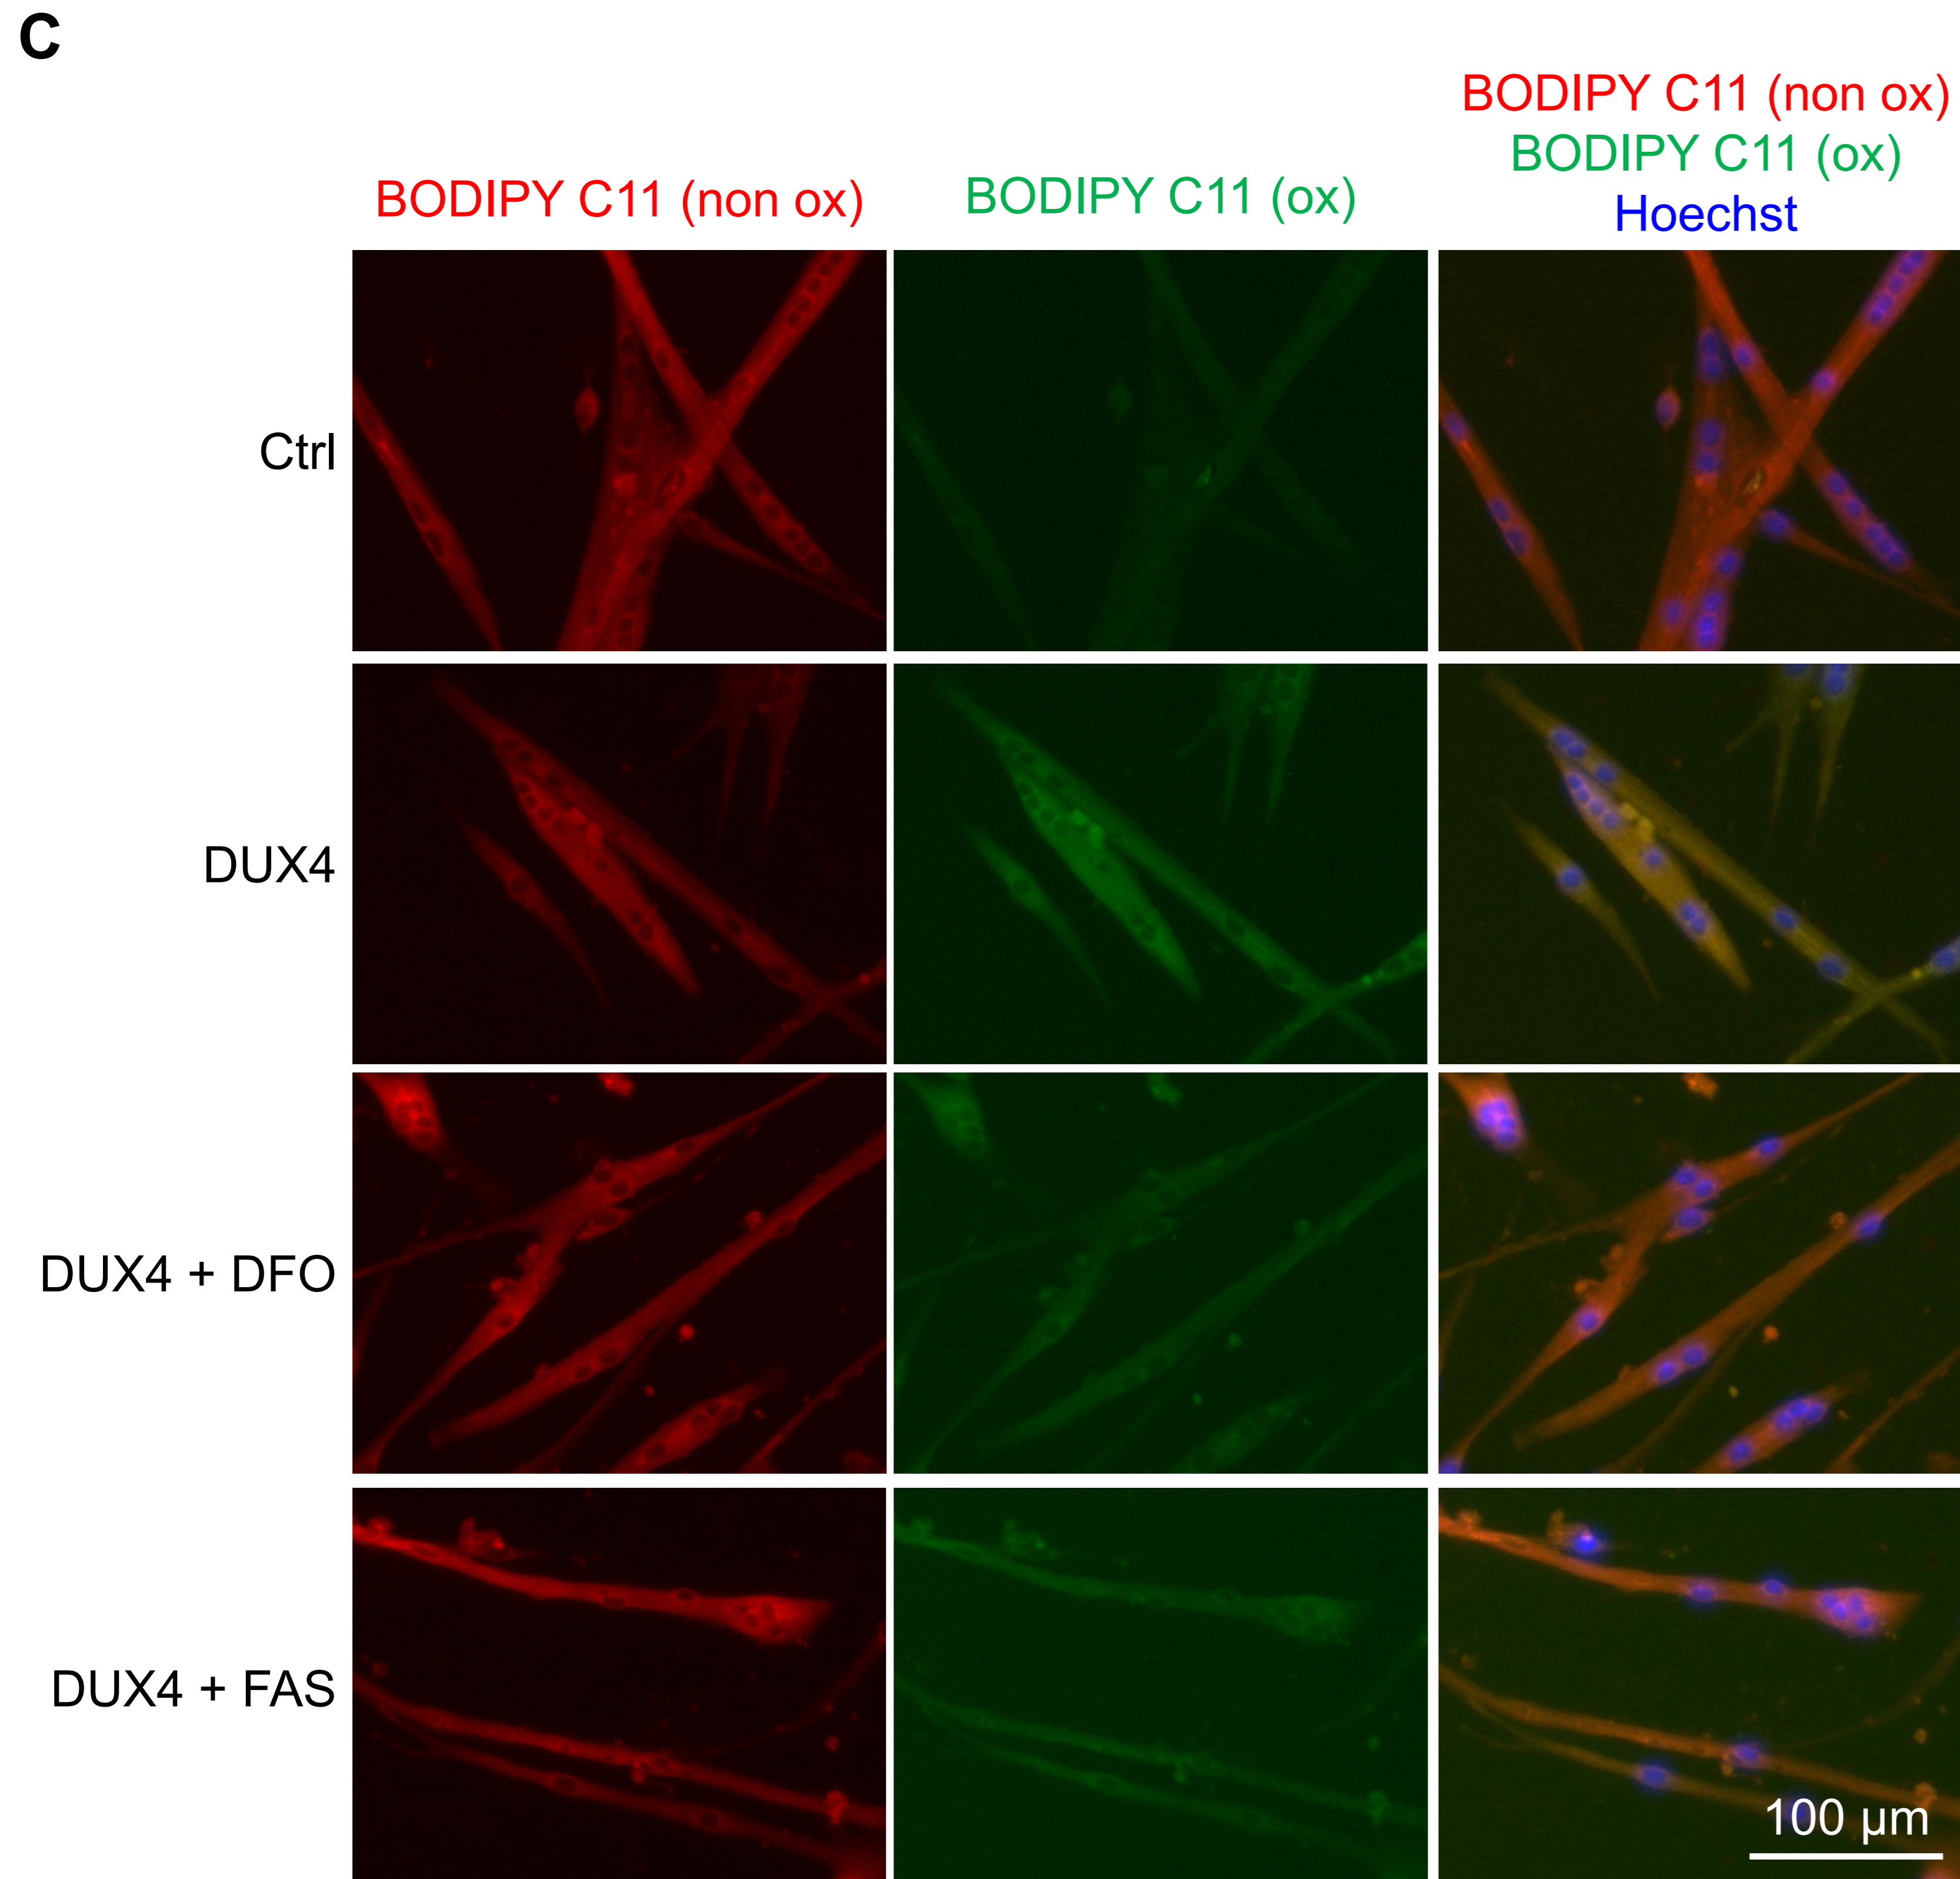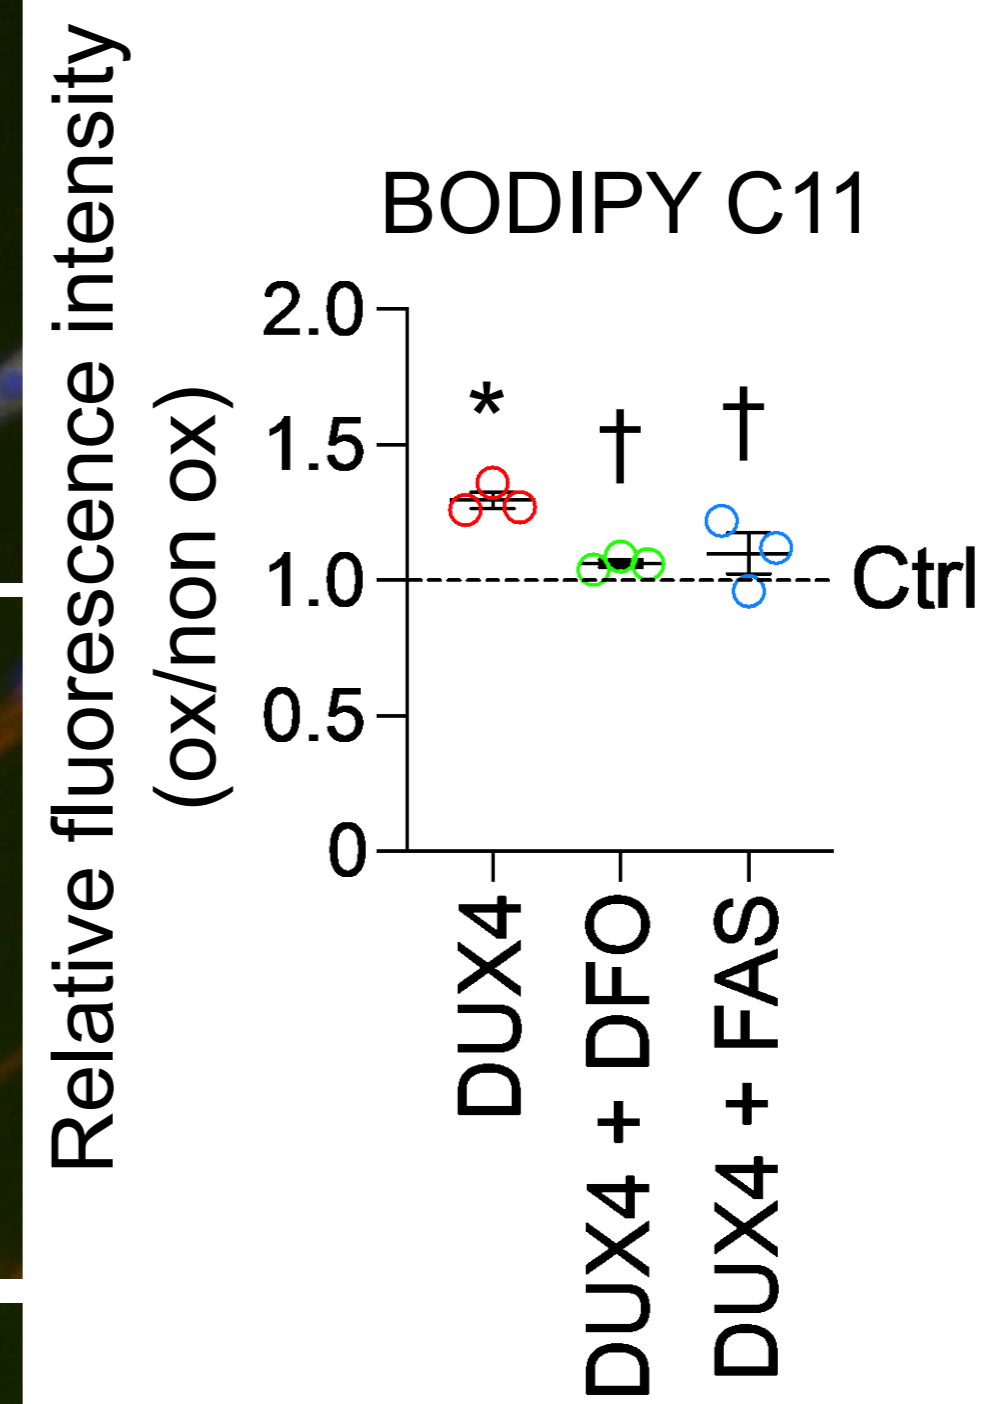

Supplement: sd1 [file 1]
