# Supplementary material for: Iron supplementation alleviates pathologies in a mouse model of facioscapulohumeral muscular dystrophy
Source: JCI journal article supplement (doi:10.1172/jci181881), 2025-07-01

Full unedited blot for Figure 8B

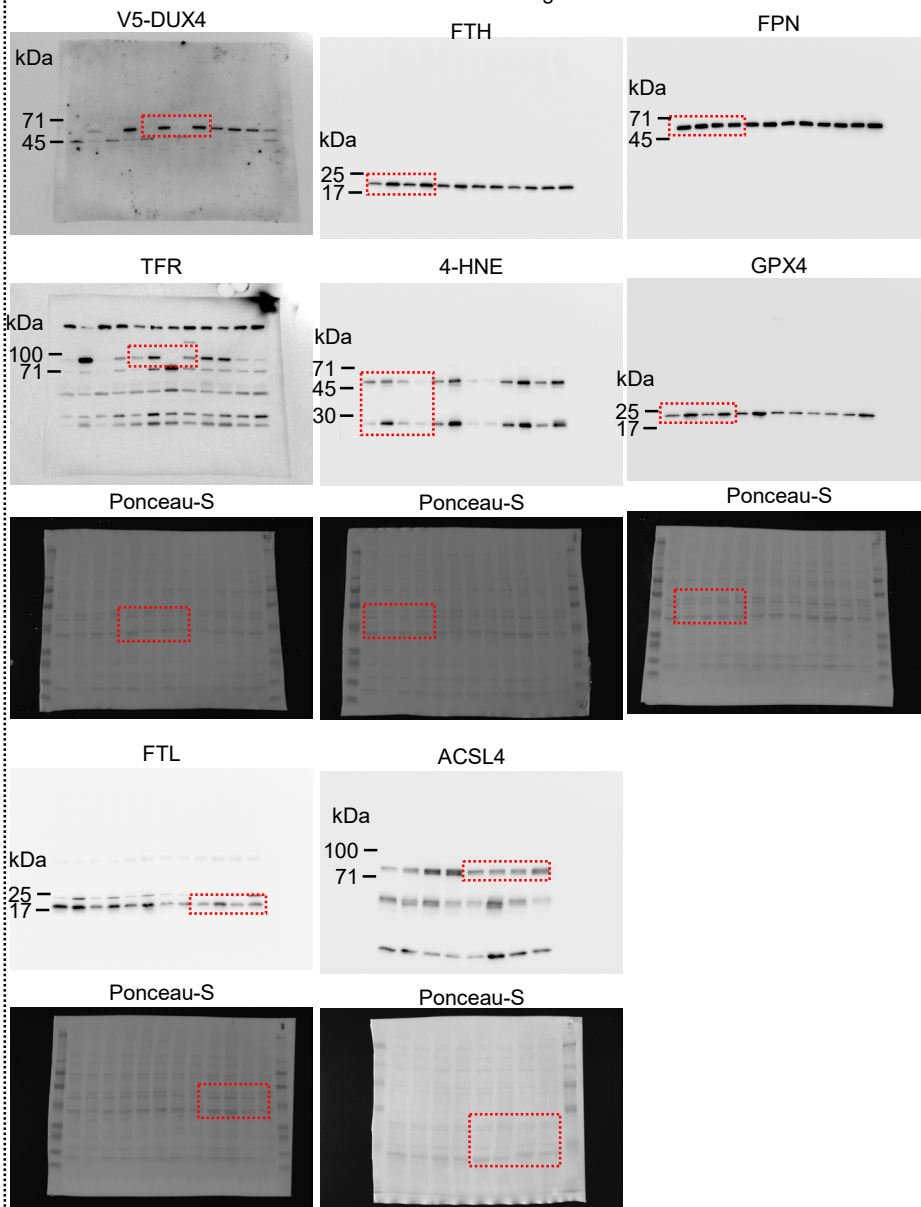

Full unedited blot for Supplementary Figure 7

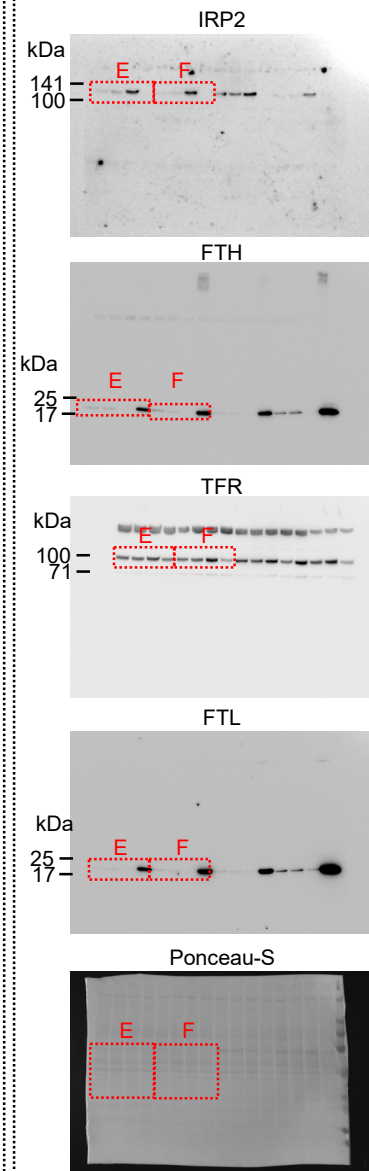

Supplement: sd2 [file 2]
